# Supplementary material
Source: HighWire-hosted journal article supplement (https://www.cfp.ca/highwire/filestream/36022/field_highwire_adjunct_files/1/Appendix_2.pdf)
Supplement: Appendix_2.pdf [file Appendix_2.pdf]

**PEER Systematic Review of Randomized Controlled Trials:  
Management of Chronic Low Back Pain in Primary Care  
Appendix 2**

Michael R. Kolber, Joey Ton, Betsy Thomas, Jessica Kirkwood, Samantha Moe, Nicolas Dugre, Karenn Chan, Adrienne J Lindblad, James McCormack, Scott Garrison, G. Michael Allan, Christina Korownyk, Rodger Craig, Logan Sept, Michael Wollin, Andrew Rouble, Danielle Perry

## Table of Contents

|                                                                                                                                                                                                                                                                        |           |
|------------------------------------------------------------------------------------------------------------------------------------------------------------------------------------------------------------------------------------------------------------------------|-----------|
| <b>Table 1: Low Back Pain Outcomes Hierarchy.....</b>                                                                                                                                                                                                                  | <b>7</b>  |
| <b>Table 2: Included Randomized Controlled Trials.....</b>                                                                                                                                                                                                             | <b>9</b>  |
| <b>Table 3: Overall proportion of patients with meaningful response and proportion at less than or equal to four weeks, four to twelve weeks and at greater than twelve weeks.....</b>                                                                                 | <b>17</b> |
| <b>Table 4: Overall proportion of patients with meaningful response at longest follow-up point after intervention .....</b>                                                                                                                                            | <b>18</b> |
| <b>Table 5: Proportion of patients with clinically meaningful response based on funding source (clearly publicly or industry funding) .....</b>                                                                                                                        | <b>19</b> |
| <b>Table 6: Proportion of patients with clinically meaningful response based on median risk of bias scores.....</b>                                                                                                                                                    | <b>20</b> |
| <b>Data Analysis .....</b>                                                                                                                                                                                                                                             | <b>21</b> |
| <b>Exercise .....</b>                                                                                                                                                                                                                                                  | <b>21</b> |
| Figure 1.1: Exercise versus no exercise; Outcome: Proportion of patients with a meaningful response to treatment. ....                                                                                                                                                 | 21        |
| Figure 1.2: Exercise versus no exercise; Outcome: Proportion of patients with a meaningful response to treatment at 4 weeks or less.....                                                                                                                               | 22        |
| Figure 1.3: Exercise versus no exercise; Outcome: Proportion of patients with a meaningful response to treatment at greater than 4 weeks and less than 12 weeks.....                                                                                                   | 22        |
| Figure 1.4: Exercise versus .....                                                                                                                                                                                                                                      | 22        |
| Figures 1.5: Exercise versus no exercise; Outcome: Proportion of patients with a meaningful response at longest follow up time. ....                                                                                                                                   | 23        |
| Figures 1.6: Exercise versus no exercise; Subgroup analysis: Proportion of patients with a meaningful response to treatment, analyzed by study funding source (public or industry funding).....                                                                        | 23        |
| Figures 1.7: Exercise versus no exercise; Subgroup analysis: Proportion of patients with a meaningful response to treatment, analyzed by median risk of bias (less than the median risk of bias score or greater than or equal to the median risk of bias score) ..... | 24        |
| <b>Acupuncture .....</b>                                                                                                                                                                                                                                               | <b>25</b> |
| Figure 2.1: Acupuncture versus control; Outcome: Proportion of patients with a meaningful response to treatment. ....                                                                                                                                                  | 25        |
| Figure 2.2: Acupuncture versus control; Outcome: Proportion of patients with a meaningful response to treatment at 4 weeks or less.....                                                                                                                                | 26        |
| Figure 2.3: Acupuncture versus control; Outcome: Proportion of patients with a meaningful response to treatment at greater than 4 weeks and less than 12 weeks.....                                                                                                    | 26        |
| Figure 2.4: Acupuncture versus control; Outcome: Proportion of patients with a meaningful response to treatment at 12 weeks or greater.....                                                                                                                            | 26        |
| Figure 2.5: Acupuncture versus control; Outcome: Proportion of patients with a meaningful response at longest follow up time .....                                                                                                                                     | 26        |
| Figure 2.6: Acupuncture versus control; Subgroup analysis: Proportion of patients with a meaningful response to treatment, analyzed by study funding source (public or industry funding).....                                                                          | 27        |
| Figure 2.7: Acupuncture versus control; Subgroup analysis: Proportion of patients with a meaningful response to treatment, analyzed by median risk of bias (less than the median risk of bias score or greater than or equal to the median risk of bias score) .....   | 27        |
| <b>Spinal Manipulation.....</b>                                                                                                                                                                                                                                        | <b>28</b> |

|                                                                                                                                                                                                                                                                                                 |           |
|-------------------------------------------------------------------------------------------------------------------------------------------------------------------------------------------------------------------------------------------------------------------------------------------------|-----------|
| Figure 3.1: Spinal Manipulation versus control; Outcome: Proportion of patients with a meaningful response to treatment.....                                                                                                                                                                    | 28        |
| Figure 3.2: Spinal Manipulation versus control; Outcome: Proportion of patients with a meaningful response to treatment at 4 weeks or less. (Post hoc analysis).....                                                                                                                            | 28        |
| Figure 3.3: Spinal Manipulation versus control; Outcome: Proportion of patients with a meaningful response to treatment at greater than 4 weeks and less than 12 weeks. ....                                                                                                                    | 28        |
| (Post hoc analysis).....                                                                                                                                                                                                                                                                        | 28        |
| Figure 3.4: Spinal Manipulation versus control; Outcome: Proportion of patients with a meaningful response to treatment at 12 weeks or greater. (Post hoc analysis).....                                                                                                                        | 28        |
| Figure 3.5: Spinal Manipulation versus control; Outcome: Proportion of patients with a meaningful response at longest follow up time. ....                                                                                                                                                      | 29        |
| Figure 3.6: Spinal Manipulation versus control; Subgroup analysis: Proportion of patients with a meaningful response to treatment, analyzed by study funding source (public or industry funding) (Post hoc analysis) ....                                                                       | 29        |
| Figure 3.7: Spinal Manipulation versus control; Subgroup analysis: Proportion of patients with a meaningful response to treatment, analyzed by median risk of bias (less than the median risk of bias score or greater than or equal to the median risk of bias score) (post hoc analysis)..... | 30        |
| <b>Oral NSAIDs .....</b>                                                                                                                                                                                                                                                                        | <b>31</b> |
| Figure 4.1: Oral NSAIDs versus placebo; Outcome: Proportion of patients with a meaningful response to treatment .....                                                                                                                                                                           | 31        |
| Figure 4.2: Oral NSAIDs versus placebo; Outcome: Proportion of patients with a meaningful response to treatment at 4 weeks or less. (Post hoc analysis).....                                                                                                                                    | 31        |
| Figure 4.3: Oral NSAIDs versus placebo; Outcome: Proportion of patients with a meaningful response to treatment at greater than 4 weeks and less than 12 weeks. (Post hoc analysis) .....                                                                                                       | 31        |
| Figure 4.4: Oral NSAIDs versus placebo; Outcome: Proportion of patients with a meaningful response to treatment at 12 weeks or greater. (Post hoc analysis) .....                                                                                                                               | 31        |
| Figure 4.5: Oral NSAIDs versus placebo; Subgroup analysis: Proportion of patients with a meaningful response to treatment, analyzed by study funding source (public or industry funding) (Post hoc analysis) ....                                                                               | 32        |
| Figure 4.6: Oral NSAIDs versus placebo; Subgroup analysis: Proportion of patients with a meaningful response to treatment, analyzed by median risk of bias (less than the median risk of bias score or greater than or equal to the median risk of bias score) (post hoc analysis).....         | 32        |
| <b>Rubefacients.....</b>                                                                                                                                                                                                                                                                        | <b>33</b> |
| Figure 5.1: Rubefacients versus placebo; Outcome: Proportion of patients with a meaningful response to treatment. ....                                                                                                                                                                          | 33        |
| Figure 5.2: Rubefacients versus placebo; Outcome: Proportion of patients with a meaningful response to treatment at 4 weeks or less. (Post hoc analysis) .....                                                                                                                                  | 33        |
| Figure 5.3: Rubefacients versus placebo; Subgroup analysis: Proportion of patients with a meaningful response to treatment, analyzed by study funding source (public or industry funding) (Post hoc analysis) ....                                                                              | 33        |
| Figure 5.4: Rubefacients versus placebo; Subgroup analysis: Proportion of patients with a meaningful response to treatment, analyzed by median risk of bias (less than the median risk of bias score or greater than or equal to the median risk of bias score) (post hoc analysis).....        | 34        |
| <b>Opioids .....</b>                                                                                                                                                                                                                                                                            | <b>35</b> |
| Figure 6.1: Opioids versus placebo; Outcome: Proportion of patients with a meaningful response to treatment .....                                                                                                                                                                               | 35        |
| Figure 6.2: Opioids versus placebo; Outcome: Proportion of patients with a meaningful response to treatment at 4 weeks or less. (Post hoc analysis).....                                                                                                                                        | 35        |
| Figure 6.3: Opioids versus placebo; Outcome: Outcome: Proportion of patients with a meaningful response to treatment at 12 weeks or greater. (Post hoc analysis).....                                                                                                                           | 35        |
| Figure 6.4: Opioids versus placebo; Subgroup analysis: Proportion of patients with a meaningful response to treatment, analyzed by study funding source (public or industry funding) (Post hoc analysis) .....                                                                                  | 36        |

|                                                                                                                                                                                                                                                                                                |           |
|------------------------------------------------------------------------------------------------------------------------------------------------------------------------------------------------------------------------------------------------------------------------------------------------|-----------|
| Figure 6.5: Opioids versus placebo; Subgroup analysis: Proportion of patients with a meaningful response to treatment, analyzed by median risk of bias (less than the median risk of bias score or greater than or equal to the median risk of bias score) (post hoc analysis).....            | 36        |
| <b>SNRIs .....</b>                                                                                                                                                                                                                                                                             | <b>37</b> |
| Figure 7.1: SNRIs (duloxetine) versus placebo; Outcome: Proportion of patients with a meaningful response to treatment.....                                                                                                                                                                    | 37        |
| Figure 7.2: SNRIs (duloxetine) versus placebo; Outcome: Proportion of patients with a meaningful response to treatment at 12 weeks or greater. (Post hoc analysis) .....                                                                                                                       | 37        |
| Figure 7.3: SNRIs (duloxetine) versus placebo; Subgroup analysis: Proportion of patients with a meaningful response to treatment, analyzed by study funding source (public or industry funding) (Post hoc analysis) ....                                                                       | 38        |
| Figure 7.4: SNRIs (duloxetine) versus placebo; Subgroup analysis: Proportion of patients with a meaningful response to treatment, analyzed by median risk of bias (less than the median risk of bias score or greater than or equal to the median risk of bias score) (post hoc analysis)..... | 38        |
| <b>Corticosteroid Injections .....</b>                                                                                                                                                                                                                                                         | <b>39</b> |
| Figure 8.1: Corticosteroid injections versus saline injections; Outcome: Proportion of patients with a meaningful response to treatment. ....                                                                                                                                                  | 39        |
| Figure 8.2: Corticosteroid injections versus saline injections; Outcome: Proportion of patients with a meaningful response to treatment at 4 weeks or less.....                                                                                                                                | 39        |
| Figure 8.3: Corticosteroid injections versus saline injections; Outcome: Outcome: Proportion of patients with a meaningful response to treatment at 12 weeks or greater. ....                                                                                                                  | 39        |
| Figure 8.4: Corticosteroid injections versus saline injections; Subgroup analysis: Proportion of patients with a meaningful response to treatment, analyzed by study funding source (public or industry funding).....                                                                          | 40        |
| Figure 8.5: Corticosteroid injections versus saline injections; Subgroup analysis: Proportion of patients with a meaningful response to treatment, analyzed by median risk of bias (less than the median risk of bias score or greater than or equal to the median risk of bias score).....    | 40        |
| <b>Post Hoc Analysis.....</b>                                                                                                                                                                                                                                                                  | <b>41</b> |
| <b>I. Fixed Effects Analysis.....</b>                                                                                                                                                                                                                                                          | <b>41</b> |
| Figure 9.1: Exercise versus no exercise; Outcome: Proportion of patients with a meaningful response to treatment (fixed effects analysis) .....                                                                                                                                                | 41        |
| Figure 9.2: Acupuncture versus control; Outcome: Proportion of patients with a meaningful response to treatment (fixed effects analysis) .....                                                                                                                                                 | 41        |
| Figure 9.3: Spinal Manipulation versus control; Outcome: Proportion of patients with a meaningful response to treatment Oral NSAIDs (fixed effects analysis).....                                                                                                                              | 42        |
| Figure 9.4: Oral NSAIDs versus placebo; Outcome: Proportion of patients with a meaningful response to treatment (fixed effects analysis) .....                                                                                                                                                 | 42        |
| Figure 9.5: Rubefacients versus placebo; Outcome: Proportion of patients with a meaningful response to treatment (fixed effects analysis) .....                                                                                                                                                | 42        |
| Figure 9.6: Opioids versus placebo; Outcome: Proportion of patients with a meaningful response to treatment (fixed effects analysis) .....                                                                                                                                                     | 43        |
| Figure 9.7: SNRIs (duloxetine) versus placebo; Outcome: Proportion of patients with a meaningful response to treatment (fixed effects analysis) .....                                                                                                                                          | 43        |
| Figure 9.8: Corticosteroid injections versus saline injections; Outcome: Proportion of patients with a meaningful response to treatment (fixed effects analysis) .....                                                                                                                         | 44        |
| <b>II. Subgroup analysis by control group characteristics (sham versus non-sham procedures or prescribed versus passive exercise controls) .....</b>                                                                                                                                           | <b>45</b> |
| Figures 10.1: Exercise versus no exercise; Subgroup analysis: Proportion of patients with a meaningful response to treatment, analyzed by control group characteristics (prescribed versus passive exercise controls) .....                                                                    | 45        |

|                                                                                                                                                                                                                                     |           |
|-------------------------------------------------------------------------------------------------------------------------------------------------------------------------------------------------------------------------------------|-----------|
| Figure 10.2: Acupuncture versus control; Subgroup analysis: Proportion of patients with a meaningful response to treatment, analyzed by control group characteristics (sham versus non-sham procedures).....                        | 46        |
| Figure 10.3: Spinal Manipulation versus control; Subgroup analysis: Proportion of patients with a meaningful response to treatment, analyzed by control group characteristics (sham versus non-sham procedures).....                | 46        |
| <b>III. Subgroup analysis by trial size .....</b>                                                                                                                                                                                   | <b>47</b> |
| Figures 11.1: Exercise versus no exercise; Subgroup analysis: Proportion of patients with a meaningful response to treatment, analyzed by study size (<150 participants compared to ≥150 participants).....                         | 47        |
| Figures 11.2: Acupuncture versus control; Subgroup analysis: Proportion of patients with a meaningful response to treatment, analyzed by study size (<150 participants compared to ≥150 participants).....                          | 48        |
| Figures 11.3: Spinal Manipulation versus control; Subgroup analysis: Proportion of patients with a meaningful response to treatment, analyzed by study size (<150 participants compared to ≥150 participants).....                  | 48        |
| Figures 11.4: Oral NSAIDs versus placebo; Subgroup analysis: Proportion of patients with a meaningful response to treatment, analyzed by study size (<150 participants compared to ≥150 participants).....                          | 49        |
| Figures 11.5: Rubefaciants versus placebo; Subgroup analysis: Proportion of patients with a meaningful response to treatment, analyzed by study size (<150 participants compared to ≥150 participants).....                         | 49        |
| Figures 11.6: Opioids versus placebo; Subgroup analysis: Proportion of patients with a meaningful response to treatment, analyzed by study size (<150 participants compared to ≥150 participants) .....                             | 50        |
| Figures 11.7: SNRI (duloxetine) versus placebo; Subgroup analysis: Proportion of patients with a meaningful response to treatment, analyzed by study size (<150 participants compared to ≥150 participants).....                    | 50        |
| Figures 11.8: Corticosteroid Injections versus saline injections; Subgroup analysis: Proportion of patients with a meaningful response to treatment, analyzed by study size (<150 participants compared to ≥150 participants) ..... | 51        |
| <b>Adverse Events .....</b>                                                                                                                                                                                                         | <b>52</b> |
| <b>Table 7: Overall Adverse Events .....</b>                                                                                                                                                                                        | <b>52</b> |
| <b>Data Analysis of Adverse Events .....</b>                                                                                                                                                                                        | <b>68</b> |
| <b>Oral NSAIDs .....</b>                                                                                                                                                                                                            | <b>68</b> |
| Figure 12.1 Oral NSAIDs versus placebo; Withdrawals due to Adverse Events .....                                                                                                                                                     | 68        |
| Figure 12.2 Oral NSAIDs versus placebo; Serious Adverse Events .....                                                                                                                                                                | 68        |
| Figure 12.3 Oral NSAIDs versus placebo; Adverse Event: Edema .....                                                                                                                                                                  | 68        |
| Figure 12.4 Oral NSAIDs versus placebo; Adverse Event: Headache .....                                                                                                                                                               | 68        |
| Figure 12.5 Oral NSAIDs versus placebo; Adverse Event: Upper Respiratory Infection.....                                                                                                                                             | 69        |
| <b>Rubefaciants.....</b>                                                                                                                                                                                                            | <b>69</b> |
| Figure 13.1 Rubefaciants versus placebo; Adverse Event: Heat Sensation .....                                                                                                                                                        | 69        |
| Figure 13.2 Rubefaciants versus placebo; Adverse Event: Pruritus.....                                                                                                                                                               | 69        |
| <b>Opioids .....</b>                                                                                                                                                                                                                | <b>69</b> |
| Figure 14.1 Opioids versus placebo; Withdrawals due to Adverse Events .....                                                                                                                                                         | 69        |
| Figure 14.2 Opioids versus placebo; Serious Adverse Events .....                                                                                                                                                                    | 70        |
| Figure 14.3 Opioids versus placebo; Adverse Event: Constipation .....                                                                                                                                                               | 70        |
| Figure 14.4 Opioids versus placebo; Adverse Event: Diarrhea .....                                                                                                                                                                   | 70        |
| Figure 14.5 Opioids versus placebo; Adverse Event: Dizziness .....                                                                                                                                                                  | 70        |
| Figure 14.6 Opioids versus placebo; Adverse Event: Dry Mouth .....                                                                                                                                                                  | 70        |
| Figure 14.7 Opioids versus placebo; Adverse Event: Dyspepsia .....                                                                                                                                                                  | 71        |
| Figure 14.8 Opioids versus placebo; Adverse Event: Fatigue.....                                                                                                                                                                     | 71        |
| Figure 14.9 Opioids versus placebo; Adverse Event: Headache .....                                                                                                                                                                   | 71        |
| Figure 14.10 Opioids versus placebo; Adverse Event: Hyperhidrosis .....                                                                                                                                                             | 71        |
| Figure 14.11 Opioids versus placebo; Adverse Event: Insomnia.....                                                                                                                                                                   | 72        |
| Figure 14.12 Opioids versus placebo; Adverse Event: Nausea .....                                                                                                                                                                    | 72        |
| Figure 14.13 Opioids versus placebo; Adverse Event: Pruritis.....                                                                                                                                                                   | 72        |

|                                                                                                                                                                            |                                     |
|----------------------------------------------------------------------------------------------------------------------------------------------------------------------------|-------------------------------------|
| Figure 14.14 Opioids versus placebo; Adverse Event: Somnolence.....                                                                                                        | 72                                  |
| Figure 14.15 Opioids versus placebo; Adverse Event: Vomiting.....                                                                                                          | 73                                  |
| <b>SNRI (Duloxetine) .....</b>                                                                                                                                             | <b>73</b>                           |
| Figure 15.1 SNRI (Duloxetine) versus placebo; Withdrawals due to Adverse Events .....                                                                                      | 73                                  |
| Figure 15.2 SNRI (Duloxetine) versus placebo; Serious Adverse Events .....                                                                                                 | 73                                  |
| Figure 15.3 SNRI (Duloxetine) versus placebo; Adverse Event: Constipation .....                                                                                            | 73                                  |
| Figure 15.4 SNRI (Duloxetine) versus placebo; Adverse Event: Dizziness.....                                                                                                | 74                                  |
| Figure 15.5 SNRI (Duloxetine) versus placebo; Adverse Event: Dry Mouth.....                                                                                                | 74                                  |
| Figure 15.6 SNRI (Duloxetine) versus placebo; Adverse Event: Nausea .....                                                                                                  | 74                                  |
| <b>Funnel Plots.....</b>                                                                                                                                                   | <b>75</b>                           |
| <b>Funnel plots were generated via RevMan for interventions with ≥8 studies. This information was used in the GRADE process to assess potential publication bias. ....</b> | <b>75</b>                           |
| Figure 17.1 Exercise studies .....                                                                                                                                         | 75                                  |
| Figure 17.2 Acupuncture studies .....                                                                                                                                      | 75                                  |
| Figure 17.3 Corticosteroid Injection studies .....                                                                                                                         | 76                                  |
| <b>Quality Assessment .....</b>                                                                                                                                            | <b>77</b>                           |
| <b>Cochrane Risk of Bias tables.....</b>                                                                                                                                   | <b>77</b>                           |
| Risk of Bias Assessment .....                                                                                                                                              | <b>Error! Bookmark not defined.</b> |
| Table 8.1 Exercise.....                                                                                                                                                    | 78                                  |
| Table 8.2 Acupuncture .....                                                                                                                                                | 78                                  |
| Table 8.3 Spinal manipulation.....                                                                                                                                         | 79                                  |
| Table 8.4 Oral NSAIDs .....                                                                                                                                                | 79                                  |
| Table 8.5 Rubefacients.....                                                                                                                                                | 80                                  |
| Table 8.6 Opioids.....                                                                                                                                                     | 80                                  |
| Table 8.7 SNRI (Duloxetine) .....                                                                                                                                          | 81                                  |
| <b>Table 9: GRADE Evaluation of Evidence Quality .....</b>                                                                                                                 | <b>82</b>                           |
| <b>Peer Review Comments/Feedback.....</b>                                                                                                                                  | <b>83</b>                           |
| <b>References.....</b>                                                                                                                                                     | <b>86</b>                           |

**Table 1: Low Back Pain Outcomes Hierarchy**

- This hierarchy outlines the priority of outcomes used for overall meta-analyses presented in the systematic review.
  - **When there are studies that report a scale change on:** Pain only or pain and function, we would prefer to use assessments on pain only. We are not including assessments or responder analyses that only focus on function.
    - **Rationale:** As clinicians we understand function is crucial however, we also know that pain is the presenting issue for patients. Therefore, we wanted to develop information around pain to allow for shared decision-making with our patients.
1. Percent improvement on a pain scale that is closest to 30% improvement
    - a. If there is a tie, eg. 25% and 35% improvement, we would use the higher number.
  2. Clinically meaningful change on any low back pain scale (e.g. Minimally Clinical Important Change on a Roland Morris Back Pain Scale)
    - a. This includes achieving a particular back pain scale score that reaches a certain threshold on the low back pain scale at the study endpoint.
  3. Change of **at least** 1 on a VAS / NRS scale (out of 11 or 10); Or change of  $\geq 10$  on a VAS/NRS (out of scale 100).
    - a. If multiple outcomes included are reported, order of preference is:
      - i.  $\geq 2$  change on VAS/NRS out of 10-11 or change of  $\geq 20$  on VAS/NRS out of 100.
      - ii.  $\geq 3$  change on VAS/NRS out of 10-11 or change of  $\geq 30$  on VAS/NRS out of 100.
      - iii.  $\geq 1$  change on VAS / NRS out of 10-11 or change of  $\geq 10$  on VAS / NRS out of 100.

**Note:** Change of at least 2 is preferred because if an average baseline pain of 5-6 is seen, a change of 2 would be closest to a 30% improvement in change.
  4. Reaching a score of  $\leq 4$  on VAS / NRS scale (out of 11 or 10); Or score of  $\leq 40$  on a VAS/NRS (out of scale 100).
    - a. If multiple is present, order of preference is:
      - i. Reaching a score of  $\leq 4$  on VAS / NRS scale (out of 11 or 10); Or score of  $\leq 40$  on a VAS/NRS (out of scale 100).
      - ii. Reaching a score of  $\leq 3$  on VAS / NRS scale (out of 11 or 10); Or score of  $\leq 30$  on a VAS/NRS (out of scale 100).
      - iii. Reaching a score of  $\leq 2$  on VAS / NRS scale (out of 11 or 10); Or score of  $\leq 20$  on a VAS/NRS (out of scale 100).
      - iv. Reaching a score of  $\leq 1$  on VAS / NRS scale (out of 11 or 10); Or score of  $\leq 10$  on a VAS/NRS (out of scale 100).

**Note:** Reaching a score of  $< 4/10$  is preferred because if an average baseline pain of 5-6/10 is seen, obtaining a score of 4 or less would be closest to a 30% improvement in change.

5. Change in a scale that are out of a score not mentioned above (example out of 20). (We will have to adjust so it comes close to that 30% improvement.)
6. Patient Global Assessment of Change / Improvement (eg. None/Slight/Moderate/Very Good/Excellent (or similar language).
  - a. If multiple outcomes involving the assessment is available or calculatable, preference is:
    - i. Patients achieving at least a **moderate/good** (or similar wording) or greater change.
    - ii. Patients achieving at least a **very good** (or similar wording) or greater change.
    - iii. Patients achieving at least an **excellent** (or similar wording) or greater change.
  - b. Notes:
    - i. **We are not including caregiver or clinician assessment of change.**
    - ii. If there is an undefined % improved as determined by **patient** we would include.
    - iii. There may be times when authors need to combine raw event numbers to obtain the above pre-specified outcomes, this would occur following data extraction step.



**Table 2: Included Randomized Controlled Trials**

Interventions are listed in alphabetical order.

| Intervention Type | Author, Year   | Sample Size | Duration of Back Pain (weeks) | Mean Age | Outcome Measured At | Intervention(s), Comparator(s)                                                                                                                                                                                  | Outcome used in Meta-Analysis                                                                                                                                                                                          |
|-------------------|----------------|-------------|-------------------------------|----------|---------------------|-----------------------------------------------------------------------------------------------------------------------------------------------------------------------------------------------------------------|------------------------------------------------------------------------------------------------------------------------------------------------------------------------------------------------------------------------|
| Acupuncture       | Brinkhaus 2006 | 219         | 764 weeks                     | 59       | 8 weeks             | Acupuncture; 12, 30-minute sessions<br>Minimal Acupuncture; 12, 30-minute sessions                                                                                                                              | At least 50% reduction in pain intensity                                                                                                                                                                               |
| Acupuncture       | Cherkin 2009   | 638         | Not reported                  | 47       | 8 weeks             | Individualized acupuncture; 10 sessions<br>Standardized Acupuncture; 10 sessions<br>Simulated Acupuncture; 10 sessions<br>Usual Care including self-help book                                                   | Proportion of patients with MCID in pain (decrease in symptom bothersome scale by 2 or greater)                                                                                                                        |
| Acupuncture       | Coan 1980      | 50          | 468 weeks                     | 47       | 10 weeks            | Acupuncture<br>Waitlist                                                                                                                                                                                         | PGIC rated "improved" (decrease in $\geq 2$ on 10-point scale)                                                                                                                                                         |
| Acupuncture       | Haake 2007     | 1162        | 395 weeks                     | 49       | 24 weeks            | Verum Acupuncture; 10, 30-minute sessions<br>Sham Acupuncture; 10, 30-minute sessions                                                                                                                           | 33% or greater improvement on 3 pain-related items on the Von Korff Chronic Pain Grade Scale or 12% improvement or greater on back-specific functional status measured by the Hanover Functional Ability Questionnaire |
| Acupuncture       | Hunter 2011    | 51          | 515 weeks                     | 43       | 24 weeks            | Auricular Acupuncture; provided prior to each exercise class and to be removed in 48 hours + Exercise (see below)<br>Exercise; physiotherapy-delivered for 6 weeks followed by 6 weeks of unsupervised exercise | Proportion of patients achieving a MCID (8% change on Oswestry Disability Questionnaire)                                                                                                                               |
| Acupuncture       | Kerr 2003      | 60          | 303 weeks                     | 41       | 24 weeks            | Acupuncture; 6, 30-minute sessions<br>Placebo-TENS (no elec); 6, 30-minute sessions                                                                                                                             | Proportion of patients who experienced pain relief                                                                                                                                                                     |

|                                  |                 |      |              |    |          |                                                                                                                                                                                                                                                                                           |                                                                                                 |
|----------------------------------|-----------------|------|--------------|----|----------|-------------------------------------------------------------------------------------------------------------------------------------------------------------------------------------------------------------------------------------------------------------------------------------------|-------------------------------------------------------------------------------------------------|
| <b>Acupuncture</b>               | Meng 2003       | 51   | 624 weeks    | 71 | 6 weeks  | Acupuncture + Standard Therapy; 10 sessions<br>Standard Therapy                                                                                                                                                                                                                           | PGIC rated “much better”                                                                        |
| <b>Acupuncture</b>               | Molsberger 1998 | 186  | 515 weeks    | 50 | 4 weeks  | Verum Acupuncture + Conventional Orthopedic Therapy (see below)<br>Sham + Conventional Orthopedic Therapy; 12, 30-minute sessions                                                                                                                                                         | 50% reduction in VAS                                                                            |
| <b>Acupuncture</b>               | Qin 2019        | 80   | Not reported | 62 | 8 weeks  | Acupuncture; 24, 30-minute sessions<br>Sham Acupuncture; 24, 30-minute sessions                                                                                                                                                                                                           | Proportion of patients with a 30% or more improvement in Roland Morris Disability Questionnaire |
| <b>Acupuncture</b>               | Witt 2006       | 2841 | 374 weeks    | 53 | 12 weeks | Acupuncture; maximum 15 sessions<br>Waitlist                                                                                                                                                                                                                                              | Proportion of patients who improved $\geq 20\%$ in “back function loss”)                        |
| <b>Anticonvulsants</b>           |                 |      |              |    |          |                                                                                                                                                                                                                                                                                           |                                                                                                 |
| <b>Anticonvulsants</b>           | Atkinson 2016   | 108  | 910 weeks    | 56 | 12 weeks | Gabapentin (mean 3265 mg)<br>Placebo                                                                                                                                                                                                                                                      | 30% Improvement in Pain                                                                         |
| <b>Corticosteroid Injections</b> |                 |      |              |    |          |                                                                                                                                                                                                                                                                                           |                                                                                                 |
| <b>Corticosteroid Injections</b> | Arden 2005      | 228  | NR           | 44 | 52 weeks | Corticosteroid Injections (Weeks 0,3,6)<br>Saline Injections (Weeks 0,3,6)                                                                                                                                                                                                                | $\geq 75\%$ improvement in Oswestry Disability Questionnaire                                    |
| <b>Corticosteroid Injections</b> | Carette 1997    | 158  | 13 weeks     | 40 | 12 weeks | Epidural Corticosteroid (methylprednisolone) Injections (Up to 3) – Could be at 0,3,6 weeks and depended if no marked improvement or Oswestry Disability Questionnaire $>20$ seen.<br><br>Saline Injections - Could be at 0,3,6 weeks                                                     | Oswestry Disability Questionnaire $\leq 20$ points                                              |
| <b>Corticosteroid Injections</b> | Ghahreman 2010  | 23   | 67 weeks     | 45 | 4 weeks  | Bupivacaine 0.5% followed with Corticosteroid Injection (Triamcinolone) – (Up to 3 injections, repeat injections offered if 1 <sup>st</sup> thought to be beneficial)<br><br>Bupivacaine 0.5% (Up to 3 injections, repeat injections offered if 1 <sup>st</sup> thought to be beneficial) | $\geq 50\%$ improvement 1 month after treatment                                                 |

|                                  |                   |     |           |    |           |                                                                                                                                                                                                                                                                                                                                        |                                                       |
|----------------------------------|-------------------|-----|-----------|----|-----------|----------------------------------------------------------------------------------------------------------------------------------------------------------------------------------------------------------------------------------------------------------------------------------------------------------------------------------------|-------------------------------------------------------|
| <b>Corticosteroid Injections</b> | Ghai 2015         | 69  | 82 weeks  | 45 | 52 weeks  | Lidocaine 0.5% mixed with Corticosteroid Injection (Methylprednisolone) – Multiple Injections Offered if deterioration of pain relief was <50% - Need to be spaced at least 15 days apart<br><br>Lidocaine 0.5% Only - Multiple Injections Offered if deterioration of pain relief was <50% - Need to be spaced at least 15 days apart | ≥50% improvement from baseline                        |
| <b>Corticosteroid Injections</b> | Manchikanti 2012  | 100 | 399 weeks | 56 | 52 weeks  | Epidural Injections (Lidocaine 0.5% mixed with Betamethasone) – multiple injections offered<br><br>Lidocaine 0.5% Only – multiple injections offered                                                                                                                                                                                   | ≥50 pain relief and functional status improvement     |
| <b>Corticosteroid Injections</b> | Manchikanti 2012a | 120 | 384 weeks | 46 | 104 weeks | Lidocaine 0.5% mixed with Corticosteroid Injection (Methylprednisolone or betamethasone) – Multiple Injections Offered if deterioration of pain relief was <50%<br><br>Lidocaine 0.5% Only - Multiple Injections Offered if deterioration of pain relief was <50%                                                                      | ≥50 pain relief and functional status improvement     |
| <b>Corticosteroid Injections</b> | Manchikanti 2014  | 120 | 405 weeks | 43 | 104 weeks | Injection of local anesthetic and Corticosteroid (betamethasone) – Around 6 procedures in 104 weeks<br><br>Injection of local anesthetic only – Around 6 procedures in 104 weeks                                                                                                                                                       | ≥50% reduction in pain and Oswestry disability index  |
| <b>Corticosteroid Injections</b> | Ng 2005           | 86  | 58 weeks  | 51 | 12 weeks  | Single Injection Corticosteroid (Methylprednisolone) and Bupivacaine<br><br>Single Injection Bupivacaine                                                                                                                                                                                                                               | At least a 10% reduction in Oswestry Disability Index |

|                                  |                 |     |              |    |          |                                                                                                                                                             |                                                                                        |
|----------------------------------|-----------------|-----|--------------|----|----------|-------------------------------------------------------------------------------------------------------------------------------------------------------------|----------------------------------------------------------------------------------------|
| <b>Corticosteroid Injections</b> | Nguyen 2017     | 135 | 330 weeks    | 47 | 4 weeks  | Single Injection Contrast and Corticosteroid (Prednisolone)<br><br>Single Injection Contrast Dye Only                                                       | Low back pain intensity <40 on 11 Numerical Rating Scale (0-100 in 10point increments) |
| <b>Corticosteroid Injections</b> | Saqib 2016      | 109 | 60 weeks     | NR | 4 weeks  | Single Injection Corticosteroid (Methylprednisolone) and Bupivacaine<br><br>Single Injection Bupivacaine                                                    | Achieved a moderate disability score (Oswestry Disability Index of 21-40%)             |
| <b>Exercise</b>                  | Albaladejo 2010 | 348 | Not Reported | 52 | 12 weeks | Four, 1-hour group exercise sessions with physical therapist + Back Book<br>Back Book + 15-minute group talk                                                | Evolution of low back pain: Disappeared or Improved                                    |
| <b>Exercise</b>                  | Brandt 2015     | 13  | 208 weeks    | 30 | 12 weeks | Physical Therapy-delivered core strengthening for 4 days/week<br>Usual activity                                                                             | MCID in numerical pain scale (Change of 2 or more)                                     |
| <b>Exercise</b>                  | Brodsky 2019    | 69  | Not reported | 49 | 12 weeks | Group stretching program, once weekly for 15-30 minutes<br>Self-care book with weekly emails for follow-up                                                  | At least 50% reduction in Roland Morris Disability Questionnaire                       |
| <b>Exercise</b>                  | Chan 2017       | 96  | 14 weeks     | 42 | 10 weeks | Physiotherapy-delivered individualized functional restoration, one weekly for 30 minutes<br>Physiotherapy advice delivered in two, 30-minute sessions       | Reduced pain at least 50% on numerical pain scale                                      |
| <b>Exercise</b>                  | Costa 2009      | 154 | 332 weeks    | 54 | 52 weeks | Physiotherapy-delivered motor control exercises, 12, 30-minute sessions<br>Detuned shortwave diathermy and ultrasound delivered over 12, 30-minute sessions | Pain Free (Recovered)                                                                  |
| <b>Exercise</b>                  | Cox 2010        | 20  | 588 weeks    | 45 | 12 weeks | Yoga classes delivered once weekly for 75 minutes + Back Book + Usual Care<br>Back Book + Usual Care                                                        | Roland Disability Questionnaire: At least 2 point improvement                          |
| <b>Exercise</b>                  | Ford 2016       | 300 | 15 weeks     | 44 | 10 weeks | Individualized physiotherapy delivered once weekly for 30 minute sessions + Advice<br>Advice delivered in two, 30 minute sessions                           | Reduced pain by $\geq$ 50% on numerical pain scale                                     |

|                 |                 |     |              |    |          |                                                                                                                                                                                     |                                                                                         |
|-----------------|-----------------|-----|--------------|----|----------|-------------------------------------------------------------------------------------------------------------------------------------------------------------------------------------|-----------------------------------------------------------------------------------------|
| <b>Exercise</b> | Frost 2004      | 286 | Not Reported | 41 | 8 weeks  | Physiotherapy-delivered exercise; patients received a median of 5 sessions (range 1-12) averaging 30 minutes in length<br>Advice to stay active delivered in one, 30-minute session | Patient perceived benefit (benefit versus no benefit)                                   |
| <b>Exercise</b> | Groessl 2017    | 150 | 780 weeks    | 53 | 12 weeks | Yoga delivered twice a week for 60-minutes a session + Usual Care<br>Delayed Yoga + Usual Care                                                                                      | 30% decrease in Roland Morris Disability Questionnaire                                  |
| <b>Exercise</b> | Hall 2011       | 160 | Not reported | 44 | 10 weeks | Tai Chi; 18, 40-minute sessions + Usual Care<br>Waitlist + Usual Care                                                                                                               | At least 30% improvement in pain                                                        |
| <b>Exercise</b> | Hartvigsen 2010 | 136 | Not reported | 47 | 10 weeks | Supervised Nordic Walking; 16, 45-minute sessions<br>Unsupervised Nordic Walking<br>Advice Only                                                                                     | Proportion of patients achieving an MCID on low back pain rating scale (LBPRS)          |
| <b>Exercise</b> | Highland 2018   | 68  | Not reported | 44 | 8 weeks  | Therapeutic Yoga; 12, 60-minute sessions<br>Treatment as usual                                                                                                                      | Proportion of patients reporting MCID (2 point on 11-point scale or 30% reduction)      |
| <b>Exercise</b> | Jensen 2012     | 100 | Not reported | 46 | 10 weeks | Physiotherapy-delivered group exercise; once weekly for 10, 60-minute sessions<br>Rest (avoid physical activity and to rest twice daily for one hour)                               | Achieved a MCID in pain                                                                 |
| <b>Exercise</b> | Moffett 1999    | 187 | Not reported | 42 | 6 weeks  | Physiotherapy-delivered exercise; 8, 60-minute sessions<br>Usual Care                                                                                                               | Minimum 3 point improvement on Roland Morris Disability Questionnaire                   |
| <b>Exercise</b> | Natour 2015     | 60  | Not reported | 48 | 12 weeks | Pilates; 24, 50-minute sessions, delivered twice weekly<br>Waitlist                                                                                                                 | PGIC rated “much better”                                                                |
| <b>Exercise</b> | Saper 2009      | 29  | Not reported | 44 | 12 weeks | Yoga; once weekly for 75 minutes + Routine Care + Education Book<br>Routine Care + Education Book                                                                                   | Proportion of patients with MCID in pain ( $\geq 2$ point decrease in pain and $\geq$ ) |
| <b>Exercise</b> | Saper 2017      | 320 | Not reported | 46 | 12 weeks | Yoga; once weekly for 75 minutes                                                                                                                                                    | At least 30% reduction in back pain                                                     |

|                    |                  |     |              |    |          |                                                                                                                                                   |                                                                           |
|--------------------|------------------|-----|--------------|----|----------|---------------------------------------------------------------------------------------------------------------------------------------------------|---------------------------------------------------------------------------|
|                    |                  |     |              |    |          | Physical Therapist-led aerobic exercise;<br>15, 60-minute sessions<br>Back Pain Help Book                                                         |                                                                           |
| <b>Exercise</b>    | Sherman<br>2005  | 101 | Not reported | 44 | 12 weeks | Yoga; once weekly for 75 minutes<br>Physical Therapist-led aerobic and<br>strength exercise; once weekly for 75<br>minutes<br>Back Pain Help Book | At least 50% reduction<br>in Roland Morris<br>Disability<br>Questionnaire |
| <b>Exercise</b>    | Sherman<br>2011  | 228 | 558 weeks    | 48 | 12 weeks | Yoga; once weekly for 75 minutes<br>Physiotherapy-led aerobic and stretching<br>exercise; once weekly for 75 minutes<br>Back Pain Help Book       | PGIC rated “better”,<br>“much better”, or<br>“completely gone”            |
|                    |                  |     |              |    |          |                                                                                                                                                   |                                                                           |
| <b>Opioids</b>     | Buynak<br>2010   | 965 | Not reported | 50 | 12 weeks | Oxycodone CR 20-50mg BID<br>Tapentadol ER 100-250mg BID<br>Placebo                                                                                | ≥30% pain relief                                                          |
| <b>Opioids</b>     | Cristoph<br>2017 | 637 | 562 weeks    | 58 | 12 weeks | Tapentadol PR 200mg BID<br>Cebranopadol 200-600mg QD<br>Placebo                                                                                   | ≥30% pain relief                                                          |
| <b>Opioids</b>     | Lee 2013         | 245 | Not reported | 60 | 4 weeks  | Tramadol/Acetaminopen ER 37.5/325mg<br>1-2tabs BID<br>Placebo                                                                                     | ≥30% pain relief                                                          |
| <b>Opioids</b>     | Uberall<br>2012  | 236 | 296 weeks    | 58 | 4 weeks  | Tramadol ER 200mg QD<br>Placebo                                                                                                                   | ≥30% pain relief                                                          |
| <b>Opioids</b>     | Peloso 2004      | 336 | Not reported | 58 | 12 weeks | Tramadol/Acetaminopen ER 37.5/325mg<br>3-8 tabs per day<br>Placebo                                                                                | ≥30% pain relief                                                          |
| <b>Opioids</b>     | Ruoff 2003       | 318 | Not reported | 54 | 12 weeks | Tramadol/Acetaminopen ER 37.5/325mg<br>1-8 tabs per day<br>Placebo                                                                                | ≥30% pain relief                                                          |
|                    |                  |     |              |    |          |                                                                                                                                                   |                                                                           |
| <b>Oral NSAIDs</b> | Coats 2004       | 293 | 585 weeks    | 49 | 4 weeks  | Valdecoxib 40 mg daily<br>Placebo                                                                                                                 | 50% reduction in pain                                                     |

|                          |                                             |     |              |    |          |                                                                                                                            |                                                            |
|--------------------------|---------------------------------------------|-----|--------------|----|----------|----------------------------------------------------------------------------------------------------------------------------|------------------------------------------------------------|
| <b>Oral NSAIDs</b>       | Katz 2011                                   | 129 | 621 weeks    | 52 | 12 weeks | Naproxen 1000 mg daily + Single IV infusion of tanezumab placebo<br>Oral placebo + Single IV infusion of tanezumab placebo | 30% reduction in low back pain                             |
| <b>Oral NSAIDs</b>       | Katz 2003                                   | 690 | 629 weeks    | 53 | 4 weeks  | Rofecoxib 25 mg daily<br>Rofecoxib 50 mg daily<br>Placebo                                                                  | PGIC rated- “good” or “excellent”                          |
| <b>Oral NSAIDs</b>       | Katz 2004 (second publication to Katz 2003) | ""  | ""           | "" | ""       | ""                                                                                                                         | Change in VAS only                                         |
| <b>Oral NSAIDs</b>       | Kivitz 2013                                 | 525 | 585 weeks    | 52 | 16 weeks | Naproxen 500 mg twice daily<br>Placebo                                                                                     | 30% reduction in pain                                      |
|                          |                                             |     |              |    |          |                                                                                                                            |                                                            |
| <b>Rubefacients</b>      | Chrubasik 2010                              | 142 | Not reported | 48 | 3 weeks  | Capsaicin 0.05% Cream<br>Placebo Cream                                                                                     | ≥30% improvement                                           |
| <b>Rubefacients</b>      | Frerick 2003                                | 319 | Not reported | NR | 3 weeks  | Capsaicin Plaster applied once daily for 4-8 hours<br>Placebo Plaster                                                      | ≥30% improvement                                           |
| <b>Rubefacients</b>      | Keitel 2001                                 | 150 | Not reported | NR | 3 weeks  | Capsaicin Plaster 11 mg applied once daily for 4-12 hours<br>Placebo Plaster                                               | ≥30% improvement                                           |
|                          |                                             |     |              |    |          |                                                                                                                            |                                                            |
| <b>SNRI (Duloxetine)</b> | Konno 2016                                  | 458 | 520 weeks    | 59 | 12 weeks | Duloxetine 60mg/day<br>Placebo                                                                                             | ≥30% reduction in pain                                     |
| <b>SNRI (Duloxetine)</b> | Skljarevski 2009                            | 404 | 608 weeks    | 54 | 13 weeks | Duloxetine 20, 60 or 120mg/day<br>Placebo                                                                                  | ≥30% reduction in pain                                     |
| <b>SNRI (Duloxetine)</b> | Skljarevski 2010                            | 401 | 442 weeks    | 54 | 12 weeks | Duloxetine 60mg/day<br>Placebo                                                                                             | ≥30% reduction in pain                                     |
| <b>SNRI (Duloxetine)</b> | Skljarevski 2010a                           | 236 | 476 weeks    | 52 | 13 weeks | Duloxetine 60-120mg/day<br>Placebo                                                                                         | ≥30% reduction brief pain index average pain from baseline |
|                          |                                             |     |              |    |          |                                                                                                                            |                                                            |

|                            |                  |     |              |    |          |                                                                                             |                                                                                           |
|----------------------------|------------------|-----|--------------|----|----------|---------------------------------------------------------------------------------------------|-------------------------------------------------------------------------------------------|
| <b>Spinal Manipulation</b> | Bialosky 2014    | 55  | 18 weeks     | 33 | 2 weeks  | Spinal Manipulation; 6 sessions<br>Sham Manipulation; 6 sessions                            | PGIC rated “good” or “excellent”                                                          |
| <b>Spinal Manipulation</b> | Bond 2020        | 29  | 176 weeks    | 24 | 3 weeks  | Spinal Manipulation; 7 sessions<br>Sham Manipulation; 7 sessions                            | Proportion of patients who met MCID (reduction of $\geq 1.25$ on 11-point VAS pain scale) |
| <b>Spinal Manipulation</b> | Ford 2019        | 64  | 16 weeks     | 45 | 10 weeks | Spinal Manipulation; 10, 30-minute sessions<br>Guidance-based Advice; 2, 30-minute sessions | 50% or greater reduction in pain                                                          |
| <b>Spinal Manipulation</b> | Goertz 2017      | 83  | Not reported | 73 | 12 weeks | Spinal Manipulation (median 17.5 visits) + Medical Care<br>Medical Care; median 2 visits    | PGIC rated “completely gone”, “much better” or “moderately better”                        |
| <b>Spinal Manipulation</b> | Licciardone 2013 | 455 | Not reported | 41 | 12 weeks | Spinal Manipulation; 6, 15-minute sessions<br>Sham Manipulation; 6, 15-minute sessions      | 30% or greater reduction in pain                                                          |
|                            |                  |     |              |    |          |                                                                                             |                                                                                           |
| <b>Topical NSAIDs</b>      | Song 2008        | 127 | Not Reported | 52 | 1 week   | Flurbiprofen Tape 63 mg/day worn 12 or 24 hours<br>Placebo Tape, worn 12 or 24 hours        | PGIC rated “very much improved, much improved or improved”                                |



**Table 3: Overall proportion of patients with meaningful response and proportion at less than or equal to four weeks, four to twelve weeks and at greater than twelve weeks.**

Interventions are Ordered by Highest to Lowest Risk Ratio of Overall Efficacy.

| Intervention Type         | Number of RCTs | Subgroup                           | Intervention Event Rate          | Control Event Rate              | Risk Ratio (95% CI)                | NNT        |
|---------------------------|----------------|------------------------------------|----------------------------------|---------------------------------|------------------------------------|------------|
| Exercise                  | <b>18</b>      | <b>Overall Efficacy</b>            | <b>50%</b><br><b>(734/1472)</b>  | <b>35%</b><br><b>(386/1089)</b> | <b>RR 1.71 (95% CI 1.37, 2.15)</b> | <b>7</b>   |
|                           | 1              | Assessed at: $\leq$ 4 weeks        | 40%<br>(4/10)                    | 30%<br>(3/10)                   | RR 1.33 (95% CI 0.40, 4.49)        | NSS        |
|                           | 11             | Assessed at: >4 weeks to <12 weeks | 47%<br>(446/939)                 | 27%<br>(210/790)                | RR 2.04 (95% CI 1.66, 2.51)        | 5          |
|                           | 10             | Assessed at: $\geq$ 12 weeks       | 49%<br>(383/779)                 | 44%<br>(199/449)                | RR 1.64 (95% CI 1.16, 2.32)        | 21         |
| Acupuncture               | <b>8</b>       | <b>Overall Efficacy</b>            | <b>54%</b><br><b>(1320/2457)</b> | <b>35%</b><br><b>(754/2161)</b> | <b>RR 1.58 (95% CI 1.13, 2.21)</b> | <b>6</b>   |
|                           | 1              | Assessed at: $\leq$ 4 weeks        | 60%<br>(39/65)                   | 33%<br>(20/61)                  | RR 1.83 (95% CI 1.21, 2.76)        | 4          |
|                           | 6              | Assessed at: >4 weeks to <12 weeks | 53%<br>(501/941)                 | 50%<br>(352/710)                | RR 1.26 (0.99, 1.62)               | NSS        |
|                           | 2              | Assessed at: $\geq$ 12 weeks       | 55%<br>(1015/1838)               | 34%<br>(611/1777)               | RR 1.49 (95% CI 0.75, 2.98)        | NSS        |
| Corticosteroid Injections | <b>10</b>      | <b>Overall Efficacy</b>            | <b>48%</b><br><b>(276/581)</b>   | <b>45%</b><br><b>(257/571)</b>  | <b>RR 1.07 (95% CI 0.87, 1.30)</b> | <b>NSS</b> |
|                           | 5              | Assessed at: $\leq$ 4 weeks        | 30%<br>(99/333)                  | 22%<br>(70/324)                 | RR 1.55 (95% CI 0.93, 2.59)        | NSS        |
|                           | -              | Assessed at: >4 weeks to <12 weeks | -                                | -                               | -                                  | -          |
|                           | 7              | Assessed at: $\geq$ 12 weeks       | 50%<br>(221/446)                 | 50%<br>(217/435)                | RR 1.01 (95% CI 0.82, 1.24)        | NSS        |

RCTs: Randomized Controlled Trials; RR: Risk Ratio; CI: Confidence Interval; RR: Risk Ratio; NNT: Number Needed to Treat; NSS: Not statistically significant

**Table 4: Overall proportion of patients with meaningful response at longest follow-up point after intervention**  
Interventions ordered by Highest to Lowest Risk Ratio (RR)

| Intervention Type          | Number of RCTs | Follow-up (range in weeks)     | Intervention Event Rate | Control Event Rate | Risk Ratio (95% CI)         | NNT |
|----------------------------|----------------|--------------------------------|-------------------------|--------------------|-----------------------------|-----|
| <b>Exercise</b>            | 11             | 12-48 Weeks After Intervention | 53%<br>(526/987)        | 37%<br>(322/881)   | RR 1.58 (95% CI 1.32, 1.89) | 6   |
| <b>Acupuncture</b>         | 4              | 8-45 Weeks After Intervention  | 49%<br>(213/437)        | 40%<br>(111/277)   | RR 1.42 (0.87, 2.32)        | NSS |
| <b>Spinal Manipulation</b> | 1              | 42 Weeks After Intervention    | 61%<br>(20/33)          | 45%<br>(14/31)     | RR 1.34 (0.83, 2.16)        | NSS |

RCTs: Randomized Controlled Trials; RR: Risk Ratio; CI: Confidence Interval; RR: Risk Ratio; NNT: Number Needed to Treat; NSS: Not statistically significant

**Table 5: Proportion of patients with clinically meaningful response based on funding source (clearly publicly or industry funding)**  
Interventions ordered by Highest to Lowest Risk Ratio (RR)

| Intervention Type                | Number of RCTs | Subgroup         | Intervention Event Rate | Control Event Rate | Risk Ratio (95% CI)         | NNT | p-value Between Subgroups |
|----------------------------------|----------------|------------------|-------------------------|--------------------|-----------------------------|-----|---------------------------|
| <b>Exercise</b>                  | 17             | Public Funding   | 52% (714/1381)          | 36% (378/1044)     | RR 1.76 (95% CI 1.38, 2.23) | 7   | NA                        |
|                                  | 0              | Industry Funding | -                       | -                  | -                           | -   |                           |
| <b>Acupuncture</b>               | 7              | Public Funding   | 54% (1302/2417)         | 35% (745/2121)     | RR 1.54 (95% CI 1.08, 2.20) | 6   | NA                        |
|                                  | 0              | Industry Funding | -                       | -                  | -                           | -   |                           |
| <b>Corticosteroid Injections</b> | 7              | Public Funding   | 44% (212/478)           | 44% (205/469)      | RR 1.01 (95% CI 0.82, 1.24) | -   | NA                        |
|                                  | 0              | Industry Funding | -                       | -                  | -                           | -   |                           |

RCTs: Randomized Controlled Trials; RR: Risk Ratio; CI: Confidence Interval; RR: Risk Ratio; NNT: Number Needed to Treat; NA: Not Applicable

**Table 6: Proportion of patients with clinically meaningful response based on median risk of bias scores**

Ordered by Highest to Lowest Risk Ratio (RR).

| Intervention Type         | Number of RCTs | Subgroup                                               | Intervention Event Rate | Control Event Rate | Risk Ratio (95% CI)         | NNT | p-value |
|---------------------------|----------------|--------------------------------------------------------|-------------------------|--------------------|-----------------------------|-----|---------|
| Exercise                  | 7              | Less than the median risk of bias score                | 57% (326/569)           | 42% (253/596)      | RR 1.55 (95% CI 1.03, 2.32) | 7   | P=0.66  |
|                           | 11             | Greater than or equal to the median risk of bias score | 45% (408/903)           | 27% (133/493)      | RR 1.71 (95% CI 1.42, 2.05) | 6   |         |
| Acupuncture               | 4              | Less than the median risk of bias score                | 63% (511/807)           | 59% (386/650)      | RR 1.22 (95% CI 0.97, 1.55) | NSS | P=0.02  |
|                           | 4              | Greater than or equal to the median risk of bias score | 49% (809/1650)          | 24% (368/1511)     | RR 1.89 (95% CI 1.42, 2.51) | 5   |         |
| Corticosteroid Injections | 5              | Less than the median risk of bias score                | 56% 113/202             | 51% 102/200        | RR 1.11 (95% CI 0.78, 1.59) | NSS | P=0.73  |
|                           | 5              | Greater than or equal to the median risk of bias score | 43% 163/379             | 42% 155/371        | RR 1.03 (95% CI 0.81, 1.32) | NSS |         |

RCTs: Randomized Controlled Trials; NNT: Number Needed to Treat; NSS: Not Statistically Significant; CI: Confidence Interval; RR: Risk Ratio

## Data Analysis

### Exercise

Figure 1.1: Exercise versus no exercise; Outcome: Proportion of patients with a meaningful response to treatment.

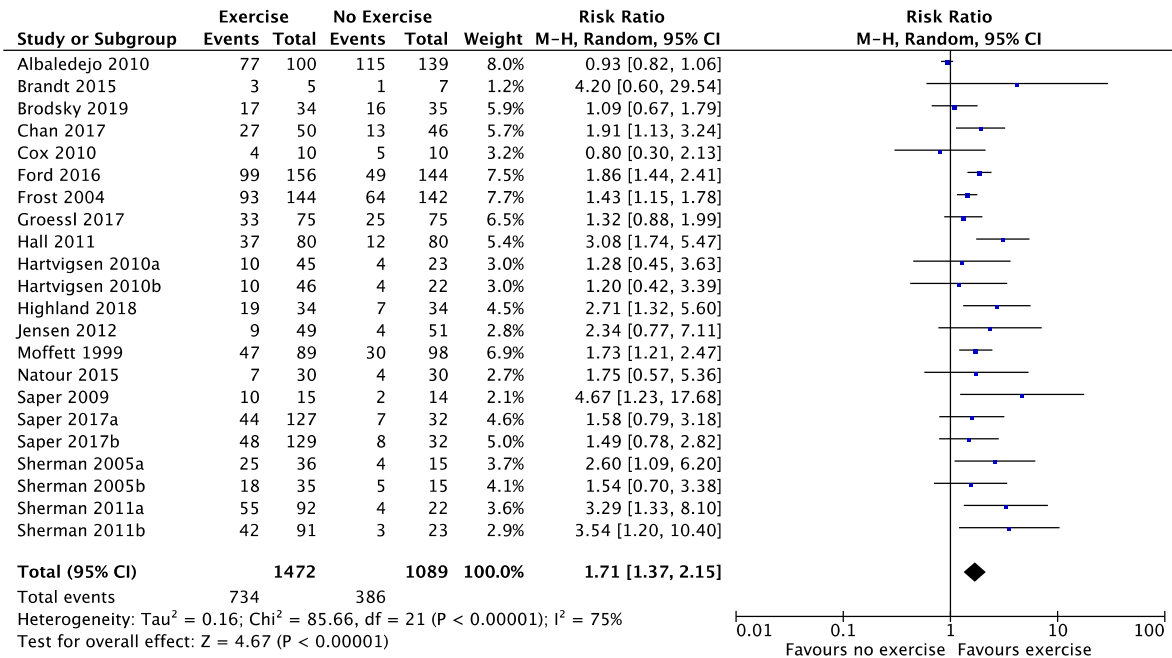

Figure 1.2: Exercise versus no exercise; Outcome: Proportion of patients with a meaningful response to treatment at 4 weeks or less.

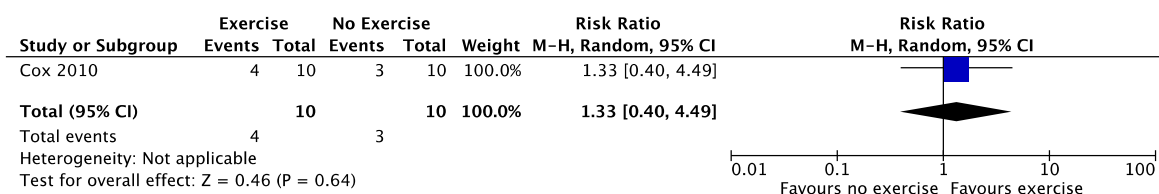

Figure 1.3: Exercise versus no exercise; Outcome: Proportion of patients with a meaningful response to treatment at greater than 4 weeks and less than 12 weeks.

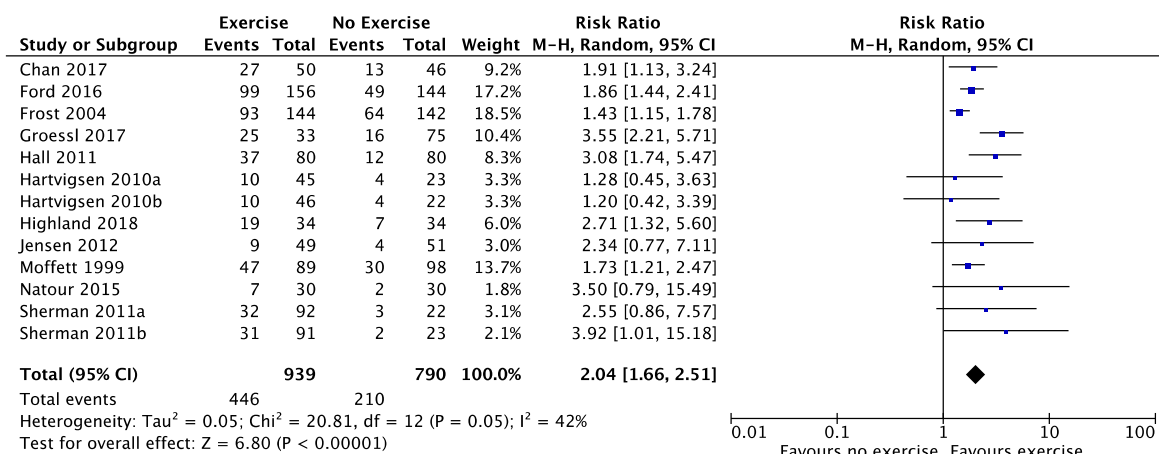

Figure 1.4: Exercise versus no exercise; Outcome: Proportion of patients with a meaningful response to treatment at 12 weeks or greater.

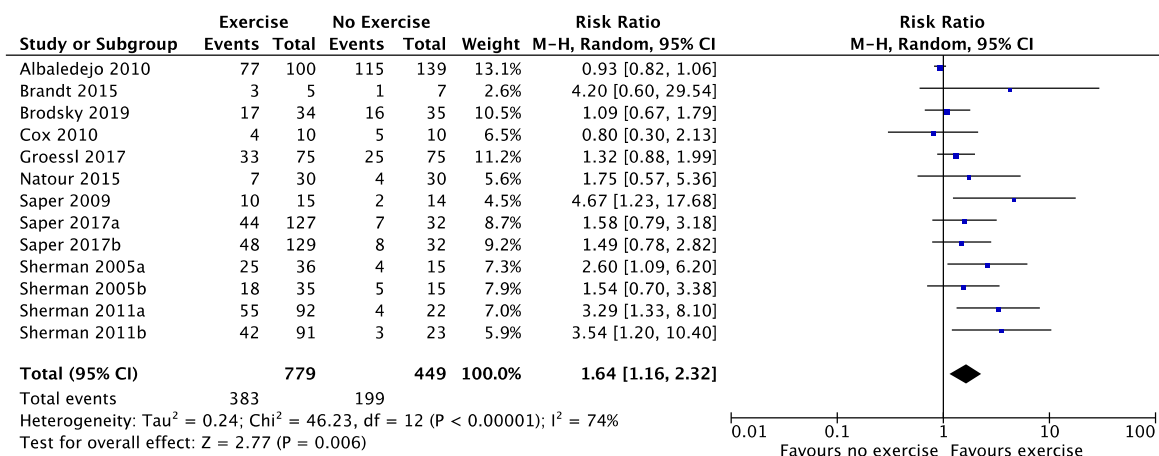

Figures 1.5: Exercise versus no exercise; Outcome: Proportion of patients with a meaningful response at longest follow up time.

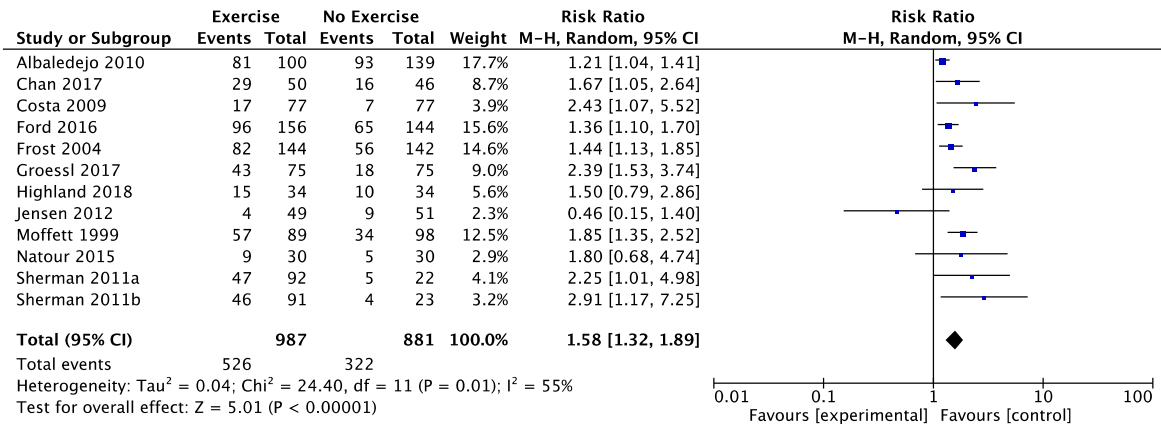

Figures 1.6: Exercise versus no exercise; Subgroup analysis: Proportion of patients with a meaningful response to treatment, analyzed by study funding source (public or industry funding)

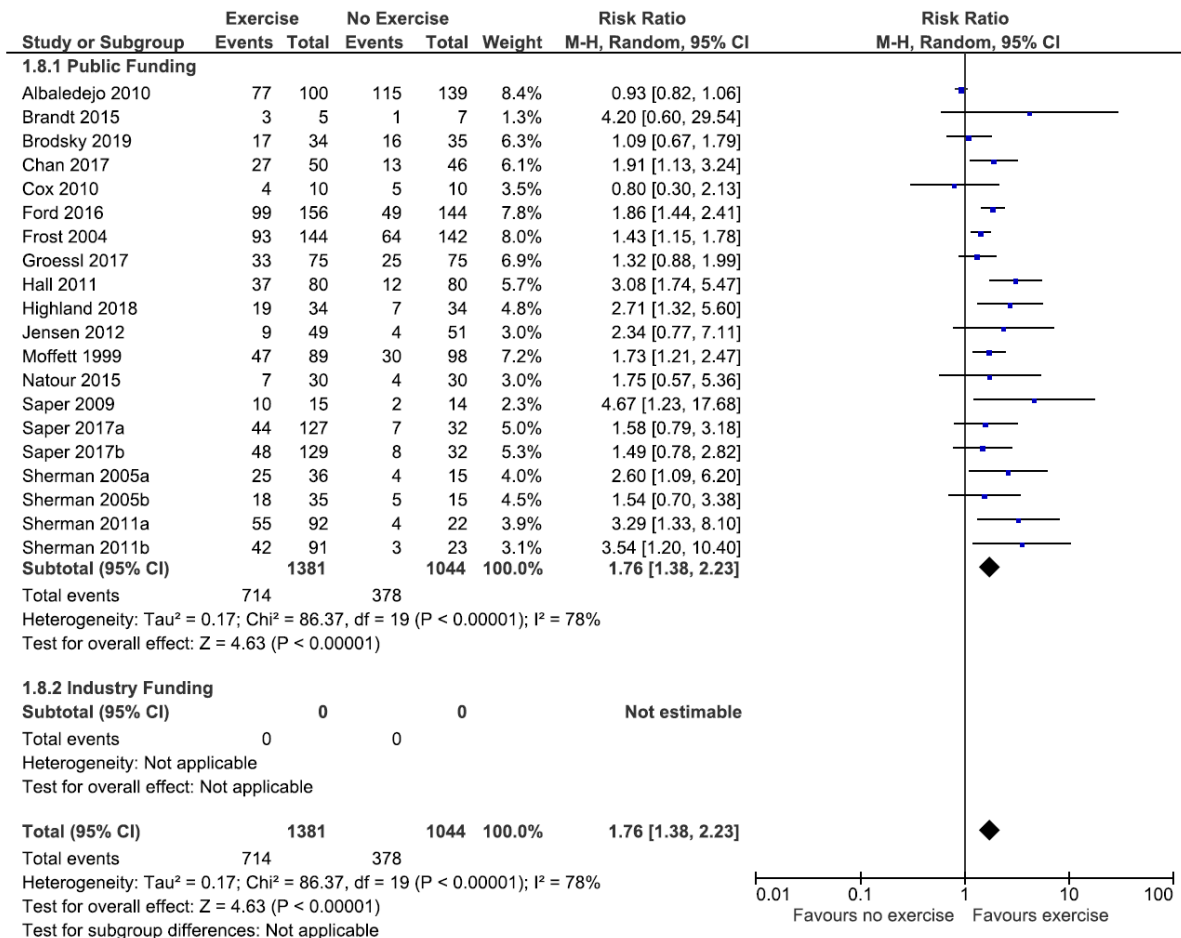

Figures 1.7: Exercise versus no exercise; Subgroup analysis: Proportion of patients with a meaningful response to treatment, analyzed by median risk of bias (less than the median risk of bias score or greater than or equal to the median risk of bias score)

For each study, the risk of bias domain was scored (0=low risk, 1=unclear risk, 2=high risk) and a median was found among all the studies within each intervention. Studies were then divided into two categories: less than the median or greater than or equal to the median. (Higgins 2011)

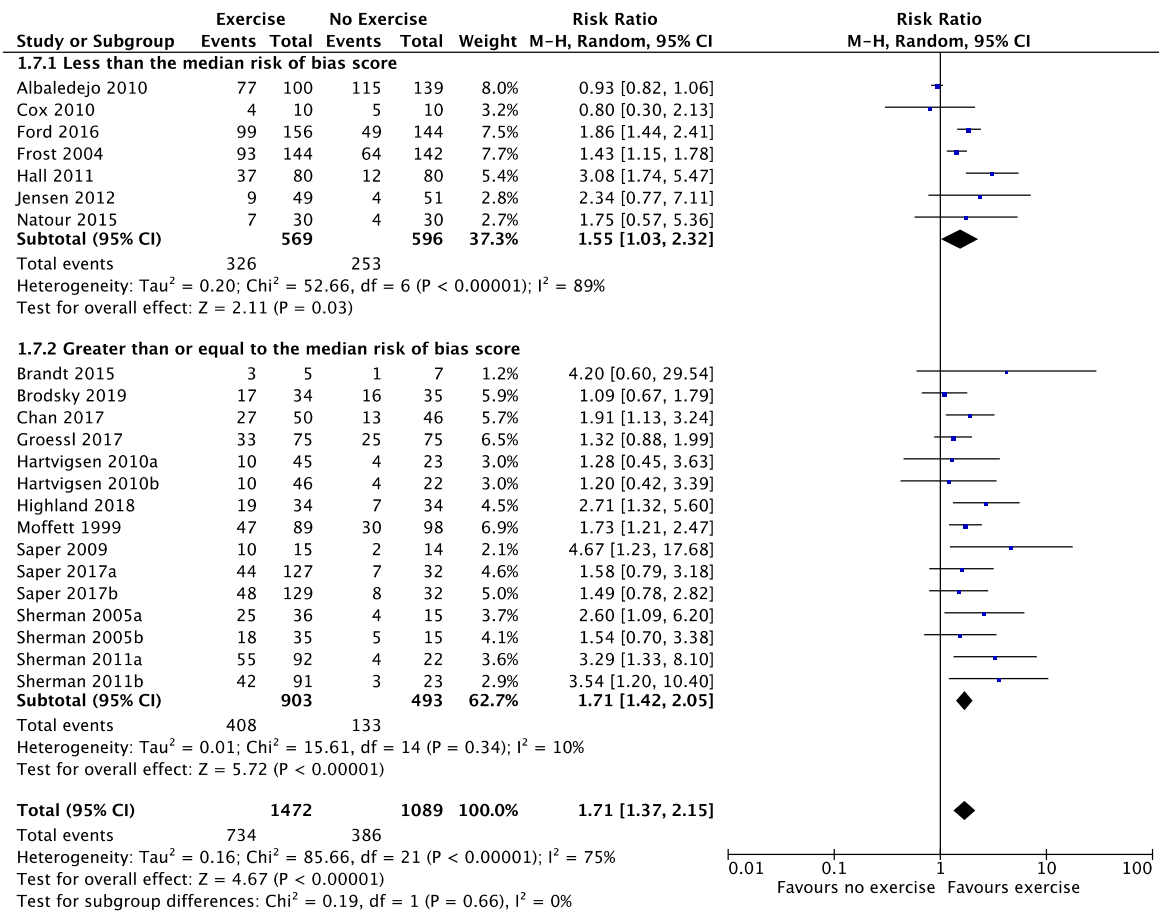



## Acupuncture

Figure 2.1: Acupuncture versus control; Outcome: Proportion of patients with a meaningful response to treatment.

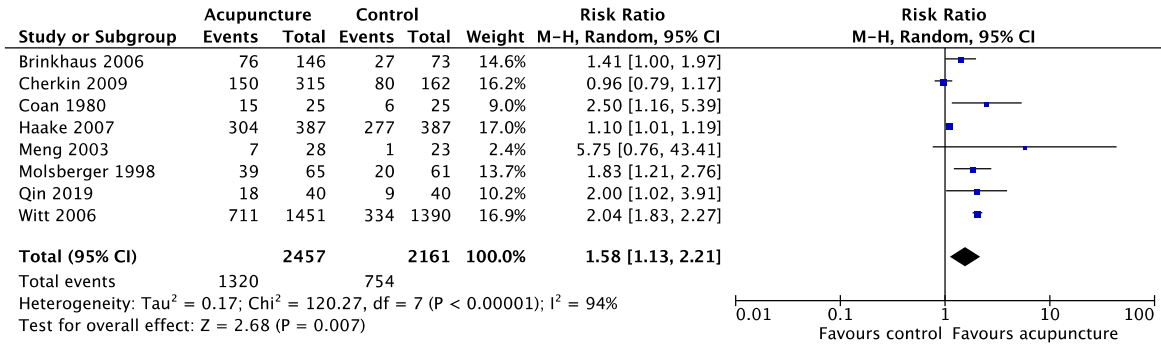

Figure 2.2: Acupuncture versus control; Outcome: Proportion of patients with a meaningful response to treatment at 4 weeks or less.

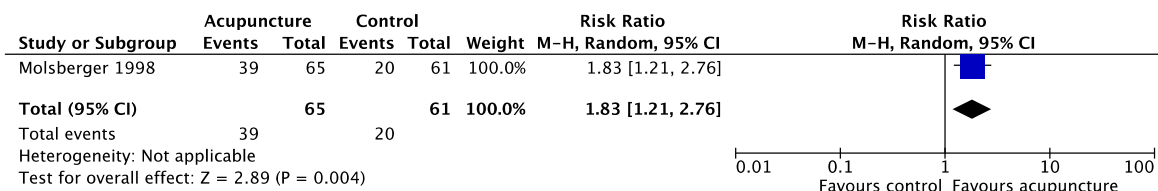

Figure 2.3: Acupuncture versus control; Outcome: Proportion of patients with a meaningful response to treatment at greater than 4 weeks and less than 12 weeks.

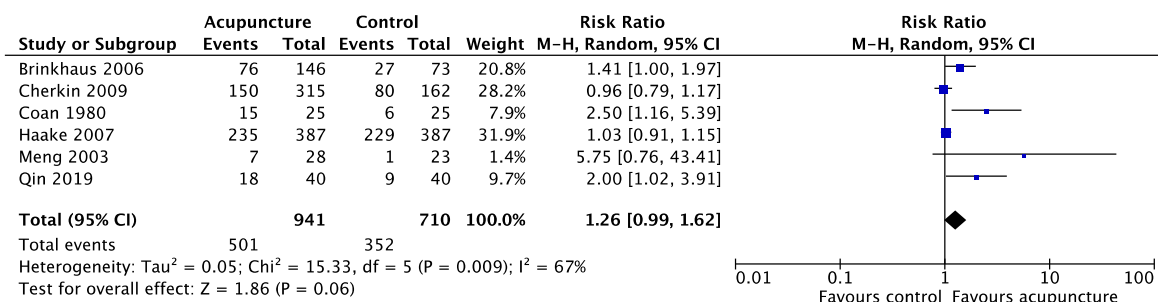

Figure 2.4: Acupuncture versus control; Outcome: Proportion of patients with a meaningful response to treatment at 12 weeks or greater.

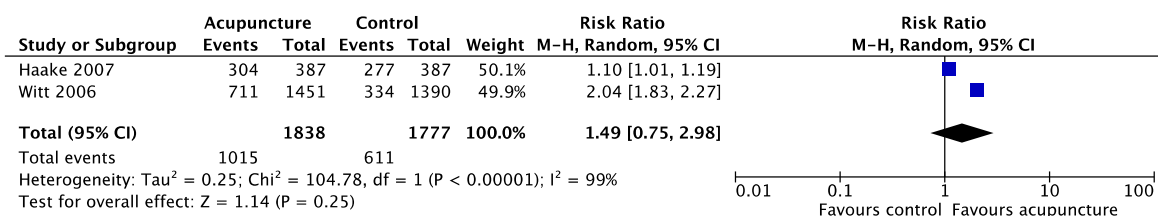

Figure 2.5: Acupuncture versus control; Outcome: Proportion of patients with a meaningful response at longest follow up time

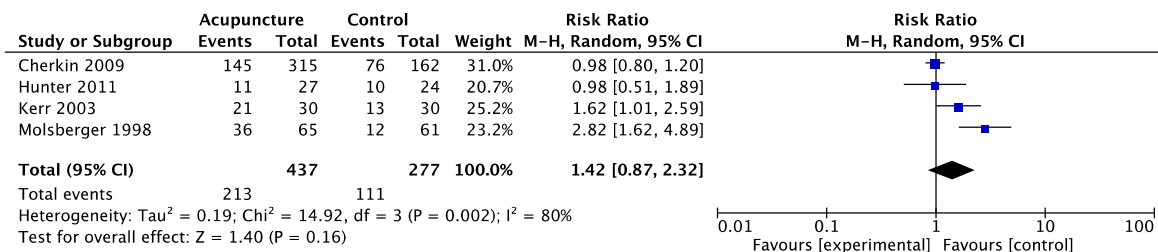

Figure 2.6: Acupuncture versus control; Subgroup analysis: Proportion of patients with a meaningful response to treatment, analyzed by study funding source (public or industry funding)

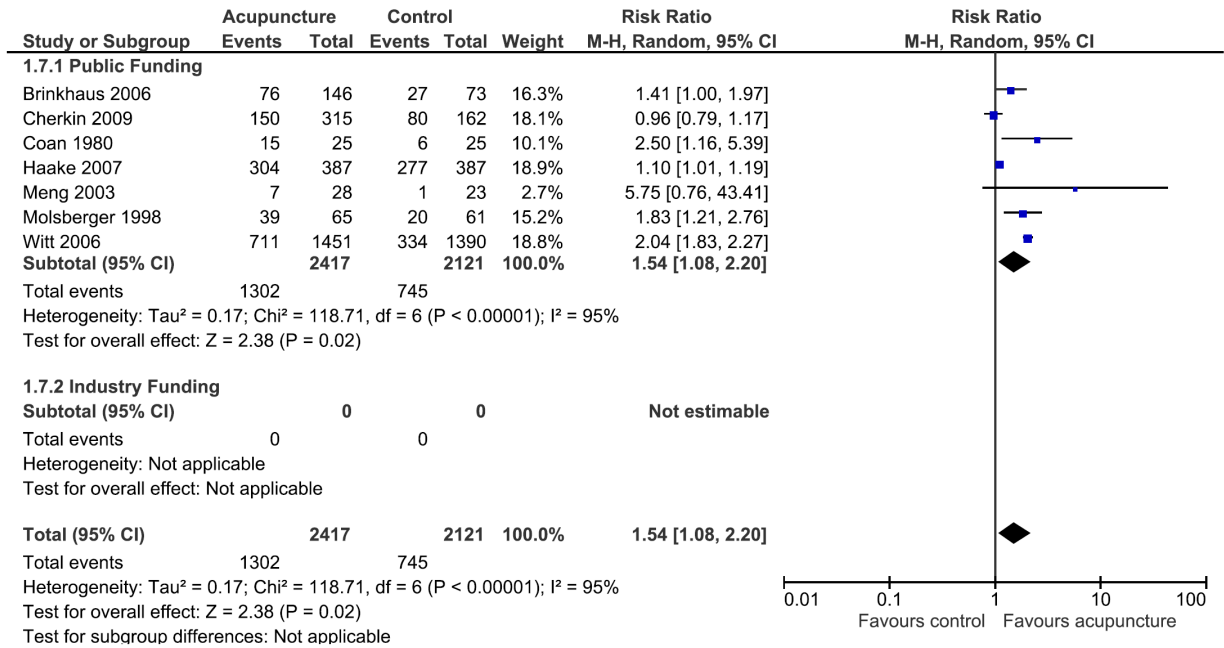

Figure 2.7: Acupuncture versus control; Subgroup analysis: Proportion of patients with a meaningful response to treatment, analyzed by median risk of bias (less than the median risk of bias score or greater than or equal to the median risk of bias score)

For each study, the risk of bias domain was scored (0=low risk, 1=unclear risk, 2=high risk) and a median was found among all the studies within each intervention. Studies were then divided into two categories: less than the median or greater than or equal to the median. (Higgins 2011)

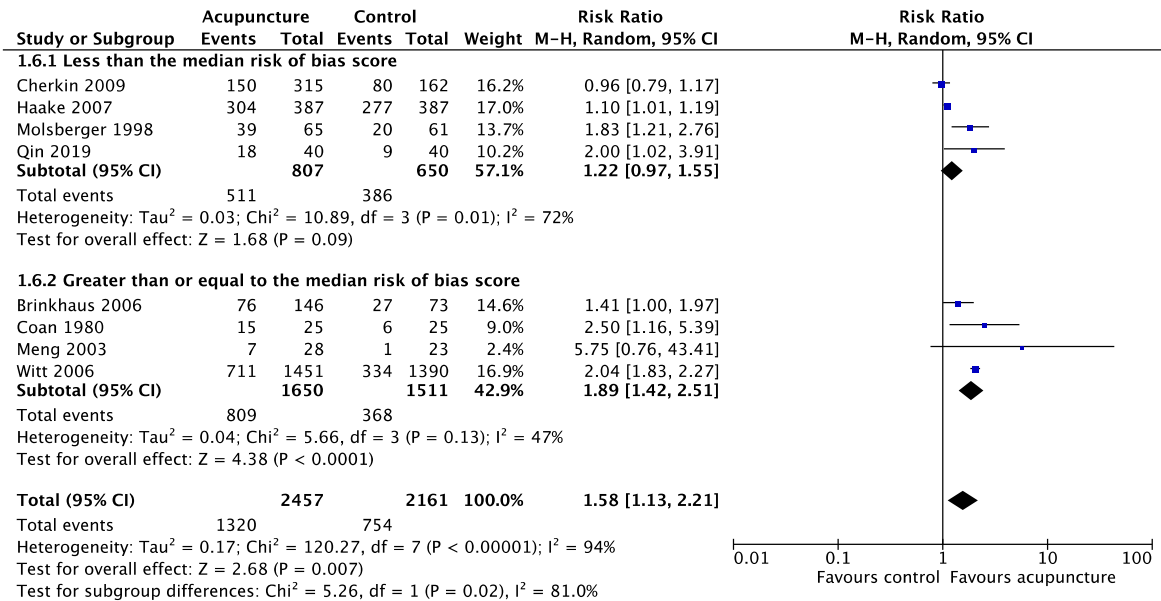

## Spinal Manipulation

Figure 3.1: Spinal Manipulation versus control; Outcome: Proportion of patients with a meaningful response to treatment

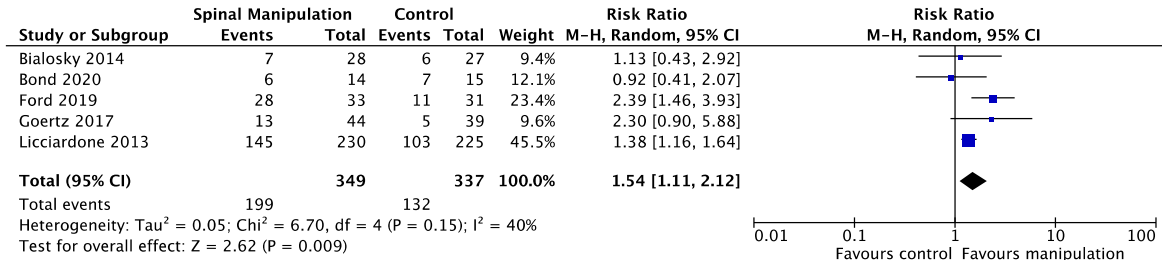

Figure 3.2: Spinal Manipulation versus control; Outcome: Proportion of patients with a meaningful response to treatment at 4 weeks or less. (Post hoc analysis)

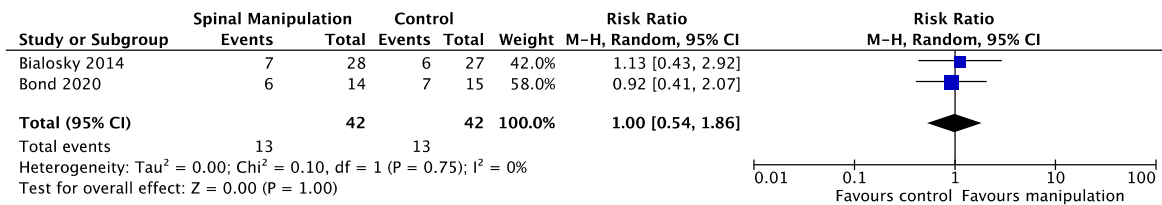

Figure 3.3: Spinal Manipulation versus control; Outcome: Proportion of patients with a meaningful response to treatment at greater than 4 weeks and less than 12 weeks. (Post hoc analysis)

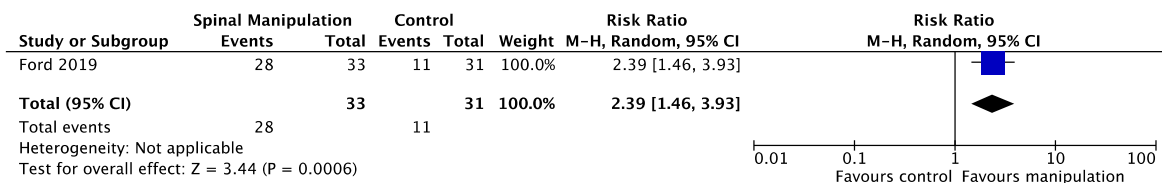

Figure 3.4: Spinal Manipulation versus control; Outcome: Proportion of patients with a meaningful response to treatment at 12 weeks or greater. (Post hoc analysis)

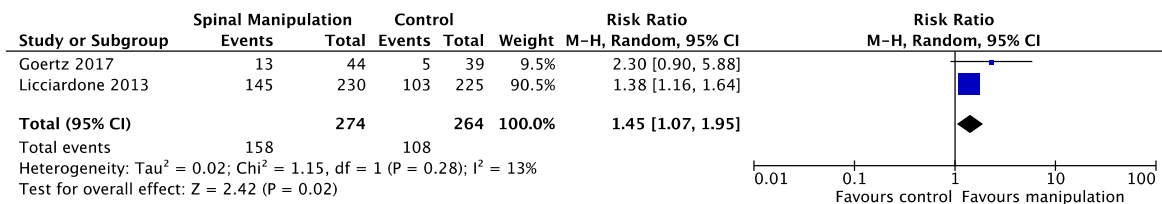

Figure 3.5: Spinal Manipulation versus control; Outcome: Proportion of patients with a meaningful response at longest follow up time.

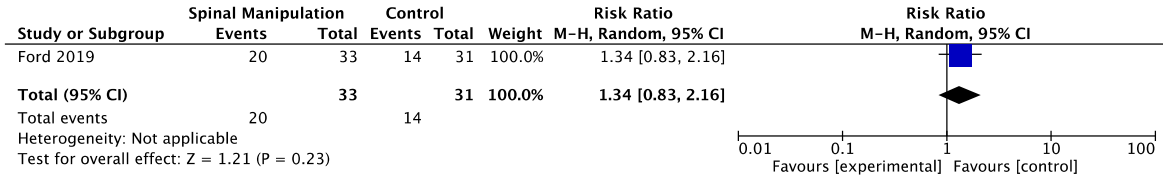

Figure 3.6: Spinal Manipulation versus control; Subgroup analysis: Proportion of patients with a meaningful response to treatment, analyzed by study funding source (public or industry funding) (Post hoc analysis)

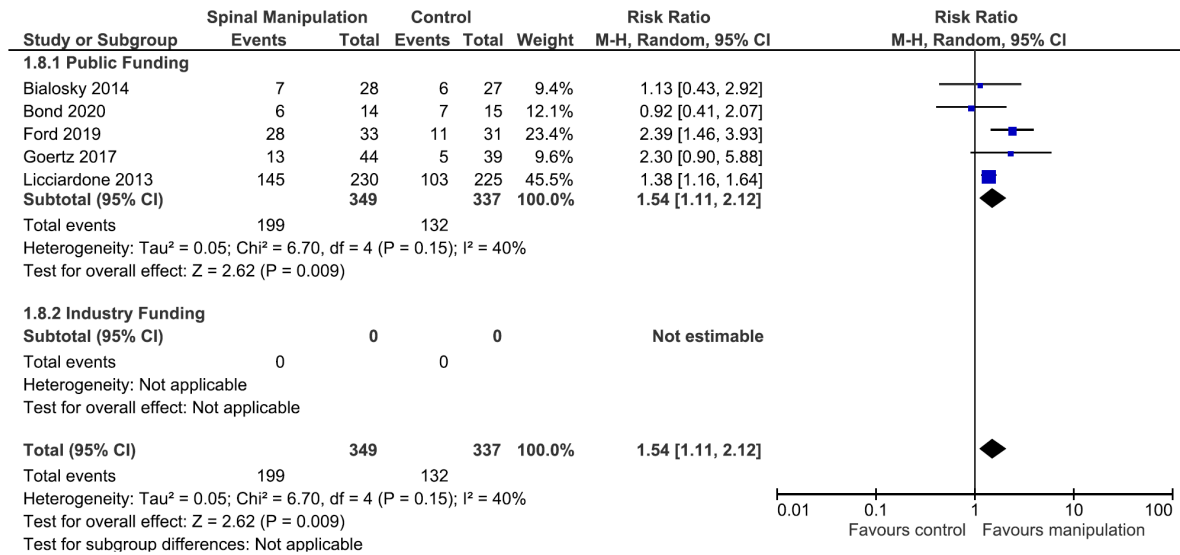

Figure 3.7: Spinal Manipulation versus control; Subgroup analysis: Proportion of patients with a meaningful response to treatment, analyzed by median risk of bias (less than the median risk of bias score or greater than or equal to the median risk of bias score) (post hoc analysis)

For each study, the risk of bias domain was scored (0=low risk, 1=unclear risk, 2=high risk) and a median was found among all the studies within each intervention. Studies were then divided into two categories: less than the median or greater than or equal to the median. (Higgins 2011)

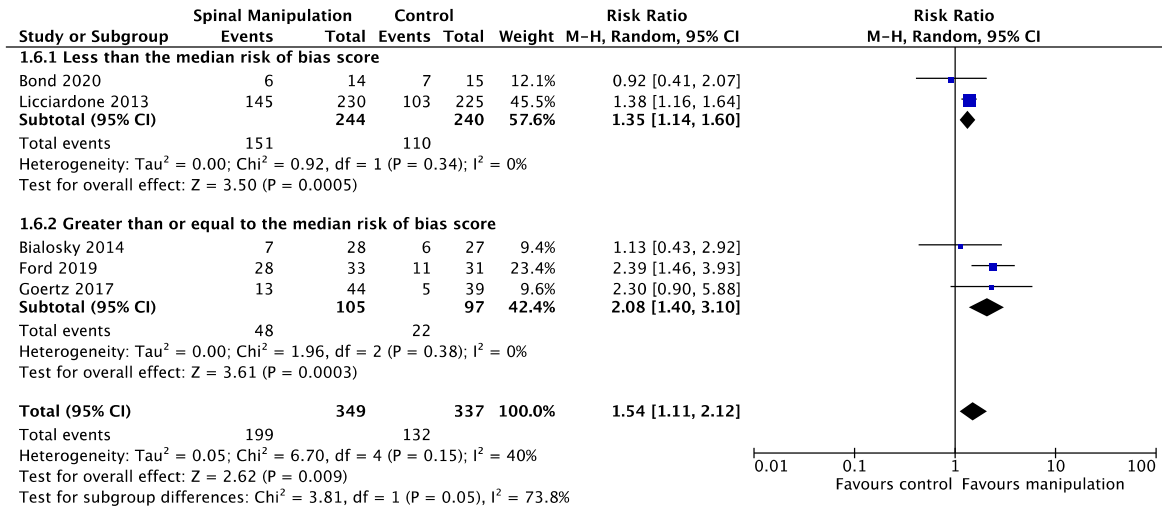

## Oral NSAIDs

Figure 4.1: Oral NSAIDs versus placebo; Outcome: Proportion of patients with a meaningful response to treatment.

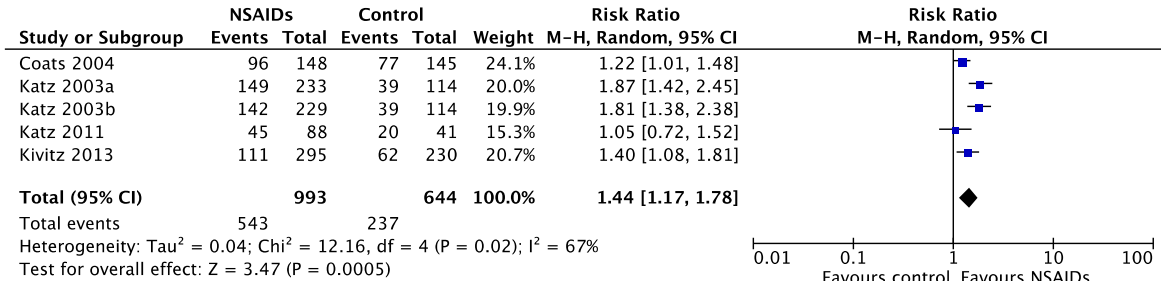

Figure 4.2: Oral NSAIDs versus placebo; Outcome: Proportion of patients with a meaningful response to treatment at 4 weeks or less. (Post hoc analysis)

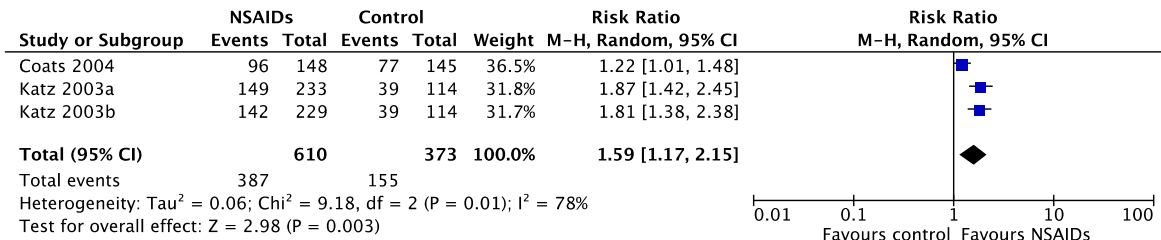

Figure 4.3: Oral NSAIDs versus placebo; Outcome: Proportion of patients with a meaningful response to treatment at greater than 4 weeks and less than 12 weeks. (Post hoc analysis)

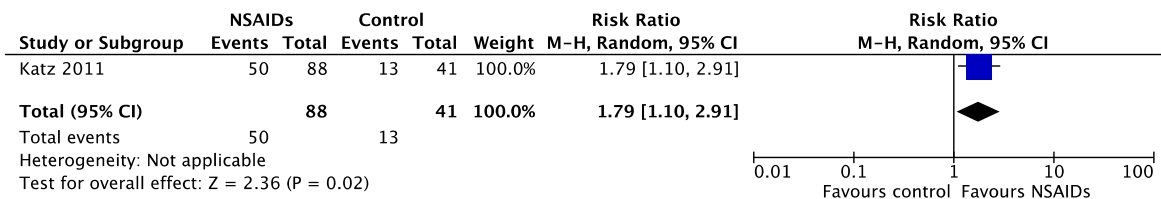

Figure 4.4: Oral NSAIDs versus placebo; Outcome: Proportion of patients with a meaningful response to treatment at 12 weeks or greater. (Post hoc analysis)

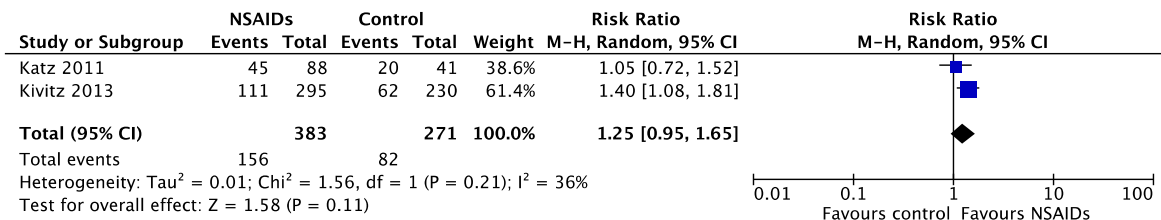

Figure 4.5: Oral NSAIDs versus placebo; Subgroup analysis: Proportion of patients with a meaningful response to treatment, analyzed by study funding source (public or industry funding) (Post hoc analysis)

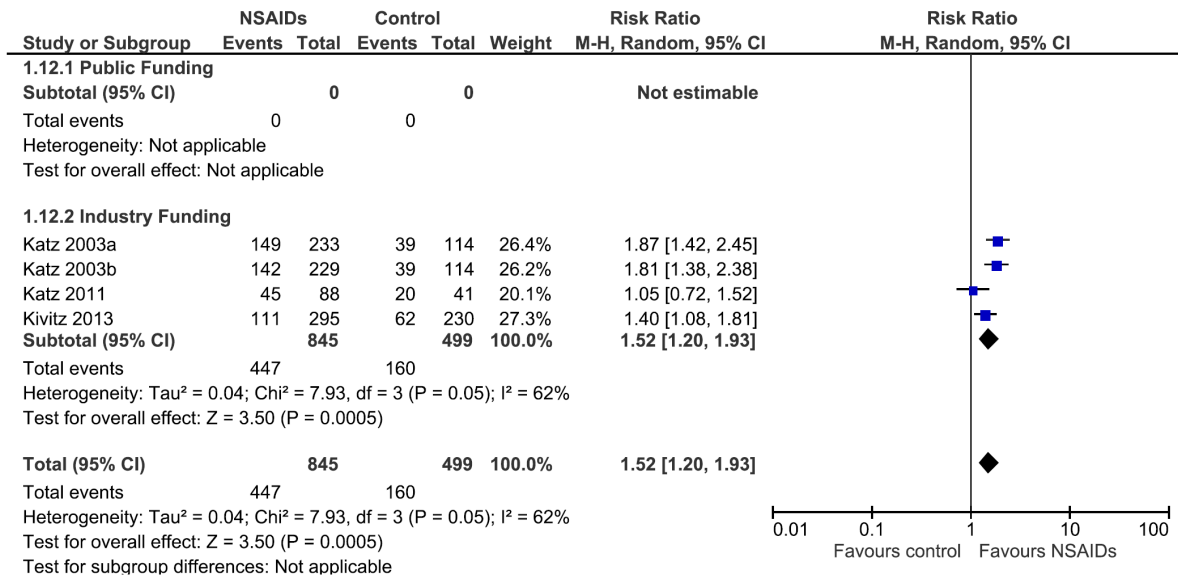

Figure 4.6: Oral NSAIDs versus placebo; Subgroup analysis: Proportion of patients with a meaningful response to treatment, analyzed by median risk of bias (less than the median risk of bias score or greater than or equal to the median risk of bias score) (post hoc analysis)

For each study, the risk of bias domain was scored (0=low risk, 1=unclear risk, 2=high risk) and a median was found among all the studies within each intervention. Studies were then divided into two categories: less than the median or greater than or equal to the median. (Higgins 2011)

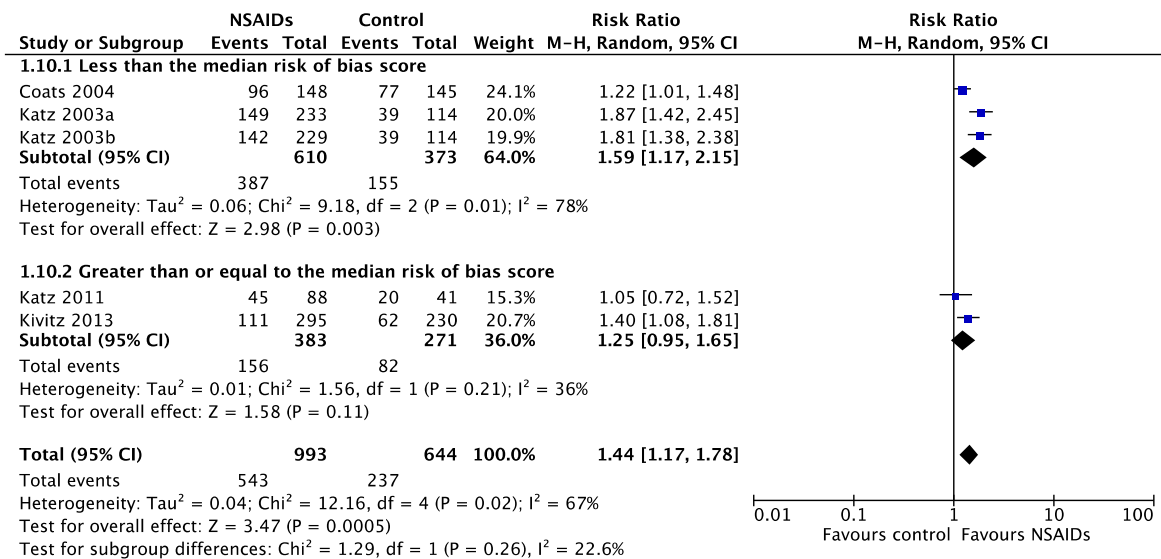



## Rubefaciants

Figure 5.1: Rubefaciants versus placebo; Outcome: Proportion of patients with a meaningful response to treatment.

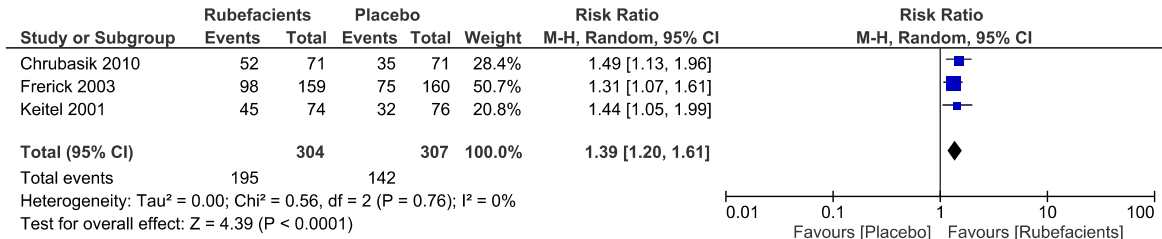

Figure 5.2: Rubefaciants versus placebo; Outcome: Proportion of patients with a meaningful response to treatment at 4 weeks or less. (Post hoc analysis)

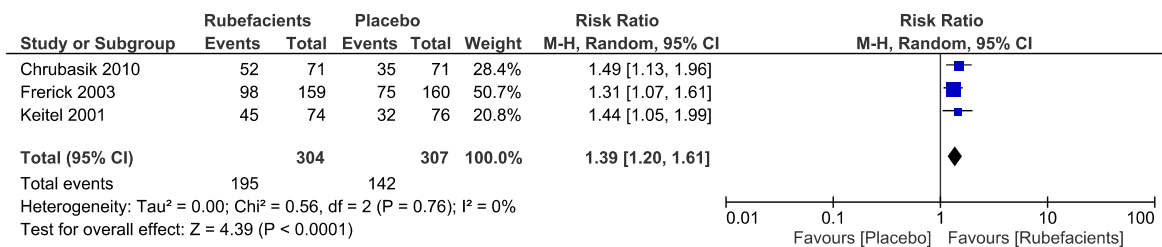

Figure 5.3: Rubefaciants versus placebo; Subgroup analysis: Proportion of patients with a meaningful response to treatment, analyzed by study funding source (public or industry funding) (Post hoc analysis)

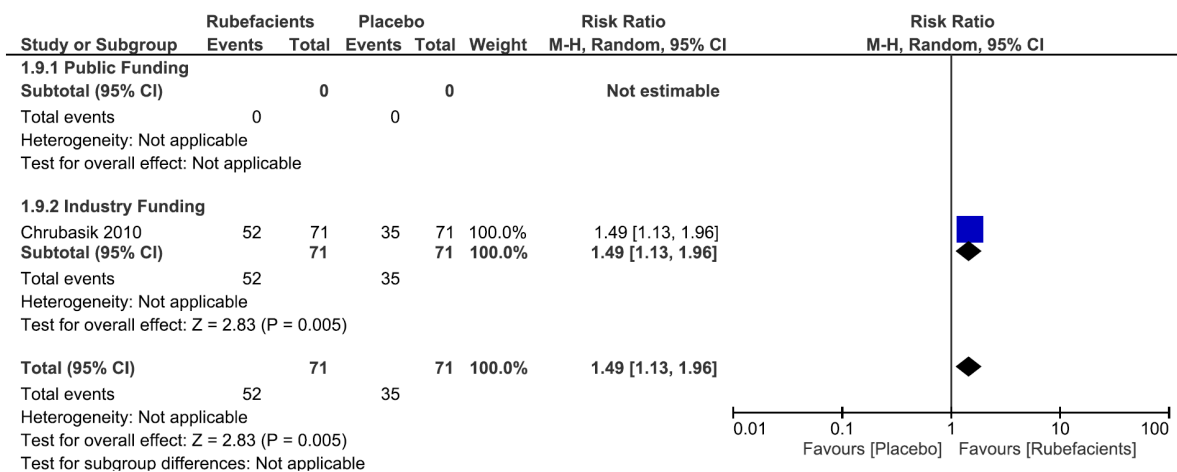

Figure 5.4: Rubefacients versus placebo; Subgroup analysis: Proportion of patients with a meaningful response to treatment, analyzed by median risk of bias (less than the median risk of bias score or greater than or equal to the median risk of bias score) (post hoc analysis)  
 For each study, the risk of bias domain was scored (0=low risk, 1=unclear risk, 2=high risk) and a median was found among all the studies within each intervention. Studies were then divided into two categories: less than the median or greater than or equal to the median. (Higgins 2011)

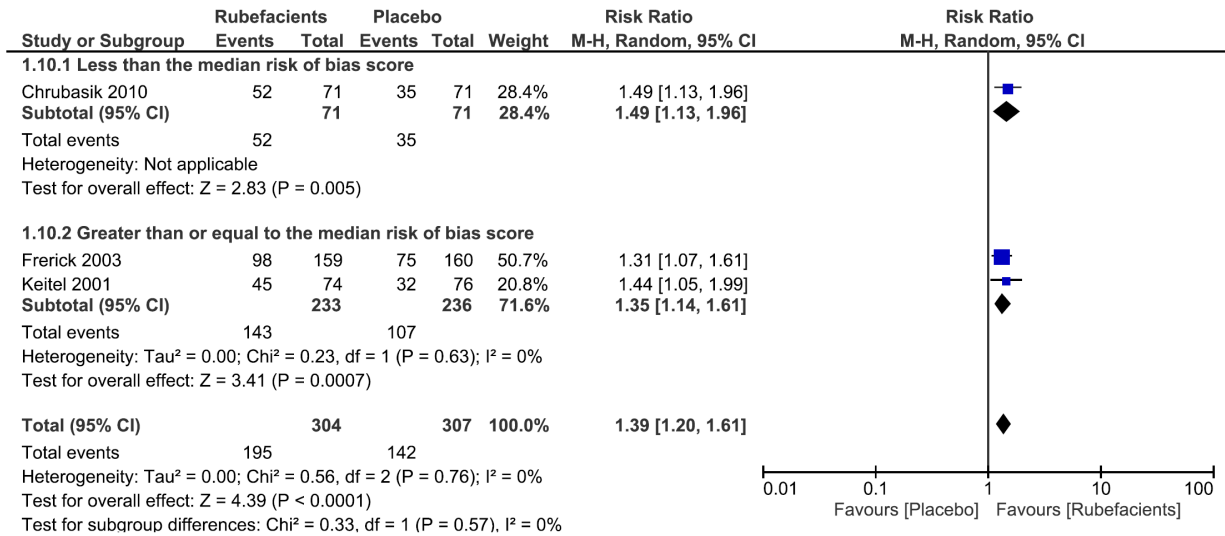

## Opioids

Figure 6.1: Opioids versus placebo; Outcome: Proportion of patients with a meaningful response to treatment.

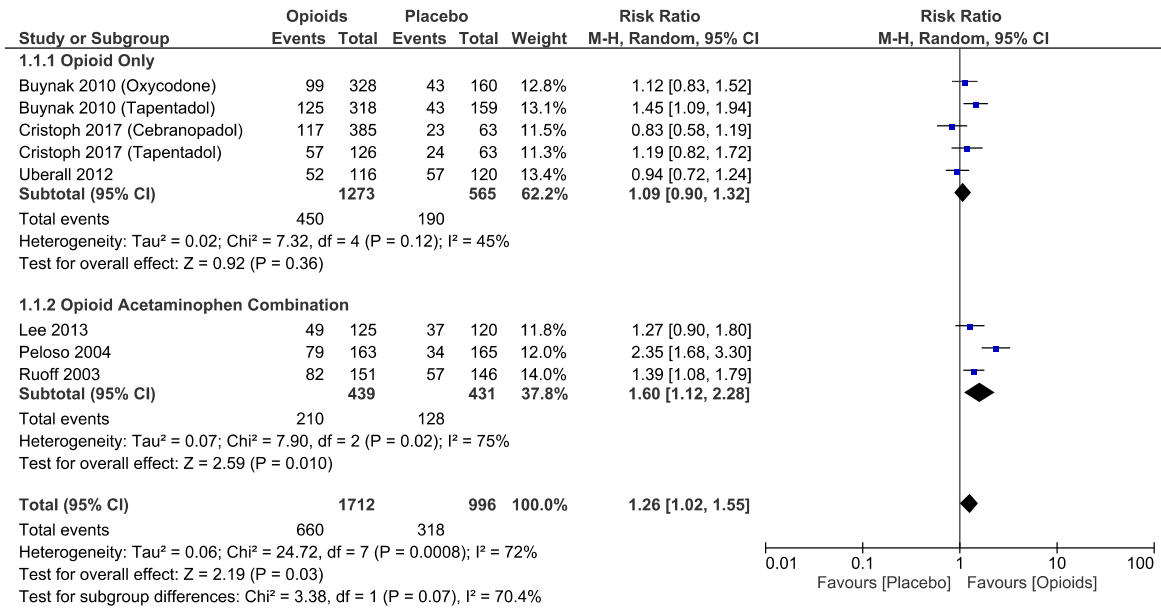

Figure 6.2: Opioids versus placebo; Outcome: Proportion of patients with a meaningful response to treatment at 4 weeks or less. (Post hoc analysis)

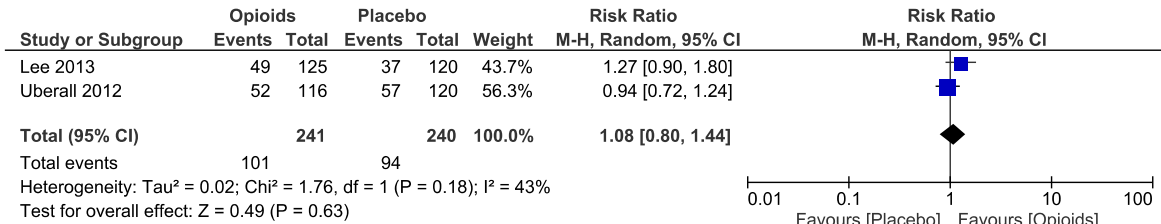

Figure 6.3: Opioids versus placebo; Outcome: Outcome: Proportion of patients with a meaningful response to treatment at 12 weeks or greater. (Post hoc analysis)

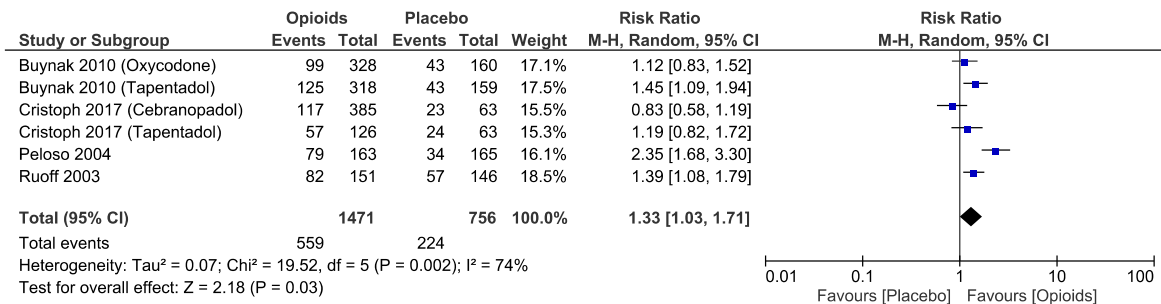

Figure 6.4: Opioids versus placebo; Subgroup analysis: Proportion of patients with a meaningful response to treatment, analyzed by study funding source (public or industry funding) (Post hoc analysis)

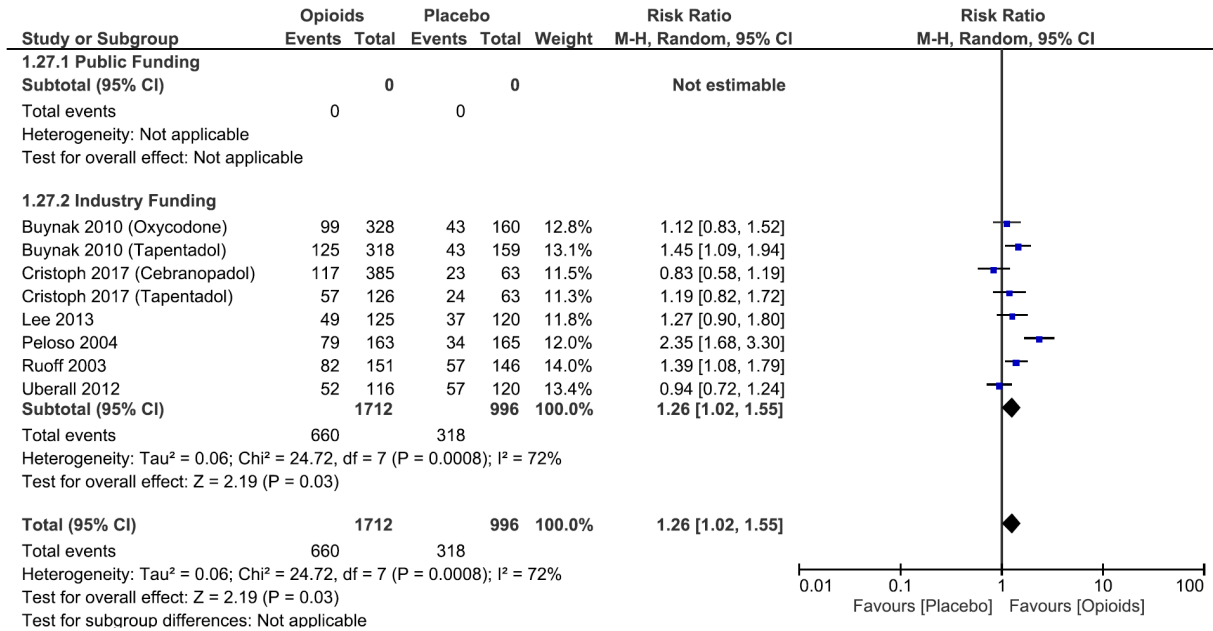

Figure 6.5: Opioids versus placebo; Subgroup analysis: Proportion of patients with a meaningful response to treatment, analyzed by median risk of bias (less than the median risk of bias score or greater than or equal to the median risk of bias score) (post hoc analysis)

For each study, the risk of bias domain was scored (0=low risk, 1=unclear risk, 2=high risk) and a median was found among all the studies within each intervention. Studies were then divided into two categories: less than the median or greater than or equal to the median. (Higgins 2011)

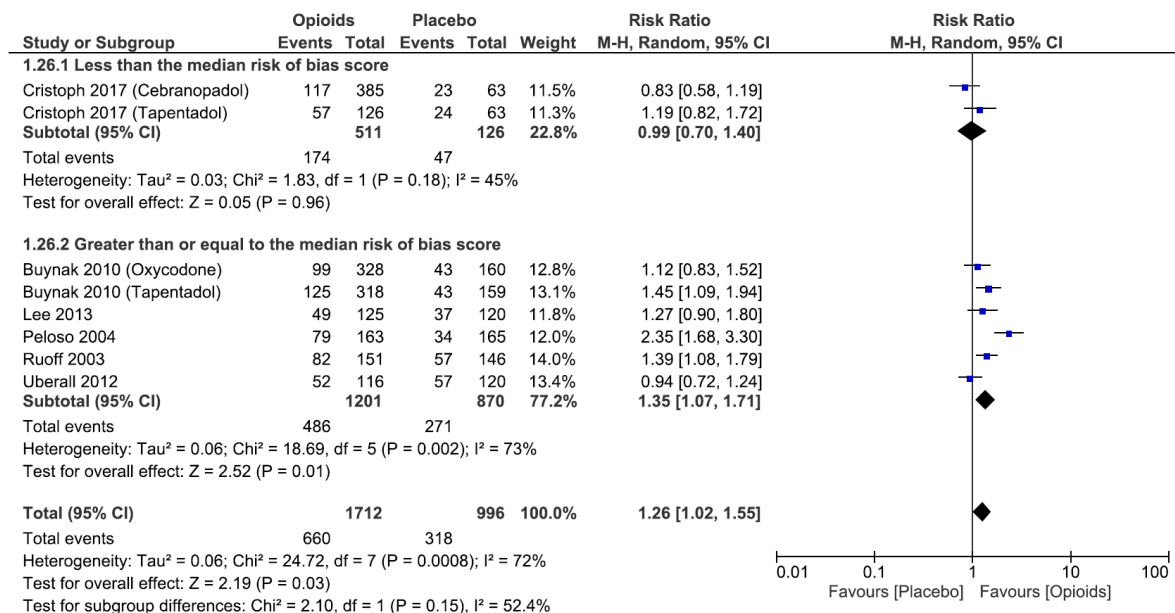

## SNRIs

Figure 7.1: SNRIs (duloxetine) versus placebo; Outcome: Proportion of patients with a meaningful response to treatment.

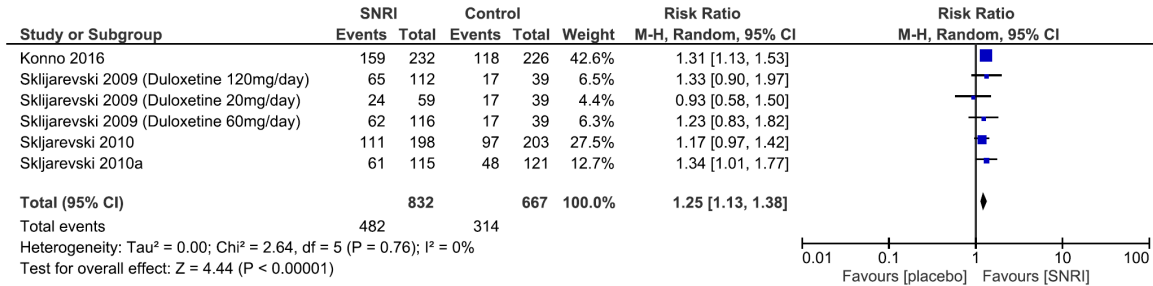

Figure 7.2: SNRIs (duloxetine) versus placebo; Outcome: Proportion of patients with a meaningful response to treatment at 12 weeks or greater. (Post hoc analysis)

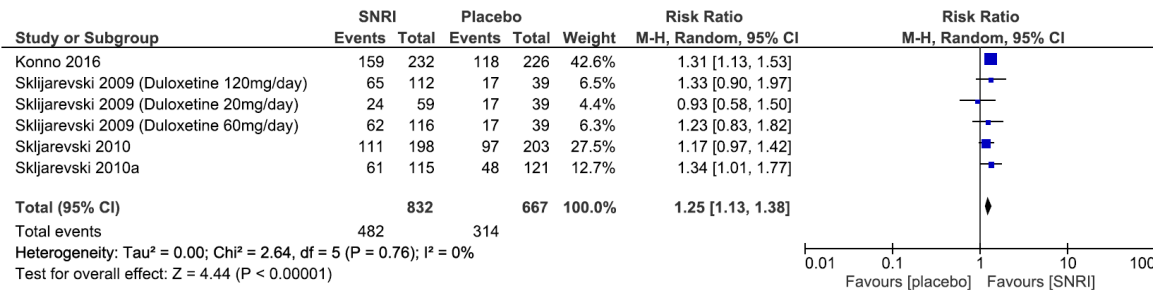

Figure 7.3: SNRIs (duloxetine) versus placebo; Subgroup analysis: Proportion of patients with a meaningful response to treatment, analyzed by study funding source (public or industry funding) (Post hoc analysis)

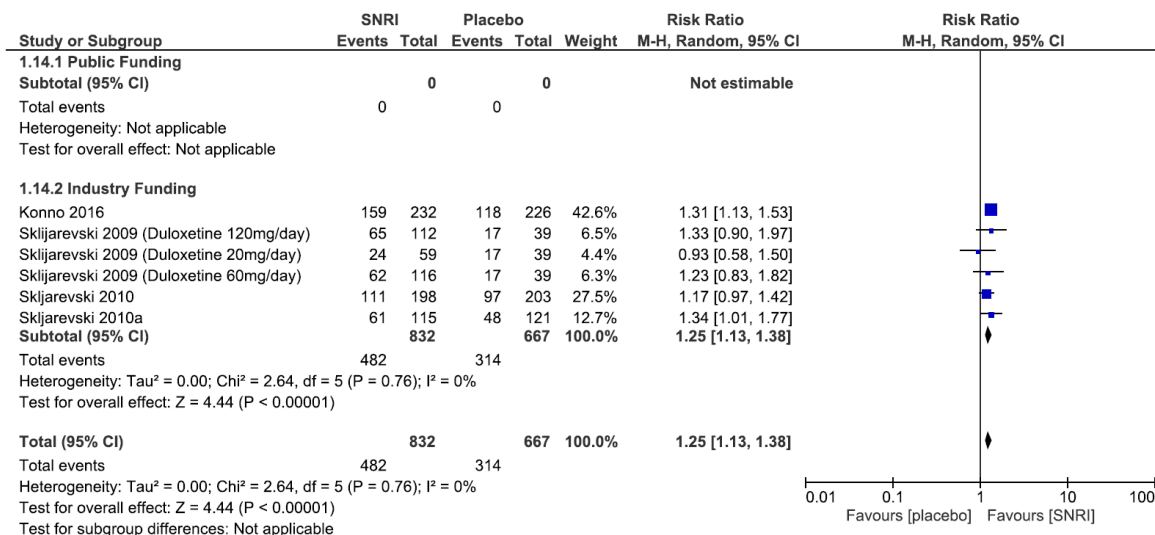

Figure 7.4: SNRIs (duloxetine) versus placebo; Subgroup analysis: Proportion of patients with a meaningful response to treatment, analyzed by median risk of bias (less than the median risk of bias score or greater than or equal to the median risk of bias score) (post hoc analysis)  
 For each study, the risk of bias domain was scored (0=low risk, 1=unclear risk, 2=high risk) and a median was found among all the studies within each intervention. Studies were then divided into two categories: less than the median or greater than or equal to the median. (Higgins 2011)

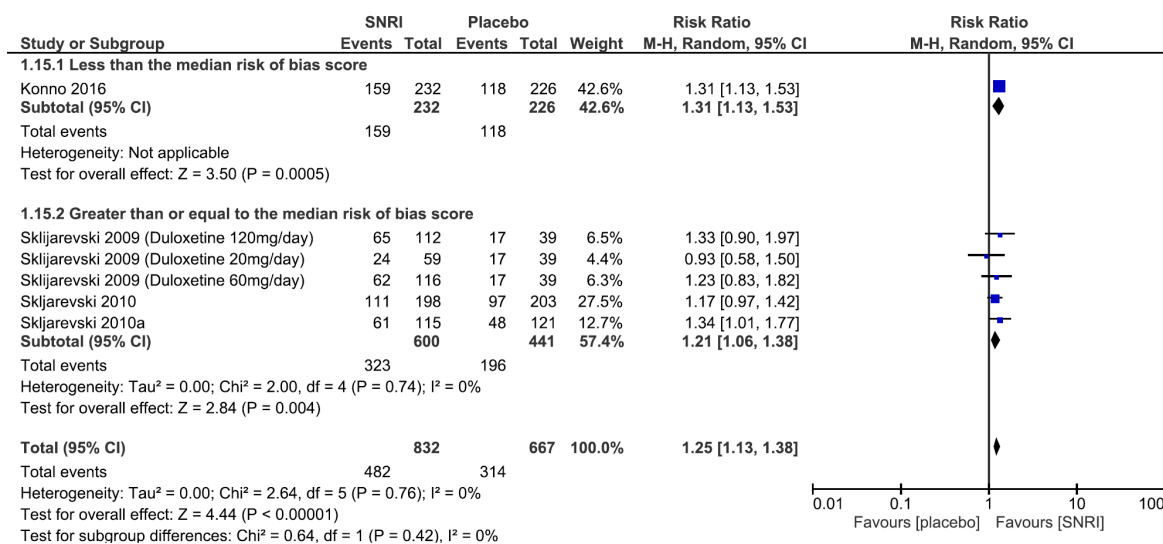

## Corticosteroid Injections

Figure 8.1: Corticosteroid injections versus saline injections; Outcome: Proportion of patients with a meaningful response to treatment.

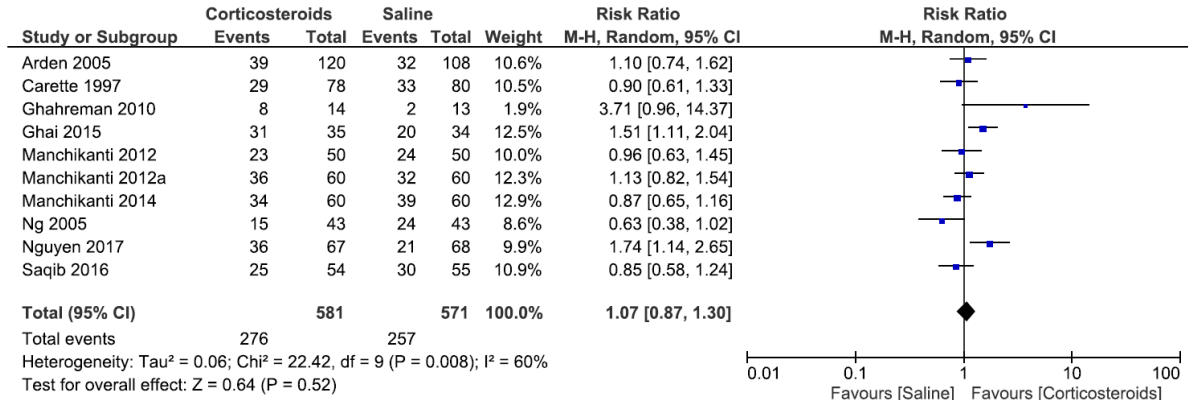

Figure 8.2: Corticosteroid injections versus saline injections; Outcome: Proportion of patients with a meaningful response to treatment at 4 weeks or less

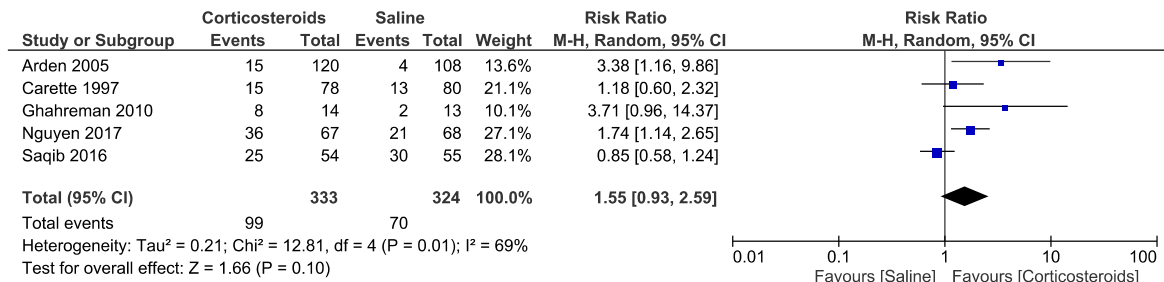

Figure 8.3: Corticosteroid injections versus saline injections; Outcome: Outcome: Proportion of patients with a meaningful response to treatment at 12 weeks or greater.

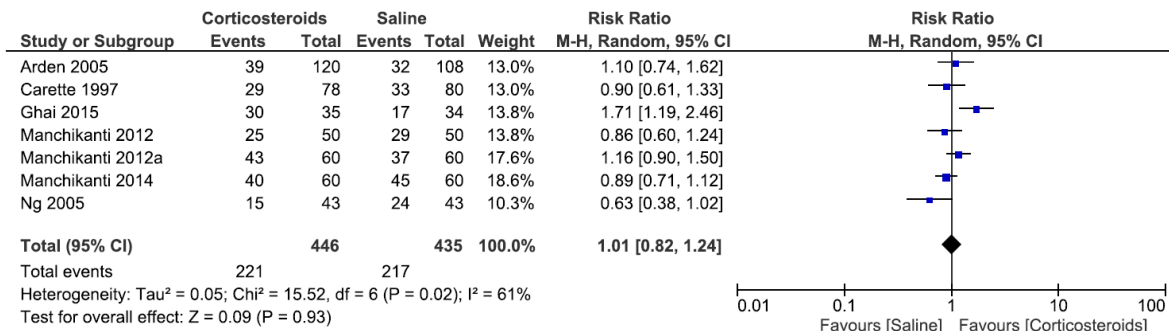

Figure 8.4: Corticosteroid injections versus saline injections; Subgroup analysis: Proportion of patients with a meaningful response to treatment, analyzed by study funding source (public or industry funding)

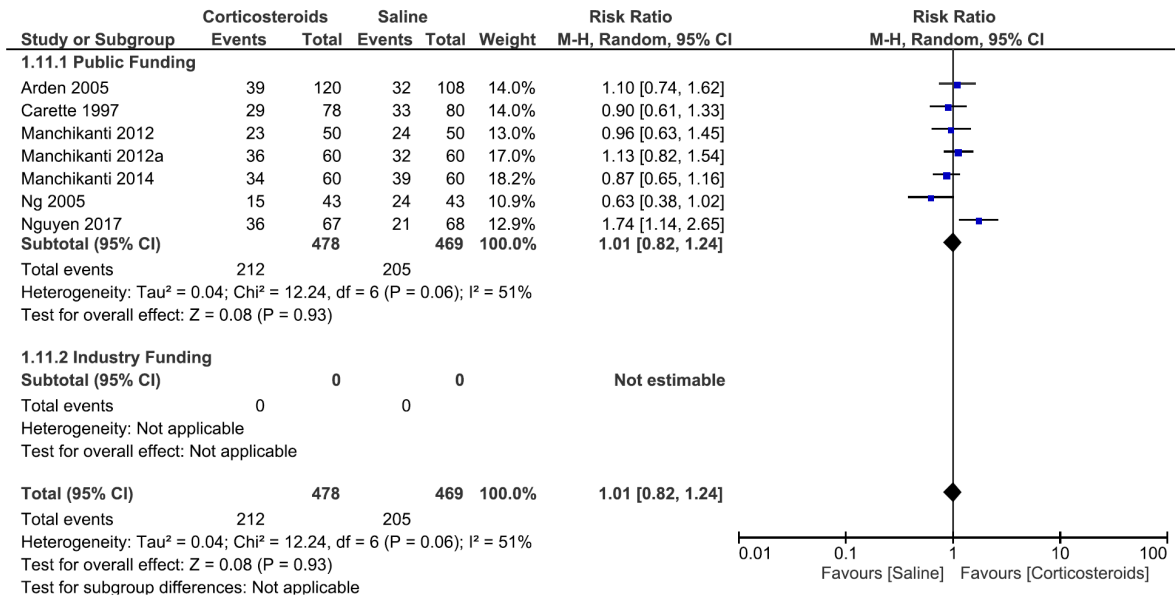

Figure 8.5: Corticosteroid injections versus saline injections; Subgroup analysis: Proportion of patients with a meaningful response to treatment, analyzed by median risk of bias (less than the median risk of bias score or greater than or equal to the median risk of bias score)  
 For each study, the risk of bias domain was scored (0=low risk, 1=unclear risk, 2=high risk) and a median was found among all the studies within each intervention. Studies were then divided into two categories: less than the median or greater than or equal to the median. (Higgins 2011)

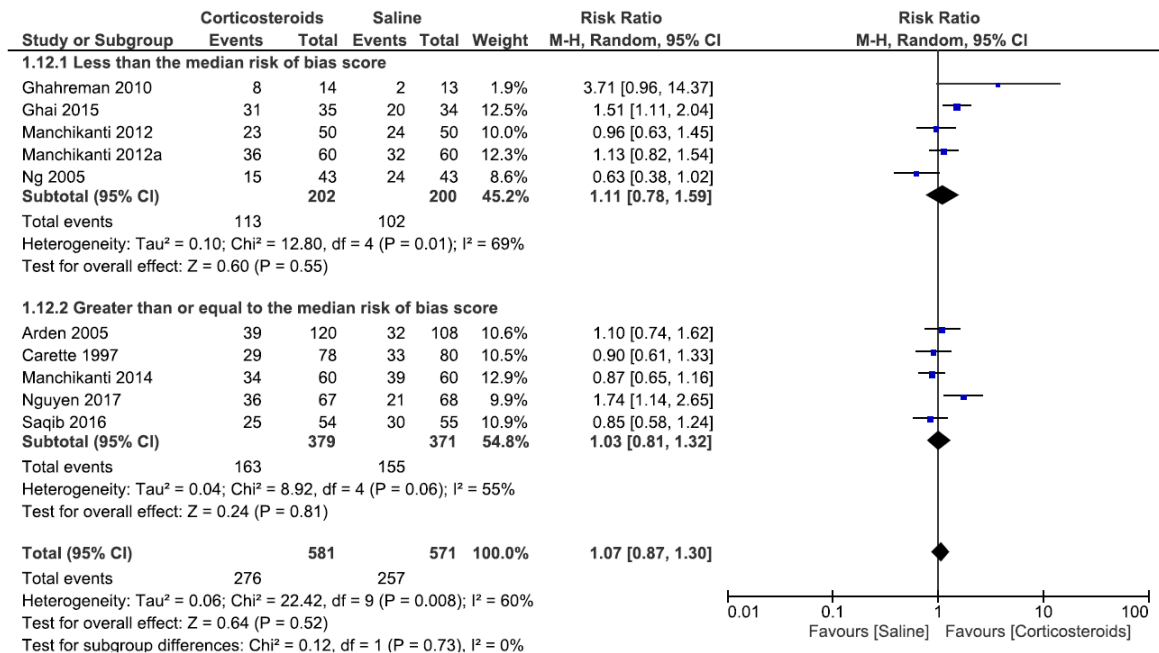



## Post Hoc Analysis

### I. Fixed Effects Analysis

Figure 9.1: Exercise versus no exercise; Outcome: Proportion of patients with a meaningful response to treatment (fixed effects analysis)

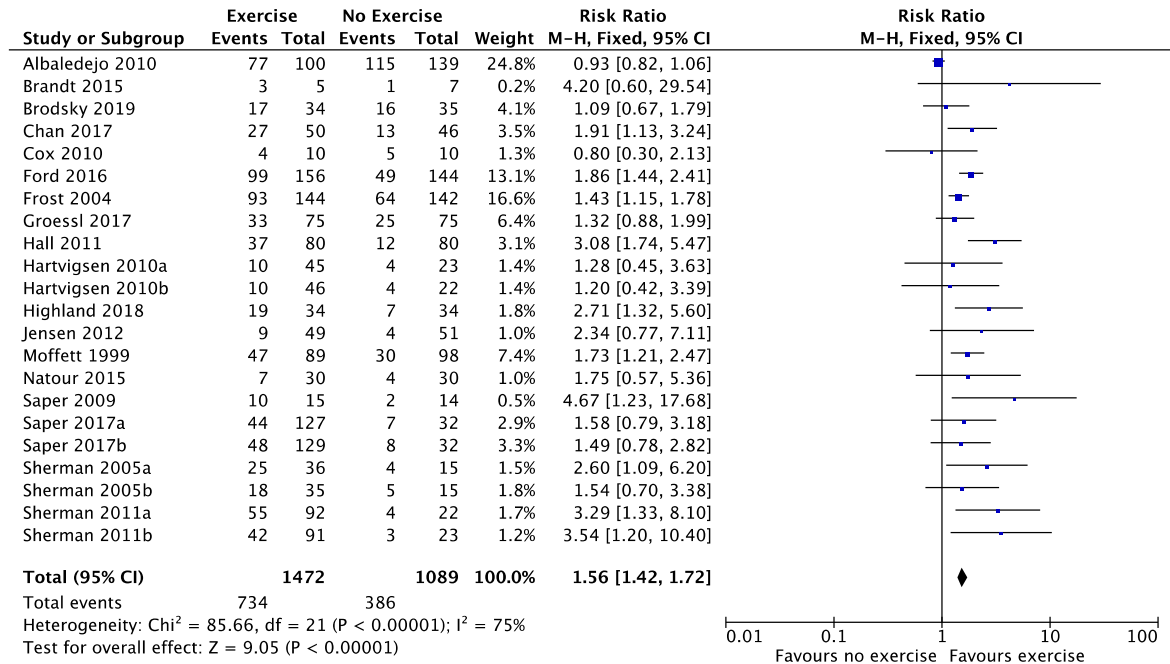

Figure 9.2: Acupuncture versus control; Outcome: Proportion of patients with a meaningful response to treatment (fixed effects analysis)

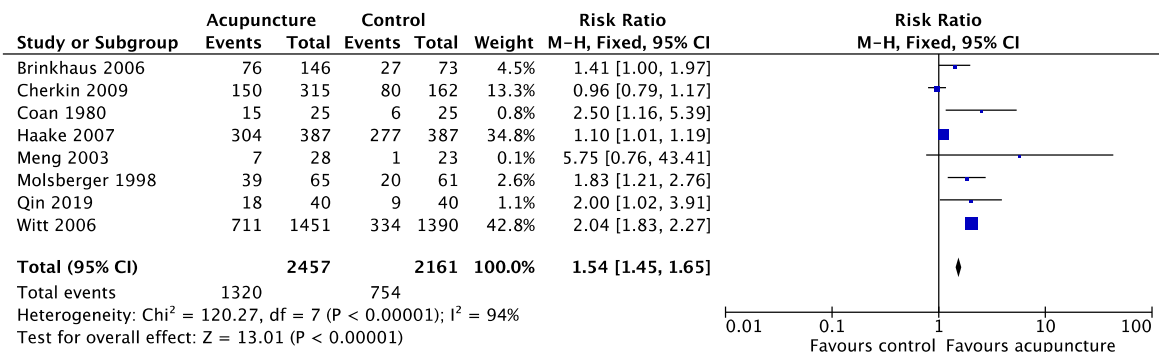

Figure 9.3: Spinal Manipulation versus control; Outcome: Proportion of patients with a meaningful response to treatment Oral NSAIDs (fixed effects analysis)

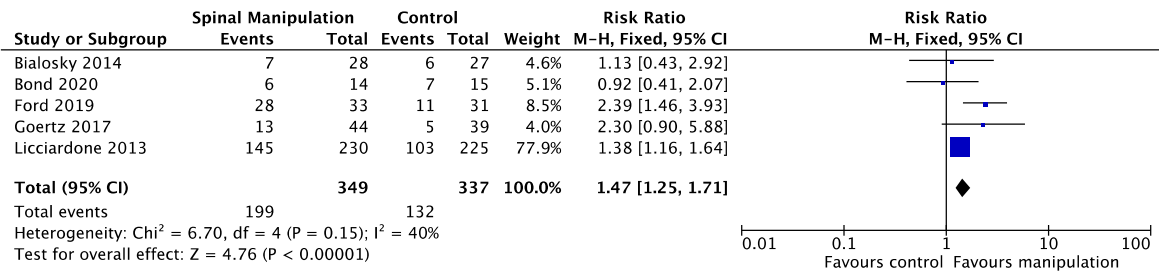

Figure 9.4: Oral NSAIDs versus placebo; Outcome: Proportion of patients with a meaningful response to treatment (fixed effects analysis)

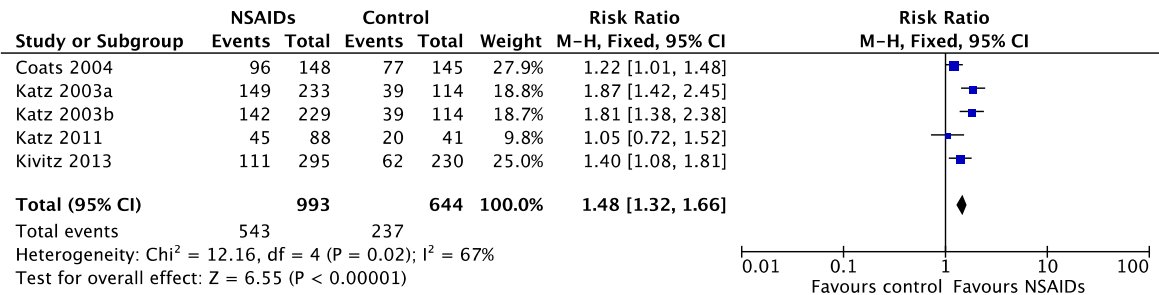

Figure 9.5: Rubefacients versus placebo; Outcome: Proportion of patients with a meaningful response to treatment (fixed effects analysis)

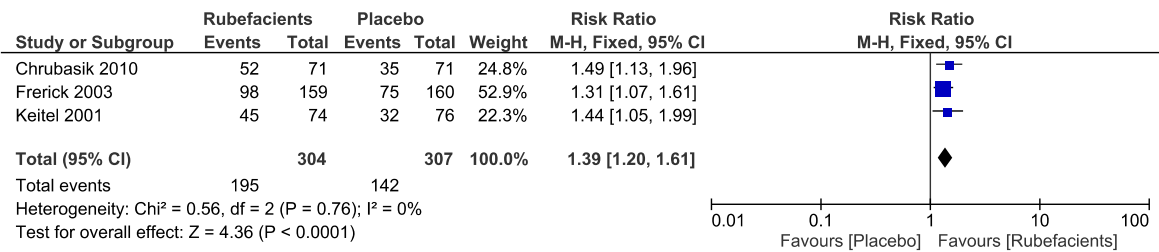

Figure 9.6: Opioids versus placebo; Outcome: Proportion of patients with a meaningful response to treatment (fixed effects analysis)

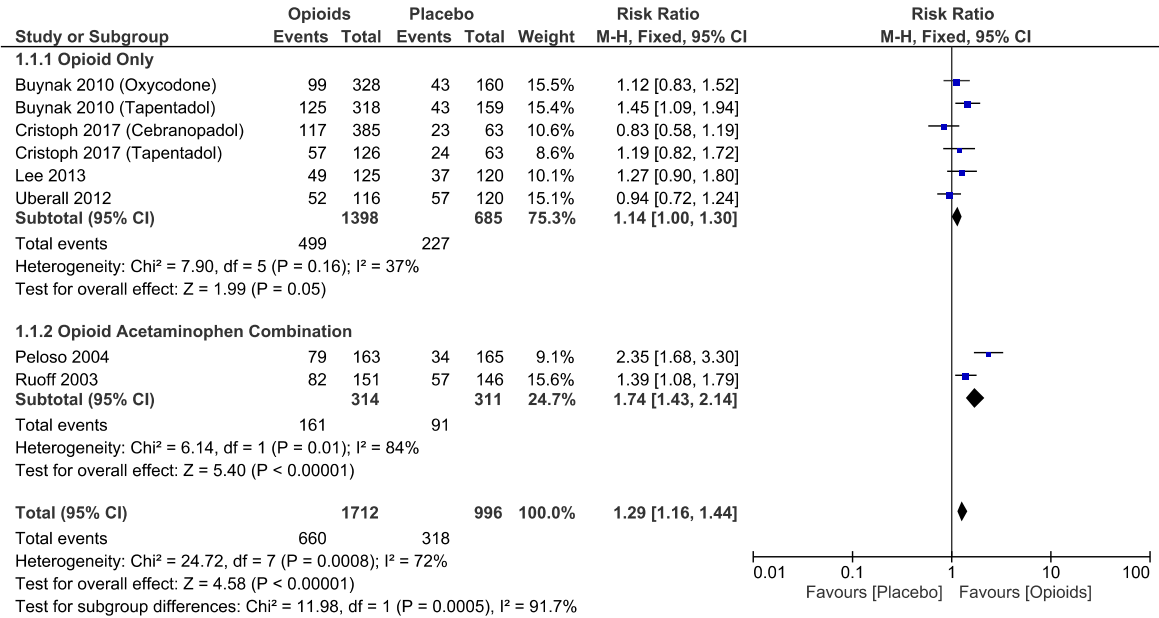

Figure 9.7: SNRIs (duloxetine) versus placebo; Outcome: Proportion of patients with a meaningful response to treatment (fixed effects analysis)

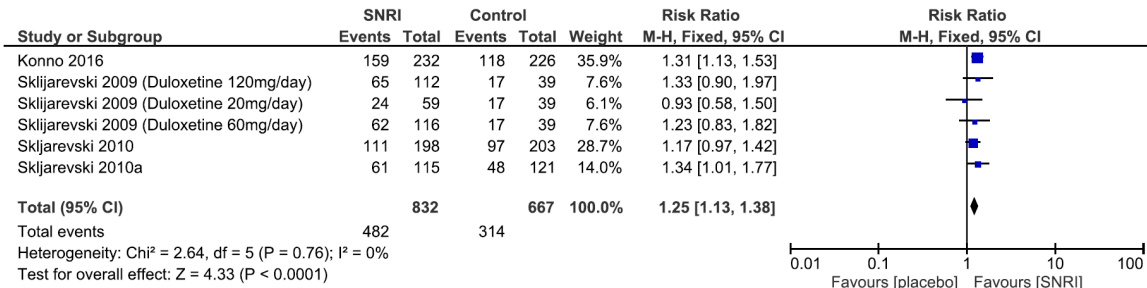

Figure 9.8: Corticosteroid injections versus saline injections; Outcome: Proportion of patients with a meaningful response to treatment (fixed effects analysis)

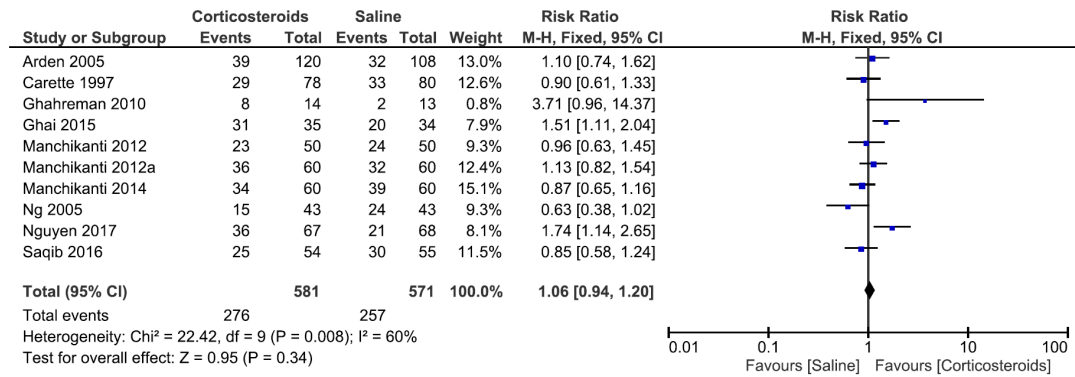

## II. Subgroup analysis by control group characteristics (sham versus non-sham procedures or prescribed versus passive exercise controls)

Figures 10.1: Exercise versus no exercise; Subgroup analysis: Proportion of patients with a meaningful response to treatment, analyzed by control group characteristics (prescribed versus passive exercise controls)

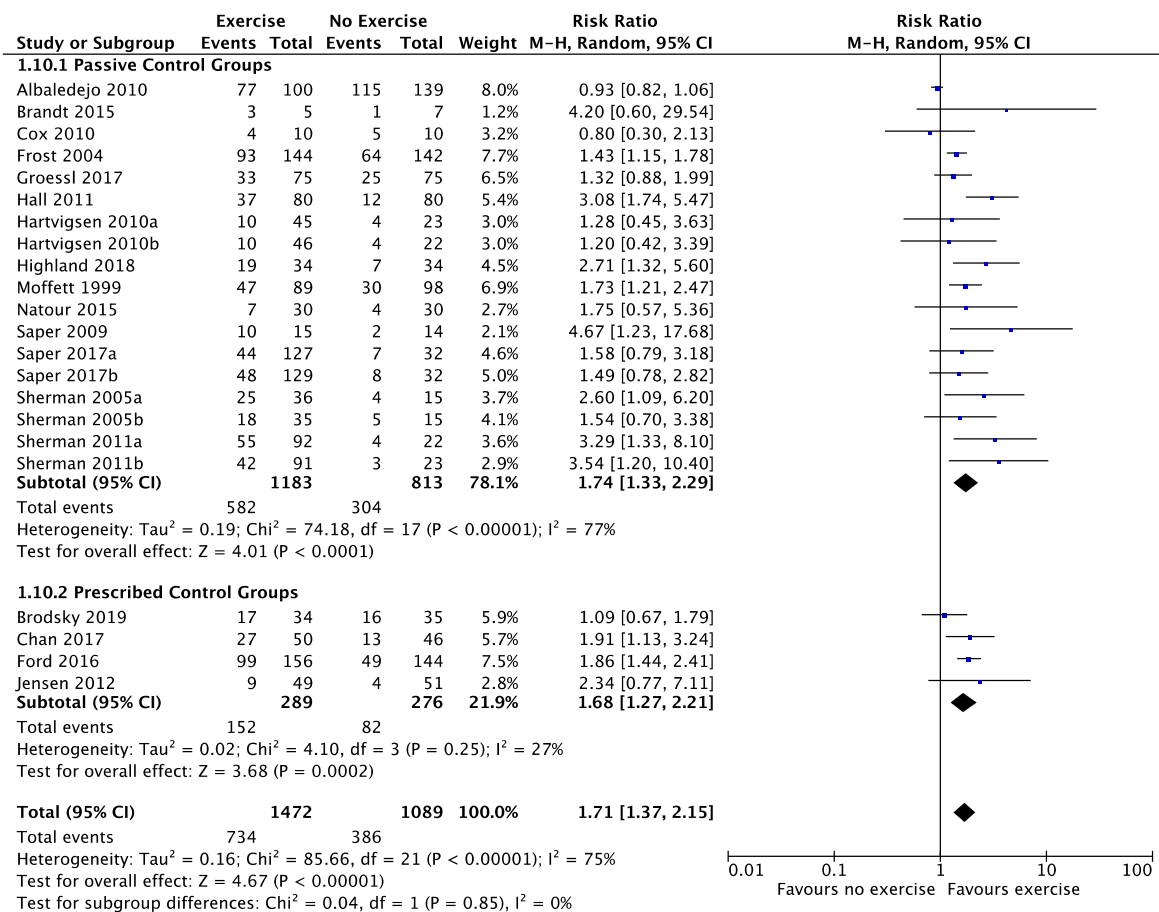

Figure 10.2: Acupuncture versus control; Subgroup analysis: Proportion of patients with a meaningful response to treatment, analyzed by control group characteristics (sham versus non-sham procedures)

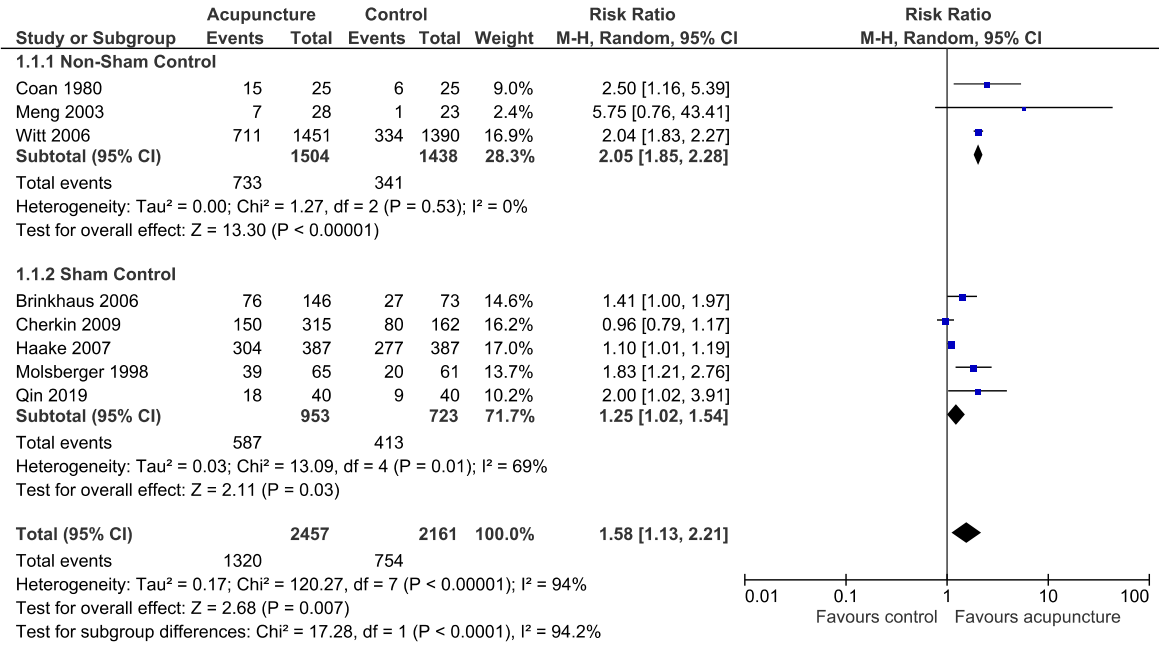

Figure 10.3: Spinal Manipulation versus control; Subgroup analysis: Proportion of patients with a meaningful response to treatment, analyzed by control group characteristics (sham versus non-sham procedures)

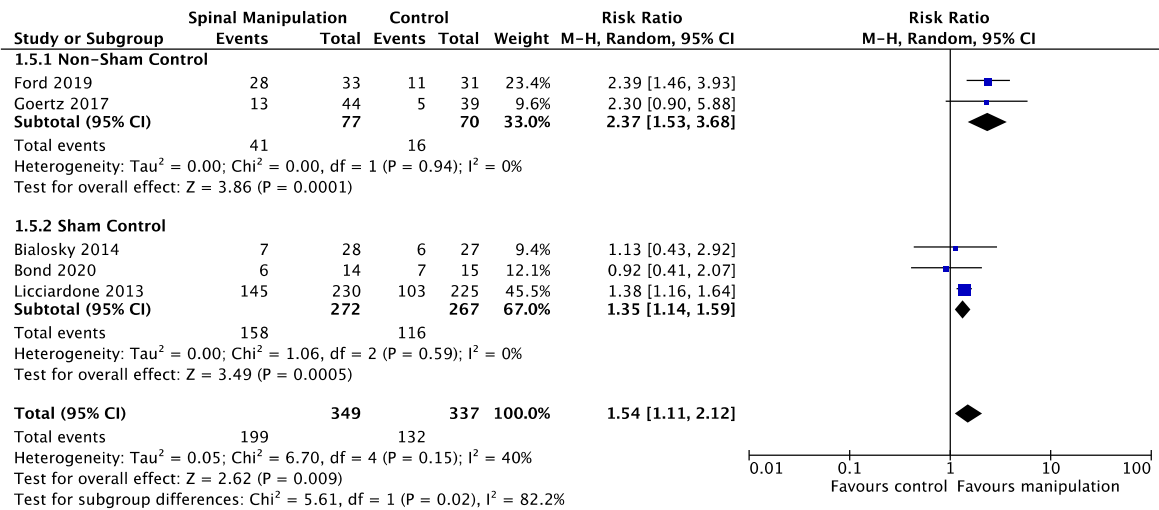

### III. Subgroup analysis by trial size

Figures 11.1: Exercise versus no exercise; Subgroup analysis: Proportion of patients with a meaningful response to treatment, analyzed by study size (<150 participants compared to ≥150 participants)

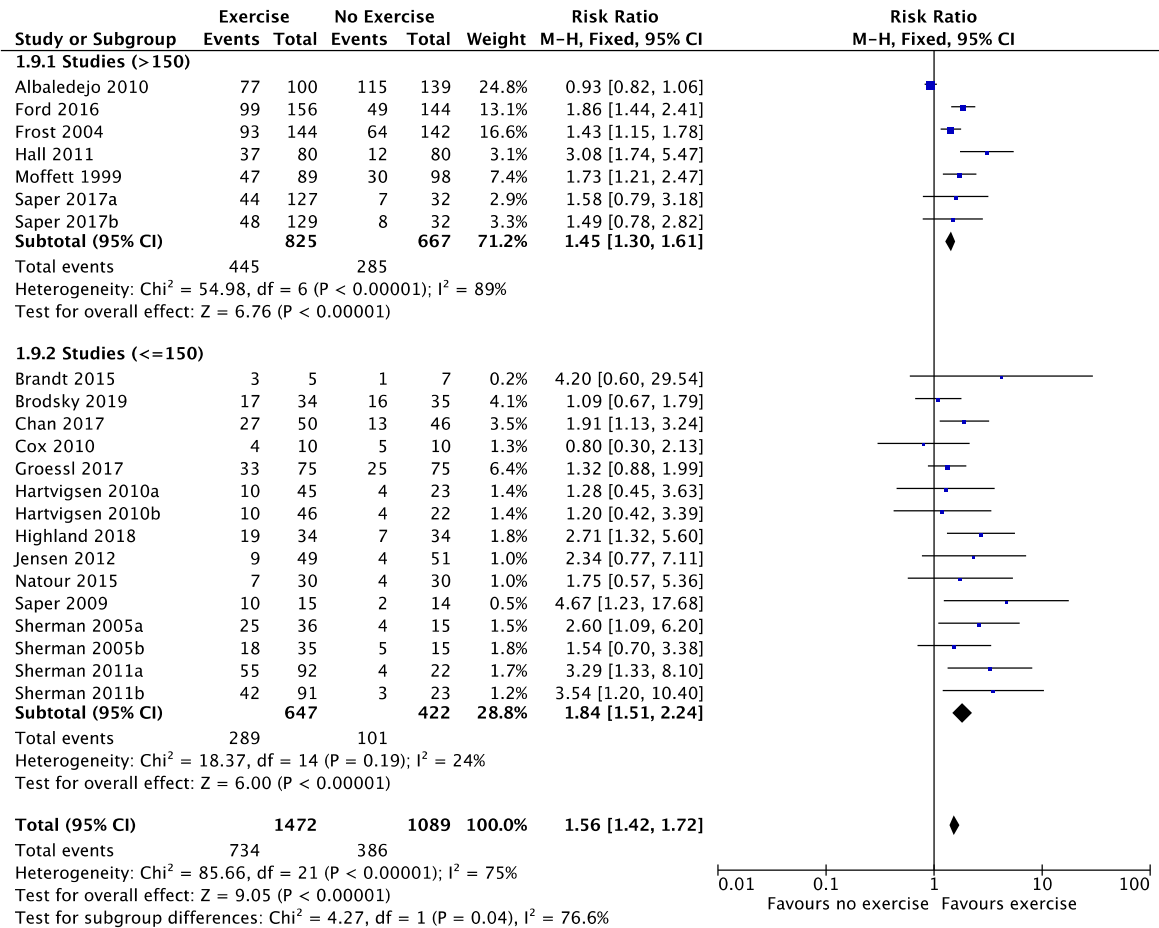

Figures 11.2: Acupuncture versus control; Subgroup analysis: Proportion of patients with a meaningful response to treatment, analyzed by study size (<150 participants compared to ≥150 participants)

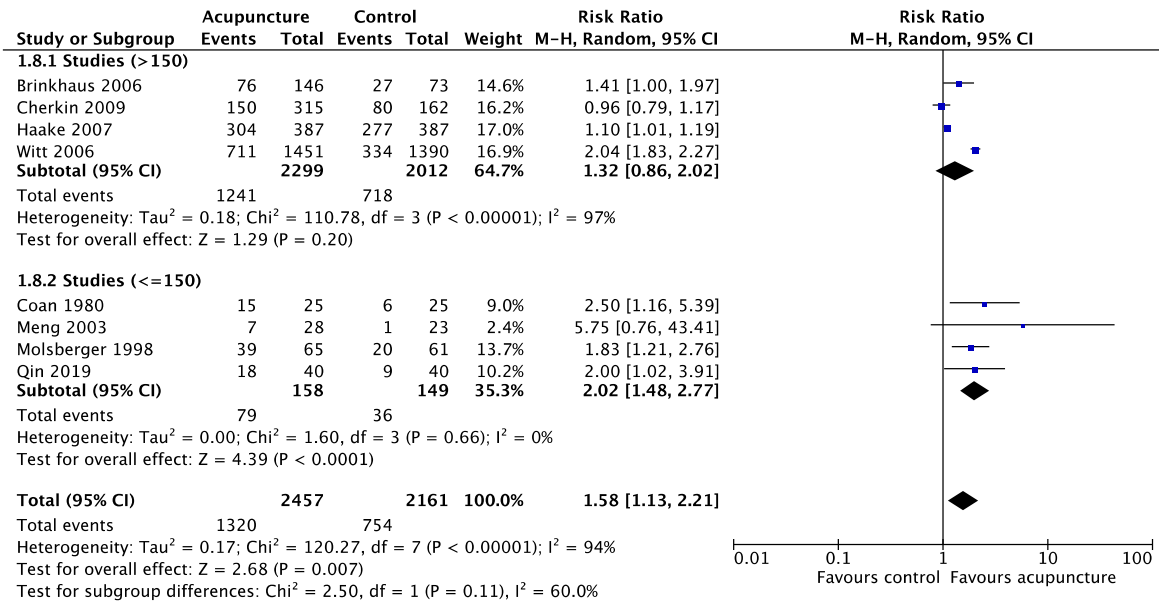

Figures 11.3: Spinal Manipulation versus control; Subgroup analysis: Proportion of patients with a meaningful response to treatment, analyzed by study size (<150 participants compared to ≥150 participants)

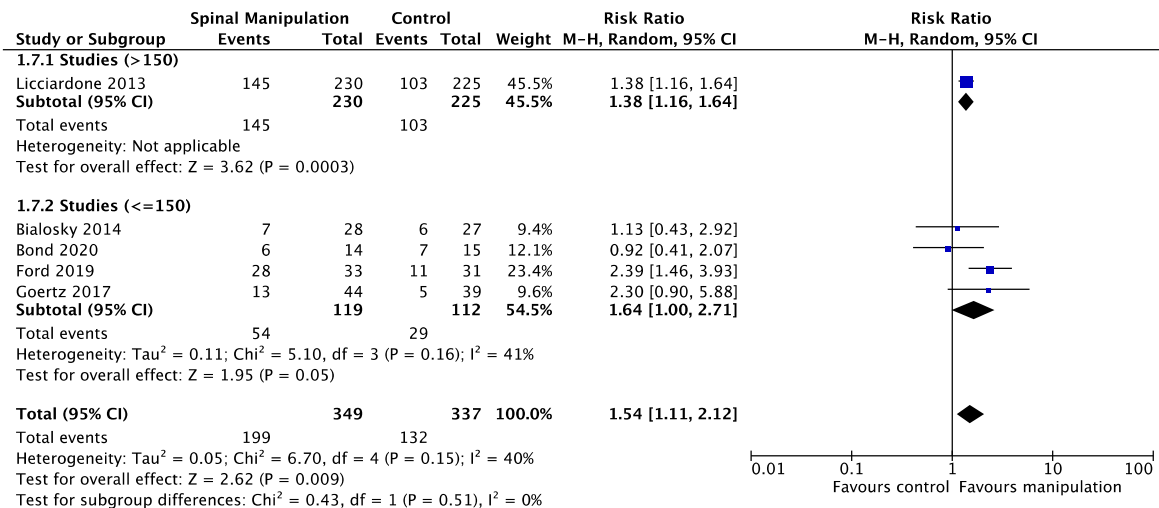



Figures 11.4: Oral NSAIDs versus placebo; Subgroup analysis: Proportion of patients with a meaningful response to treatment, analyzed by study size (<150 participants compared to ≥150 participants)

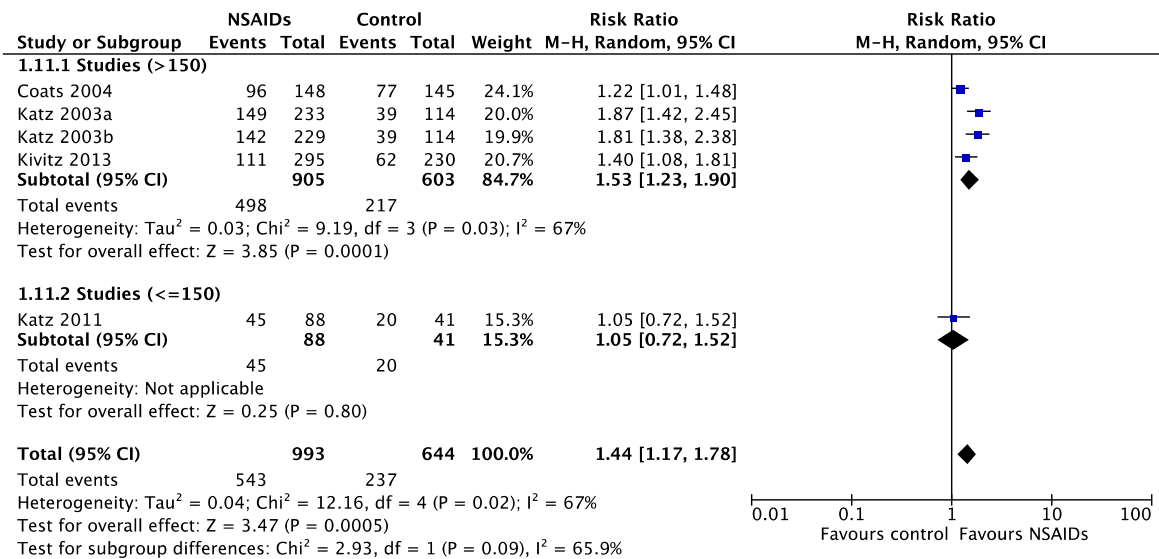

Figures 11.5: Rubefacients versus placebo; Subgroup analysis: Proportion of patients with a meaningful response to treatment, analyzed by study size (<150 participants compared to ≥150 participants)

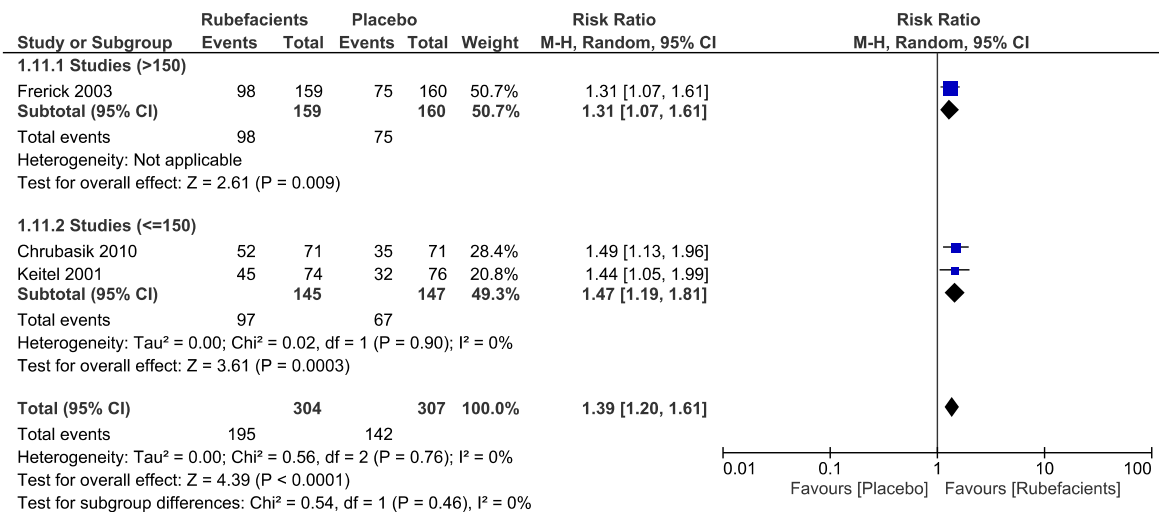

Figures 11.6: Opioids versus placebo; Subgroup analysis: Proportion of patients with a meaningful response to treatment, analyzed by study size (<150 participants compared to ≥150 participants)

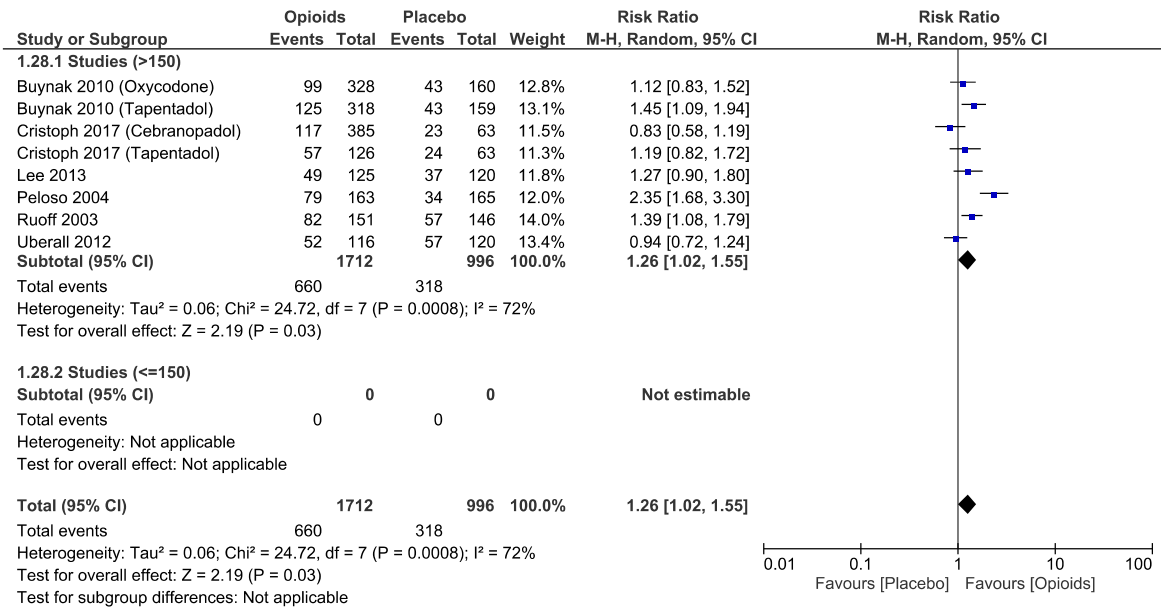

Figures 11.7: SNRI (duloxetine) versus placebo; Subgroup analysis: Proportion of patients with a meaningful response to treatment, analyzed by study size (<150 participants compared to ≥150 participants)

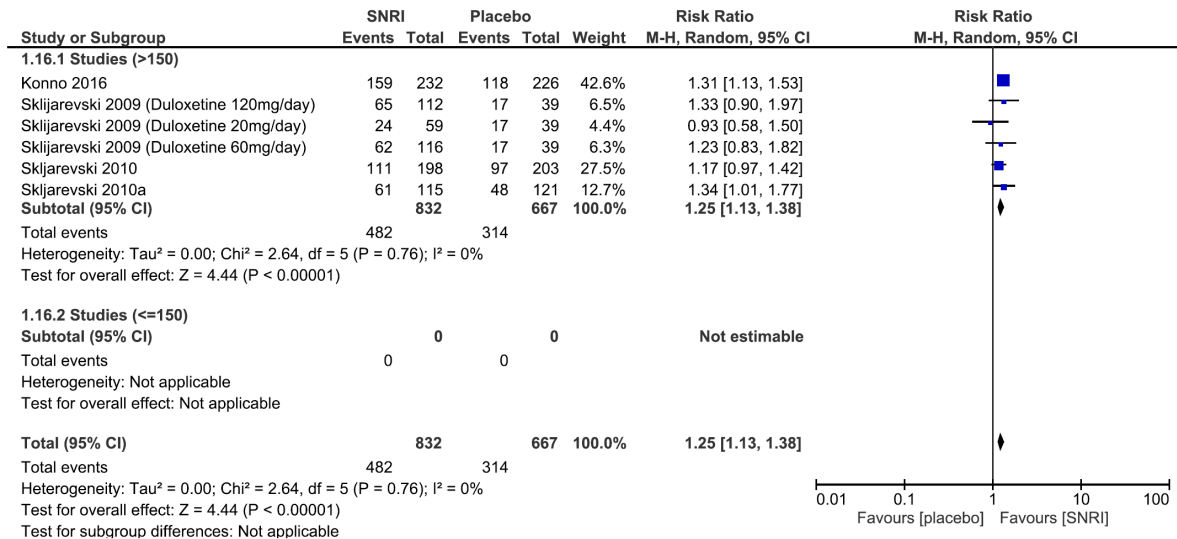

Figures 11.8: Corticosteroid Injections versus saline injections; Subgroup analysis: Proportion of patients with a meaningful response to treatment, analyzed by study size (<150 participants compared to ≥150 participants)

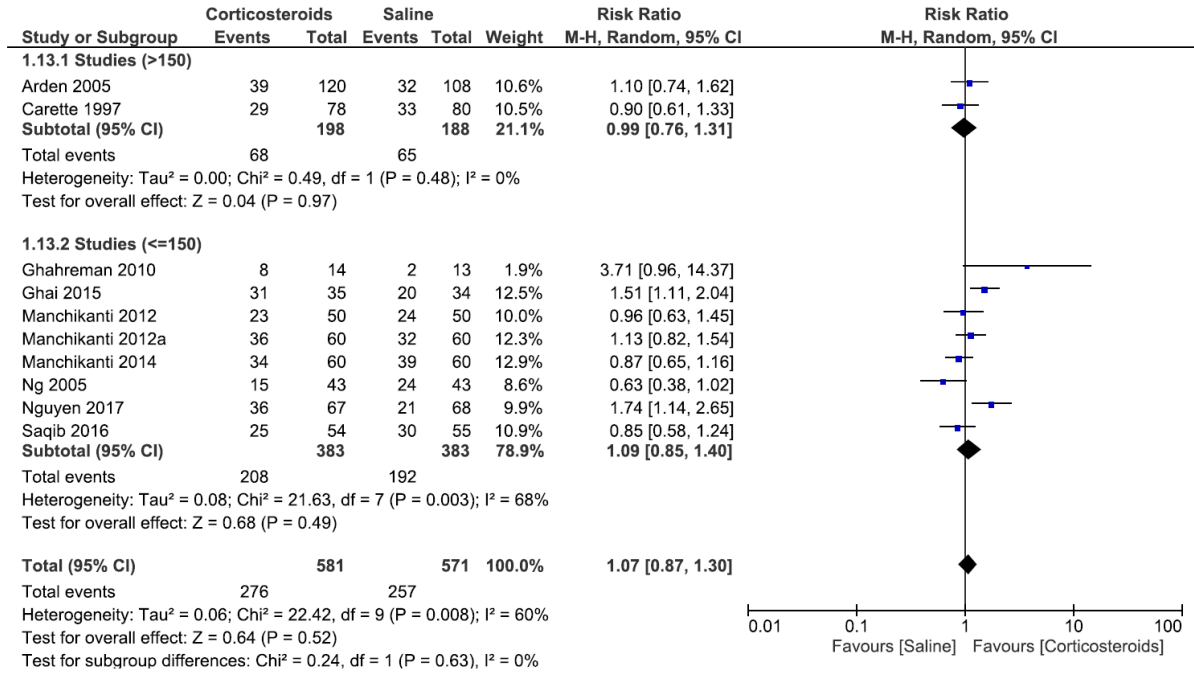

## Adverse Events

**Table 7: Overall Adverse Events**

Ordered Intervention by in Alphabetical Order

| Intervention Type | Type of Adverse Event     | Randomized Controlled Trials | Intervention Control                                                                    | # of RCTs | # of Participants | Intervention Event Rate | Control Event Rate | Risk Ratio (95% Confidence Interval)     | NNH |
|-------------------|---------------------------|------------------------------|-----------------------------------------------------------------------------------------|-----------|-------------------|-------------------------|--------------------|------------------------------------------|-----|
| Acupuncture       | Adverse Events            | Brinkhaus 2006               | Acupuncture<br>Minimal Acupuncture                                                      | 1         | 219               | 10.3%<br>(15/146)       | 16.4%<br>(12/73)   | RR 0.63<br>(95% CI<br>0.31,<br>1.27)*    | NSS |
| Acupuncture       | Adverse Events            | Cherkin 2009                 | Standardized<br>Acupuncture +<br>Individualized<br>Acupuncture<br>Simulated Acupuncture | 1         | 477               | 3.8%<br>(12/315)        | 0%<br>(0/162)      | RR 12.90<br>(95% CI<br>0.77,<br>216.44)* | NSS |
| Acupuncture       | Adverse Events            | Kerr 2003                    | Acupuncture<br>Placebo-TENS                                                             | 1         | 60                | 6.7%<br>(2/30)          | 6.7%<br>(2/30)     | RR 1.00<br>(95% CI<br>0.15,<br>6.64)*    | NSS |
| Acupuncture       | Adverse Events            | Meng 2003                    | Acupuncture + Standard<br>Therapy<br>Standard Therapy                                   | 1         | 51                | 32.1%<br>(9/28)         | 26.1%<br>(6/23)    | RR 1.23<br>(95% CI<br>0.51,<br>2.95)*    | NSS |
| Acupuncture       | Adverse Events            | Qin 2019                     | Acupuncture<br>Sham Acupuncture                                                         | 1         | 80                | 7.5%<br>(3/40)          | 12.5%<br>(5/40)    | RR 0.60<br>(95% CI<br>0.15,<br>2.34)*    | NSS |
| Acupuncture       | Serious Adverse<br>Events | Haake 2007                   | Verum Acupuncture<br>Sham Acupuncture                                                   | 1         | 774               | 3.1%<br>(12/387)        | 3.1%<br>(12/387)   | RR 1.00<br>(95% CI<br>0.45,<br>2.20)*    | NSS |

|                        |                                                                     |               |                                      |   |     |               |               |                               |          |
|------------------------|---------------------------------------------------------------------|---------------|--------------------------------------|---|-----|---------------|---------------|-------------------------------|----------|
| <b>Acupuncture</b>     | Withdrawal due to Adverse Events                                    | Qin 2019      | Acupuncture Sham Acupuncture         | 1 | 80  | 2.5% (1/40)   | 0% (0/40)     | RR 3.00 (95% CI 0.13, 71.51)  | NSS      |
| <b>Anticonvulsants</b> | Loss of Balance                                                     | Atkinson 2016 | Gabapentin (Mean 3265 mg)            | 1 | 108 | 33% (18/55)   | 4% (2/53)     | RR 8.67 (95% CI 2.11, 35.57)* | <b>4</b> |
| <b>Anticonvulsants</b> | Decreased Concentration                                             | Atkinson 2016 | Gabapentin (Mean 3265 mg)            | 1 | 108 | 38% (21/55)   | 11% (6/53)    | RR 3.37 (95% CI 1.48, 7.70)*  | <b>4</b> |
| <b>Anticonvulsants</b> | Dry Mouth                                                           | Atkinson 2016 | Gabapentin (Mean 3265 mg)            | 1 | 108 | 40% (22/55)   | 19% (10/53)   | RR 2.12 (95% CI 1.11, 4.04)*  | <b>5</b> |
| <b>Anticonvulsants</b> | Fatigue                                                             | Atkinson 2016 | Gabapentin (Mean 3265 mg)            | 1 | 108 | 49% (27/55)   | 28% (15/53)   | RR 1.73 (1.05, 2.88)*         | <b>5</b> |
| <b>Anticonvulsants</b> | Dizziness                                                           | Atkinson 2016 | Gabapentin (Mean 3265 mg)<br>Placebo | 1 | 108 | 43.6% (24/55) | 26.4% (14/53) | RR 1.65 (95% CI 0.96, 2.84)*  | NSS      |
| <b>Anticonvulsants</b> | GI-Related (Nausea, Vomiting, Constipation, Diarrhea)               | Atkinson 2016 | Gabapentin (Mean 3265 mg)<br>Placebo | 1 | 108 | 36.4% (20/55) | 45.3% (24/53) | RR 0.80 (95% CI 0.51, 1.27)*  | NSS      |
| <b>Anticonvulsants</b> | Sexual Side Effects (Erectile Dysfunction, Decreased Sexual Desire) | Atkinson 2016 | Gabapentin (Mean 3265 mg)<br>Placebo | 1 | 108 | 20% (11/55)   | 7.5% (4/53)   | RR 2.65 (95% CI 0.90, 7.81)*  | NSS      |
| <b>Anticonvulsants</b> | Sleep Disturbances                                                  | Atkinson 2016 | Gabapentin (Mean 3265 mg)<br>Placebo | 1 | 108 | 50.9% (28/55) | 39.6% (21/53) | RR 1.28 (95% CI               | NSS      |

|                        |                                        |               |                                                        |   |     |                   |                |                                         |     |
|------------------------|----------------------------------------|---------------|--------------------------------------------------------|---|-----|-------------------|----------------|-----------------------------------------|-----|
|                        |                                        |               |                                                        |   |     |                   |                | 0.84,<br>1.96)*                         |     |
| <b>Anticonvulsants</b> | Weight Gain                            | Atkinson 2016 | Gabapentin (Mean 3265 mg)<br>Placebo                   | 1 | 108 | 10.9%<br>(6/55)   | 1.9%<br>(1/53) | RR 5.78<br>(95% CI<br>0.72,<br>46.43)*  | NSS |
| <b>Anticonvulsants</b> | Withdrawal<br>Due to Adverse<br>Events | Atkinson 2016 | Gabapentin (Mean 3265 mg)<br>Placebo                   | 1 | 108 | 12.7%<br>(7/55)   | 9.4%<br>(5/53) | RR 1.35<br>(95% CI<br>0.46,<br>3.99)*   | NSS |
| <b>Exercise</b>        | Adverse Events                         | Saper 2017a   | Yoga<br>Back Pain Help Book                            | 1 | 320 | 7.1%<br>(9/127)   | 3.1%<br>(1/32) | RR 2.27<br>(95% CI<br>0.30,<br>17.25)*  | NSS |
| <b>Exercise</b>        | Adverse Events                         | Saper 2017b   | Physical Therapy<br>Back Pain Help Book                | 1 | 320 | 10.9%<br>(14/129) | 0%<br>(0/32)   | RR 7.36<br>(95% CI<br>0.45,<br>120.24)* | NSS |
| <b>Exercise</b>        | Increased Back<br>Pain                 | Saper 2017a   | Yoga<br>Back Pain Help Book                            | 1 | 320 | 3.1%<br>(4/127)   | 3.1%<br>(1/32) | RR 1.01<br>(95% CI<br>0.12,<br>8.71)*   | NSS |
| <b>Exercise</b>        | Increased Back<br>Pain                 | Saper 2017b   | Physical Therapy<br>Back Pain Help Book                | 1 | 320 | 3.9%<br>(5/129)   | 0%<br>(0/32)   | RR 2.79<br>(95% CI<br>0.16,<br>49.24)*  | NSS |
| <b>Exercise</b>        | Increased Pain                         | Jensen 2012   | Physiotherapy-delivered<br>exercise<br>Prescribed rest | 1 | 100 | 6.1%<br>(3/49)    | 9.8%<br>(5/51) | RR 0.62<br>(95% CI<br>0.16,<br>2.47)*   | NSS |
| <b>Exercise</b>        | Joint Pain                             | Saper 2017a   | Yoga<br>Back Pain Help Book                            | 1 | 320 | 3.1%<br>(4/127)   | 0%<br>(0/32)   | RR 2.32<br>(95% CI<br>0.13,<br>42.03)*  | NSS |

|                                      |                                                 |              |                                                                                                              |   |     |                  |                 |                                        |     |
|--------------------------------------|-------------------------------------------------|--------------|--------------------------------------------------------------------------------------------------------------|---|-----|------------------|-----------------|----------------------------------------|-----|
| <b>Exercise</b>                      | Joint Pain                                      | Saper 2017b  | Physical Therapy<br>Back Pain Help Book                                                                      | 1 | 320 | 6.2%<br>(8/129)  | 0%<br>(0/32)    | RR 4.32<br>(95% CI<br>0.26,<br>72.87)* | NSS |
| <b>Exercise</b>                      | Mild Muscle<br>Soreness                         | Brodsky 2019 | Group Stretching<br>Self-Care Book                                                                           | 1 | 69  | 11.8%<br>(4/34)  | 8.6%<br>(3/35)  | RR 1.37<br>(95% CI<br>0.33,<br>5.68)*  | NSS |
| <b>Exercise</b>                      | Mild Adverse<br>Events                          | Costa 2009   | Physiotherapy-delivered<br>motor control exercises<br>Sham detuned<br>shortwave<br>diathermy/ultrasound      | 1 | 144 | 3.9%<br>(3/77)   | 2.6%<br>(2/77)  | RR 1.50<br>(95% CI<br>0.26,<br>8.73)*  | NSS |
| <b>Exercise</b>                      | Serious Adverse<br>Events                       | Saper 2017a  | Yoga<br>Back Pain Help Book                                                                                  | 1 | 320 | 0.79%<br>(1/127) | 0%<br>(0/32)    | RR 0.77<br>(95% CI<br>0.03,<br>18.56)* | NSS |
| <b>Corticosteroid<br/>Injections</b> | Accidental<br>Dural Puncture                    | Carette 1997 | Corticosteroid Injections<br>(0,3,6 weeks if no<br>marked improvement)<br>Saline Injections (0,3,6<br>weeks) | 1 | 158 | 1.3%<br>1/78     | 1.3%<br>1/80    | RR 1.03<br>(95% CI<br>0.07,<br>16.11)  | NSS |
| <b>Corticosteroid<br/>Injections</b> | Death                                           | Nguyen 2017  | Single Corticosteroid<br>Injection<br>Single Injection of<br>Contrast                                        | 1 | 135 | 1.5%<br>(1/67)   | 0%<br>(0/68)    | RR 3.04<br>(95% CI<br>0.13,<br>73.43)  | NSS |
| <b>Corticosteroid<br/>Injections</b> | Non-Specific<br>Headache                        | Arden 2005   | Corticosteroid Injections<br>(0,3,6 weeks)<br>Saline Injections (0,3,6<br>weeks)                             | 1 | 228 | 3.3%<br>(4/120)  | 3.7%<br>(4/108) | RR 0.90<br>(95% CI<br>0.23, 3.51)      | NSS |
| <b>Corticosteroid<br/>Injections</b> | Postdural<br>Puncture<br>Headache and<br>Nausea | Arden 2005   | Corticosteroid Injections<br>(0,3,6 weeks)<br>Saline Injections (0,3,6<br>weeks)                             | 1 | 228 | 1.7%<br>(2/120)  | 1.9%<br>(2/108) | RR 0.90<br>(95% CI<br>0.13, 6.28)      | NSS |

|                                  |                        |                                                       |                                                                                                                                                                                                                                                                                                  |   |      |                  |                  |                                        |           |
|----------------------------------|------------------------|-------------------------------------------------------|--------------------------------------------------------------------------------------------------------------------------------------------------------------------------------------------------------------------------------------------------------------------------------------------------|---|------|------------------|------------------|----------------------------------------|-----------|
| <b>Corticosteroid Injections</b> | Serious Adverse Events | Nguyen 2017                                           | Single Corticosteroid Injection<br>Single Injection of Contrast                                                                                                                                                                                                                                  | 1 | 135  | 0%<br>(0/67)     | 1.5%<br>(1/68)   | RR 0.34<br>(95% CI<br>0.01, 8.16)      | NSS       |
| <b>Corticosteroid Injections</b> | Transient Headache     | Carette 1997                                          | Corticosteroid Injections (0,3,6 weeks if no marked improvement)<br>Saline Injections (0,3,6 weeks)                                                                                                                                                                                              | 1 | 158  | 26.9%<br>(21/78) | 20.0%<br>(16/80) | RR 1.35<br>(95% CI<br>0.76, 2.38)      | NSS       |
| <b>Corticosteroid Injections</b> | Vasovagal Response     | Ghai 2015                                             | Corticosteroid and Lidocaine Injection (Multiple if pain relief of ≤50% was deteriorated, spaced at least 15 days)<br><br>Lidocaine Injection (Multiple if pain relief of ≤50% was deteriorated, spaced at least 15 days)                                                                        | 1 | 69   | 0%<br>(0/35)     | 2.9%<br>(1/34)   | RR 0.32<br>(95% CI<br>0.01, 7.69)      | NSS       |
| <b>Opioids</b>                   | Hot Flashes            | Peloso 2004                                           | <ul style="list-style-type: none"> <li>Tramadol/Acetaminopen ER 37.5/325mg 3-8 tabs per day</li> <li>Placebo</li> </ul>                                                                                                                                                                          | 1 | 336  | 7%<br>(11/167)   | 1%<br>(1/169)    | RR 11.13<br>(95% CI<br>1.45,<br>85.26) | <b>17</b> |
| <b>Opioids</b>                   | Hyperhidrosis          | Buynak 2010, Cristoph 2017, Peloso 2004, Uberall 2012 | <ul style="list-style-type: none"> <li>Oxycodone CR 20-50mg BID</li> <li>Tapentadol ER 100-250mg BID</li> <li>Tapentadol PR 200mg BID</li> <li>Cebranopadol 200-600mg QD</li> <li>Tramadol/Acetaminopen ER 37.5/325mg 3-8 tabs per day</li> <li>Tramadol ER 200mg QD</li> <li>Placebo</li> </ul> | 4 | 1874 | 9%<br>(97/1140)  | 0.4%<br>(3/734)  | RR 9.36<br>(95% CI<br>3.64,<br>24.07)  | <b>13</b> |



|                |            |                                                                |                                                                                                                                                                                                                                                                                                                                                |   |      |                   |                 |                                       |           |
|----------------|------------|----------------------------------------------------------------|------------------------------------------------------------------------------------------------------------------------------------------------------------------------------------------------------------------------------------------------------------------------------------------------------------------------------------------------|---|------|-------------------|-----------------|---------------------------------------|-----------|
| <b>Opioids</b> | Pruritus   | Buynak 2010,<br>Ruoff 2003                                     | <ul style="list-style-type: none"> <li>• Oxycodone CR 20-50mg BID</li> <li>• Tapentadol ER 100-250mg BID</li> <li>• Tramadol/Acetaminopen ER 37.5/325mg 1-8 tabs per day</li> <li>• Placebo</li> </ul>                                                                                                                                         | 2 | 1283 | 11%<br>(89/807)   | 2%<br>(8/476)   | RR 5.80<br>(95% CI<br>2.82,<br>11.94) | <b>11</b> |
| <b>Opioids</b> | Vomiting   | Buynak 2010,<br>Cristoph 2017,<br>Peloso 2004,<br>Uberall 2012 | <ul style="list-style-type: none"> <li>• Oxycodone CR 20-50mg BID</li> <li>• Tapentadol ER 100-250mg BID</li> <li>• Tapentadol PR 200mg BID</li> <li>• Cebranopadol 200-600mg QD</li> <li>• Tramadol/Acetaminopen ER 37.5/325mg 3-8 tabs per day</li> <li>• Tramadol ER 200mg QD</li> <li>• Placebo</li> </ul>                                 | 4 | 2174 | 14%<br>(208/1440) | 2%<br>(15/734)  | RR 5.50<br>(95% CI<br>3.25, 9.32)     | <b>9</b>  |
| <b>Opioids</b> | Somnolence | Buynak 2010,<br>Cristoph 2017,<br>Peloso 2004,<br>Ruoff 2003   | <ul style="list-style-type: none"> <li>• Oxycodone CR 20-50mg BID</li> <li>• Tapentadol ER 100-250mg BID</li> <li>• Tapentadol PR 200mg BID</li> <li>• Cebranopadol 200-600mg QD</li> <li>• Tramadol/Acetaminopen ER 37.5/325mg 3-8 tabs per day</li> <li>• Tramadol/Acetaminopen ER 37.5/325mg 1-8 tabs per day</li> <li>• Placebo</li> </ul> | 4 | 2256 | 16%<br>(231/1485) | 3%<br>(21/771)  | RR 5.20<br>(95% CI<br>3.34, 8.08)     | <b>8</b>  |
| <b>Opioids</b> | Anorexia   | Peloso 2004                                                    | <ul style="list-style-type: none"> <li>• Tramadol/Acetaminopen ER 37.5/325mg 3-8 tabs per day</li> <li>• Placebo</li> </ul>                                                                                                                                                                                                                    | 1 | 336  | 7%<br>(11/167)    | 2%<br>(3/169)   | RR 3.71<br>(95% CI<br>1.05,<br>13.06) | <b>21</b> |
| <b>Opioids</b> | Nausea     | Buynak 2010,<br>Cristoph 2017,<br>Lee 2013,<br>Peloso 2004,    | <ul style="list-style-type: none"> <li>• Oxycodone CR 20-50mg BID</li> <li>• Tapentadol ER 100-250mg BID</li> </ul>                                                                                                                                                                                                                            | 6 | 2737 | 26%<br>(454/1726) | 7%<br>(67/1011) | RR 3.62<br>(95% CI<br>2.83, 4.63)     | <b>6</b>  |

|                |              |                                                                               |                                                                                                                                                                                                                                                                                                                                                                                |   |      |                   |                |                                   |           |
|----------------|--------------|-------------------------------------------------------------------------------|--------------------------------------------------------------------------------------------------------------------------------------------------------------------------------------------------------------------------------------------------------------------------------------------------------------------------------------------------------------------------------|---|------|-------------------|----------------|-----------------------------------|-----------|
|                |              | Ruoff 2003,<br>Uberall 2012                                                   | <ul style="list-style-type: none"> <li>• Tapentadol PR 200mg BID</li> <li>• Cebranopadol 200-600mg QD</li> <li>• Tramadol/Acetaminopen ER 37.5/325mg 1-2tabs BID</li> <li>• Tramadol ER 200mg QD</li> <li>• Tramadol/Acetaminopen ER 37.5/325mg 3-8 tabs per day</li> <li>• Tramadol/Acetaminopen ER 37.5/325mg 1-8 tabs per day</li> <li>• Placebo</li> </ul>                 |   |      |                   |                |                                   |           |
| <b>Opioids</b> | Dry Mouth    | Buynak 2010,<br>Peloso 2004,<br>Ruoff 2003,<br>Uberall 2012                   | <ul style="list-style-type: none"> <li>• Oxycodone CR 20-50mg BID</li> <li>• Tapentadol ER 100-250mg BID</li> <li>• Tramadol ER 200mg QD</li> <li>• Tramadol/Acetaminopen ER 37.5/325mg 3-8 tabs per day</li> <li>• Tramadol/Acetaminopen ER 37.5/325mg 1-8 tabs per day</li> <li>• Placebo</li> </ul>                                                                         | 4 | 1855 | 7%<br>(77/1090)   | 2%<br>(16/765) | RR 3.24<br>(95% CI<br>1.88, 5.61) | <b>21</b> |
| <b>Opioids</b> | Constipation | Buynak 2010,<br>Cristoph 2017,<br>Peloso 2004,<br>Ruoff 2003,<br>Uberall 2012 | <ul style="list-style-type: none"> <li>• Oxycodone CR 20-50mg BID</li> <li>• Tapentadol ER 100-250mg BID</li> <li>• Tapentadol PR 200mg BID</li> <li>• Cebranopadol 200-600mg QD</li> <li>• Tramadol ER 200mg QD</li> <li>• Tramadol/Acetaminopen ER 37.5/325mg 3-8 tabs per day</li> <li>• Tramadol/Acetaminopen ER 37.5/325mg 1-8 tabs per day</li> <li>• Placebo</li> </ul> | 5 | 2737 | 17%<br>(276/1601) | 5%<br>(45/891) | RR 3.17<br>(95% CI<br>2.32, 4.35) | <b>9</b>  |

|                |           |                                                                             |                                                                                                                                                                                                                                                                                                                                                                                                                                           |   |      |                   |                   |                                   |           |
|----------------|-----------|-----------------------------------------------------------------------------|-------------------------------------------------------------------------------------------------------------------------------------------------------------------------------------------------------------------------------------------------------------------------------------------------------------------------------------------------------------------------------------------------------------------------------------------|---|------|-------------------|-------------------|-----------------------------------|-----------|
| <b>Opioids</b> | Dizziness | Buynak 2010, Cristoph 2017, Lee 2013, Peloso 2004, Ruoff 2003, Uberall 2012 | <ul style="list-style-type: none"> <li>• Oxycodone CR 20-50mg BID</li> <li>• Tapentadol ER 100-250mg BID</li> <li>• Tapentadol PR 200mg BID</li> <li>• Cebranopadol 200-600mg QD</li> <li>• Tramadol/Acetaminopen ER 37.5/325mg 1-2tabs BID</li> <li>• Tramadol ER 200mg QD</li> <li>• Tramadol/Acetaminopen ER 37.5/325mg 3-8 tabs per day</li> <li>• Tramadol/Acetaminopen ER 37.5/325mg 1-8 tabs per day</li> <li>• Placebo</li> </ul> | 6 | 2737 | 24%<br>(409/1722) | 8%<br>(80/1007)   | RR 2.77<br>(95% CI<br>2.21, 3.47) | <b>7</b>  |
| <b>Opioids</b> | Fatigue   | Buynak 2010, Cristoph 2017, Ruoff 2003, Uberall 2012                        | <ul style="list-style-type: none"> <li>• Oxycodone CR 20-50mg BID</li> <li>• Tapentadol ER 100-250mg BID</li> <li>• Tapentadol PR 200mg BID</li> <li>• Cebranopadol 200-600mg QD</li> <li>• Tramadol ER 200mg QD</li> <li>• Tramadol/Acetaminopen ER 37.5/325mg 1-8 tabs per day</li> <li>• Placebo</li> </ul>                                                                                                                            | 4 | 2156 | 9%<br>(136/1434)  | 3%<br>(23/722)    | RR 2.30<br>(95% CI<br>1.46, 3.62) | <b>16</b> |
| <b>Opioids</b> | Headache  | Buynak 2010, Cristoph 2017, Lee 2013, Peloso 2004, Ruoff 2003, Uberall 2012 | <ul style="list-style-type: none"> <li>• Oxycodone CR 20-50mg BID</li> <li>• Tapentadol ER 100-250mg BID</li> <li>• Tapentadol PR 200mg BID</li> <li>• Cebranopadol 200-600mg QD</li> <li>• Tramadol/Acetaminopen ER 37.5/325mg 1-2tabs BID</li> <li>• Tramadol ER 200mg QD</li> </ul>                                                                                                                                                    | 6 | 2737 | 14%<br>(244/1726) | 10%<br>(106/1011) | RR 1.35<br>(95% CI<br>1.09, 1.67) | <b>28</b> |

|                |                          |                                          |                                                                                                                                                                                                                                                |   |      |                   |                  |                                |     |
|----------------|--------------------------|------------------------------------------|------------------------------------------------------------------------------------------------------------------------------------------------------------------------------------------------------------------------------------------------|---|------|-------------------|------------------|--------------------------------|-----|
|                |                          |                                          | <ul style="list-style-type: none"> <li>• Tramadol/Acetaminopen ER 37.5/325mg 3-8 tabs per day</li> <li>• Tramadol/Acetaminopen ER 37.5/325mg 1-8 tabs per day</li> <li>• Placebo</li> </ul>                                                    |   |      |                   |                  |                                |     |
| <b>Opioids</b> | Abdominal Discomfort     | Uberall 2012                             | <ul style="list-style-type: none"> <li>• Tramadol ER 200mg QD</li> <li>• Placebo</li> </ul>                                                                                                                                                    | 1 | 236  | 4.3%<br>(5/116)   | 5.0%<br>(6/120)  | RR 0.86<br>(95% CI 0.27, 2.75) | NSS |
| <b>Opioids</b> | Diarrhea                 | Buynak 2010                              | <ul style="list-style-type: none"> <li>• Oxycodone CR 20-50mg BID</li> <li>• Tapentadol ER 100-250mg BID</li> <li>• Placebo</li> </ul>                                                                                                         | 1 | 965  | 4%<br>(27/646)    | 7%<br>(23/319)   | RR 0.56<br>(95% CI 0.25, 1.23) | NSS |
| <b>Opioids</b> | Dyspepsia                | Buynak 2010, Lee 2013, Uberall 2012      | <ul style="list-style-type: none"> <li>• Oxycodone CR 20-50mg BID</li> <li>• Tapentadol ER 100-250mg BID</li> <li>• Tramadol/Acetaminopen ER 37.5/325mg 1-2tabs BID</li> <li>• Tramadol ER 200mg QD</li> <li>• Placebo</li> </ul>              | 3 | 1146 | 4%<br>(38/887)    | 4%<br>(21/559)   | RR 1.22<br>(95% CI 0.71, 2.08) | NSS |
| <b>Opioids</b> | Hepatic Enzyme Increased | Uberall 2012                             | <ul style="list-style-type: none"> <li>• Tramadol ER 200mg QD</li> <li>• Placebo</li> </ul>                                                                                                                                                    | 1 | 236  | 0%<br>(0/115)     | 4.2%<br>(5/120)  | RR 0.09<br>(95% CI 0.01, 1.68) | NSS |
| <b>Opioids</b> | Insomnia                 | Buynak 2010                              | <ul style="list-style-type: none"> <li>• Oxycodone CR 20-50mg BID</li> <li>• Tapentadol ER 100-250mg BID</li> <li>• Placebo</li> </ul>                                                                                                         | 1 | 965  | 5.9%<br>(38/646)  | 2.8%<br>(9/319)  | RR 1.98<br>(95% CI 0.86, 4.53) | NSS |
| <b>Opioids</b> | Serious Adverse Event    | Buynak 2010, Cristoph 2017, Uberall 2012 | <ul style="list-style-type: none"> <li>• Oxycodone CR 20-50mg BID</li> <li>• Tapentadol ER 100-250mg BID</li> <li>• Tapentadol PR 200mg BID</li> <li>• Cebranopadol 200-600mg QD</li> <li>• Tramadol ER 200mg QD</li> <li>• Placebo</li> </ul> | 3 | 2166 | 2.4%<br>(30/1273) | 0.88%<br>(5/565) | RR 2.10<br>(95% CI 0.81, 5.48) | NSS |

|                    |                                   |             |                                                                                                                         |   |     |                    |                   |                                       |           |
|--------------------|-----------------------------------|-------------|-------------------------------------------------------------------------------------------------------------------------|---|-----|--------------------|-------------------|---------------------------------------|-----------|
| <b>Opioids</b>     | Sinusitis                         | Ruoff 2003  | <ul style="list-style-type: none"> <li>Tramadol/Acetaminopen ER 37.5/325mg 1-8 tabs per day</li> <li>Placebo</li> </ul> | 1 | 318 | 5.0%<br>(8/161)    | 3.2%<br>(5/157)   | RR 1.56<br>(95% CI<br>0.52, 4.67)     | NSS       |
| <b>Opioids</b>     | Upper Respiratory Tract Infection | Ruoff 2003  | <ul style="list-style-type: none"> <li>Tramadol/Acetaminopen ER 37.5/325mg 1-8 tabs per day</li> <li>Placebo</li> </ul> | 1 | 318 | 5.6%<br>(9/161)    | 7.6%<br>(12/157)  | RR 0.73<br>(95% CI<br>0.32, 1.69)     | NSS       |
| <b>Oral NSAIDs</b> | ≥1 Adverse Event                  | Coats 2004  | Valdecoxib 40 mg daily<br>Placebo                                                                                       | 1 | 293 | 35%<br>(52/148)    | 24%<br>(35/145)   | RR 1.46<br>(95% CI<br>1.01,<br>2.09)* | <b>10</b> |
| <b>Oral NSAIDs</b> | Any adverse event                 | Katz 2003   | Rofecoxib 25 mg<br>Placebo                                                                                              | 1 | 461 | 48.1%<br>(112/233) | 40.8%<br>(93/228) | RR 1.78<br>(95% CI<br>0.96,<br>1.45)* | NSS       |
| <b>Oral NSAIDs</b> | Any adverse event                 | Katz 2003   | Rofecoxib 50 mg<br>Placebo                                                                                              | 1 | 457 | 46.3%<br>(106/229) | 40.8%<br>(93/228) | RR 1.13<br>(95% CI<br>0.92,<br>1.40)* | NSS       |
| <b>Oral NSAIDs</b> | Any adverse event                 | Katz 2011   | Naproxen 1000 mg daily<br>Placebo                                                                                       | 1 | 129 | 61.4%<br>(54/88)   | 65.9%<br>(27/41)  | RR 0.93<br>(95% CI<br>0.71,<br>1.23)* | NSS       |
| <b>Oral NSAIDs</b> | Arthralgia                        | Kivitz 2013 | Naproxen 1000 mg daily<br>Placebo                                                                                       | 1 | 525 | 1.4%<br>(4/295)    | 1.7%<br>(4/230)   | RR 0.78<br>(95% CI<br>0.20, 3.08)     | NSS       |
| <b>Oral NSAIDs</b> | Congestive Heart Failure          | Katz 2003   | Rofecoxib 25 mg<br>Placebo                                                                                              | 1 | 461 | 0.4%<br>(1/233)    | 0%<br>(0/228)     | RR 2.94<br>(95% CI<br>0.12,<br>71.70) | NSS       |
| <b>Oral NSAIDs</b> | Diarrhea                          | Katz 2003   | Rofecoxib 25 mg<br>Placebo                                                                                              | 1 | 461 | 7.3%<br>(17/233)   | 3.5%<br>(8/228)   | RR 2.08<br>(95% CI<br>0.92,<br>4.72)* | NSS       |
| <b>Oral NSAIDs</b> | Diarrhea                          | Katz 2003   | Rofecoxib 50 mg<br>Placebo                                                                                              | 1 | 457 | 4.8%<br>(11/229)   | 3.5%<br>(8/228)   | RR 1.37<br>(95% CI<br>0.56, 3.34)     | NSS       |

|                    |                          |                                         |                                   |   |      |                  |                  |                                       |     |
|--------------------|--------------------------|-----------------------------------------|-----------------------------------|---|------|------------------|------------------|---------------------------------------|-----|
| <b>Oral NSAIDs</b> | Dizziness                | Kivitz 2013                             | Naproxen 1000 mg daily<br>Placebo | 1 | 525  | 1.4%<br>(4/295)  | 3.0%<br>(7/230)  | RR 0.45<br>(95% CI<br>0.13, 1.50)     | NSS |
| <b>Oral NSAIDs</b> | Edema                    | Katz 2003a<br>Katz 2003b<br>Kivitz 2013 | Oral NSAIDs<br>Placebo            | 2 | 1215 | 2.2%<br>(17/757) | 0.87%<br>(4/458) | RR 2.12<br>(95% CI<br>0.68, 6.65)     | NSS |
| <b>Oral NSAIDs</b> | Headache                 | Katz 2003a<br>Katz 2003b<br>Kivitz 2013 | Oral NSAIDs<br>Placebo            | 2 | 1215 | 5.9%<br>(45/757) | 7.0%<br>(32/458) | RR 0.78<br>(95% CI<br>0.50, 1.21)     | NSS |
| <b>Oral NSAIDs</b> | Hyperesthesia            | Kivitz 2013                             | Naproxen 1000 mg daily<br>Placebo | 1 | 525  | 0%<br>(0/295)    | 0.87%<br>(2/230) | RR 0.16<br>(95% CI<br>0.01, 3.24)     | NSS |
| <b>Oral NSAIDs</b> | Hypertension             | Katz 2003                               | Rofecoxib 25 mg<br>Placebo        | 1 | 461  | 0.86%<br>(2/233) | 0.88%<br>(2/228) | RR 0.98<br>(95% CI<br>0.14, 6.89)     | NSS |
| <b>Oral NSAIDs</b> | Hypertension             | Katz 2003                               | Rofecoxib 50 mg<br>Placebo        | 1 | 457  | 2.2%<br>(5/229)  | 0.88%<br>(2/228) | RR 2.49<br>(95% CI<br>0.49,<br>12.70) | NSS |
| <b>Oral NSAIDs</b> | Hypoesthesia             | Kivitz 2013                             | Naproxen 1000 mg daily<br>Placebo | 1 | 525  | 2.7%<br>(8/295)  | 2.6%<br>(6/230)  | RR 1.04<br>(95% CI<br>0.37, 2.95)     | NSS |
| <b>Oral NSAIDs</b> | MSK Pain                 | Kivitz 2013                             | Naproxen 1000 mg daily<br>Placebo | 1 | 525  | 1.0%<br>(3/295)  | 3.0%<br>(7/230)  | RR 0.33<br>(95% CI<br>0.09, 1.28)     | NSS |
| <b>Oral NSAIDs</b> | Muscle Spasms            | Kivitz 2013                             | Naproxen 1000 mg daily<br>Placebo | 1 | 525  | 0.68%<br>(2/295) | 0.87%<br>(2/230) | RR 0.78<br>(95% CI<br>0.11, 5.49)     | NSS |
| <b>Oral NSAIDs</b> | Myocardial<br>Infarction | Katz 2003                               | Rofecoxib 50 mg<br>Placebo        | 1 | 457  | 0.4%<br>(1/229)  | 0%<br>(0/228)    | RR 2.99<br>(95% CI<br>0.12,<br>72.94) | NSS |
| <b>Oral NSAIDs</b> | Nasopharyngitis          | Kivitz 2013                             | Naproxen 1000 mg daily<br>Placebo | 1 | 525  | 3.1%<br>(9/295)  | 0.87%<br>(2/230) | RR 3.51<br>(95% CI<br>0.77,<br>16.08) | NSS |

|                     |                                         |                                                                    |                                                          |   |      |                    |                    |                                       |     |
|---------------------|-----------------------------------------|--------------------------------------------------------------------|----------------------------------------------------------|---|------|--------------------|--------------------|---------------------------------------|-----|
| <b>Oral NSAIDs</b>  | Nausea                                  | Kivitz 2013                                                        | Naproxen 1000 mg daily<br>Placebo                        | 1 | 525  | 3.1%<br>(9/295)    | 0.87%<br>(2/230)   | RR 3.51<br>(95% CI<br>0.77,<br>16.08) | NSS |
| <b>Oral NSAIDs</b>  | Pain in<br>extremity                    | Kivitz 2013                                                        | Naproxen 1000 mg daily<br>Placebo                        | 1 | 525  | 0.68%<br>(2/295)   | 1.7%<br>(4/230)    | RR 0.39<br>(95% CI<br>0.07, 2.11)     | NSS |
| <b>Oral NSAIDs</b>  | Paresthesia                             | Kivitz 2013                                                        | Naproxen 1000 mg daily<br>Placebo                        | 1 | 525  | 1.7%<br>(5/295)    | 2.2%<br>(5/230)    | RR 0.78<br>(95% CI<br>0.23, 2.66)     | NSS |
| <b>Oral NSAIDs</b>  | Serious Adverse<br>Events               | Coats 2004<br>Katz 2011                                            | Oral NSAIDs<br>Placebo                                   | 2 | 422  | 3.0%<br>(7/236)    | 2.7%<br>(5/186)    | RR 1.11<br>(95% CI<br>0.36, 3.43)     | NSS |
| <b>Oral NSAIDs</b>  | Treatment-<br>related adverse<br>events | Katz 2011                                                          | Naproxen 1000 mg daily<br>Placebo                        | 1 | 129  | 18.2%<br>(16/88)   | 22.0%<br>(9/41)    | RR 0.83<br>(95% CI<br>0.40,<br>1.71)* | NSS |
| <b>Oral NSAIDs</b>  | Upper<br>Respiratory<br>Infection       | Katz 2003a<br>Katz 2003b<br>Kivitz 2013                            | Oral NSAIDs<br>Placebo                                   | 2 | 1215 | 4.5%<br>(34/757)   | 4.4%<br>(20/458)   | RR 1.01<br>(95% CI<br>0.59, 1.75)     | NSS |
| <b>Oral NSAIDs</b>  | Urinary Tract<br>Infection              | Kivitz 2013                                                        | Naproxen 1000 mg daily<br>Placebo                        | 1 | 525  | 2.0%<br>(6/295)    | 3.5%<br>(8/230)    | RR 0.58<br>(95% CI<br>0.21, 1.66)     | NSS |
| <b>Oral NSAIDs</b>  | Withdrawal due<br>to Adverse<br>Events  | Coats 2004<br>Katz 2003a<br>Katz 2003b<br>Katz 2011<br>Kivitz 2013 | Oral NSAIDs<br>Placebo                                   | 4 | 1637 | 3.7%<br>(37/993)   | 3.1%<br>(20/644)   | RR 1.36<br>(95% CI<br>0.53, 3.51)     | NSS |
| <b>Oral NSAIDs</b>  | ≥1 adverse<br>event                     | Kivitz 2013                                                        | Naproxen 1000 mg daily<br>Placebo                        | 1 | 525  | 48.1%<br>(142/295) | 52.2%<br>(120/230) | RR 0.92<br>(95% CI<br>0.78, 1.10)     | NSS |
| <b>Rubefacients</b> | Heat Sensation                          | Chrubasik<br>2010, Keitel<br>2001                                  | Capsaicin 0.05% Cream<br>applied 3x/day<br>Placebo Cream | 2 | 292  | 78.9%<br>(127/145) | 32.4%<br>(60/147)  | RR 2.10<br>(95% CI<br>1.73, 2.56)     | 3   |

|                          |                                               |                              |                                                                                                   |   |     |                    |                   |                                 |     |
|--------------------------|-----------------------------------------------|------------------------------|---------------------------------------------------------------------------------------------------|---|-----|--------------------|-------------------|---------------------------------|-----|
|                          |                                               |                              | Capsaicin Plaster<br>Placebo Plaster                                                              |   |     |                    |                   |                                 |     |
| <b>Rubefacients</b>      | Mild or Moderate Local Erythema               | Frerick 2003                 | Capsaicin Plaster applied once daily for 4-8 hours<br>Placebo Plaster                             | 1 | 301 | 67.6%<br>(100/148) | 48.4%<br>(75/153) | RR 1.38<br>(95% CI 1.13, 1.68)  | 6   |
| <b>Rubefacients</b>      | Local Mild Inflammation                       | Frerick 2003                 | Capsaicin Plaster applied once daily for 4-8 hours<br>Placebo Plaster                             | 1 | 301 | 18.9%<br>(28/148)  | 11.8%<br>(18/153) | RR 1.61<br>(95% CI 0.93, 2.78)  | NSS |
| <b>Rubefacients</b>      | Pruritus                                      | Chrubasik 2010, Keitel 2001  | Capsaicin 0.05% Cream applied 3x/day<br>Placebo Cream<br><br>Capsaicin Plaster<br>Placebo Plaster | 2 | 292 | 29.0%<br>(42/145)  | 17.7%<br>(26/147) | RR 1.86<br>(95% CI 0.78, 4.45)  | NSS |
| <b>SNRI (Duloxetine)</b> | Dizziness                                     | Konno 2016, Skljarevski 2010 | Duloxetine 60mg/day<br>Placebo                                                                    | 2 | 859 | 5.3%<br>(23/430)   | 0.93%<br>(4/429)  | RR 5.55<br>(95% CI 1.92, 16.02) | 23  |
| <b>SNRI (Duloxetine)</b> | Nausea                                        | Konno 2016, Skljarevski 2010 | Duloxetine 60mg/day<br>Placebo                                                                    | 2 | 859 | 13.3%<br>(57/430)  | 2.8%<br>(12/429)  | RR 4.65<br>(95% CI 2.53, 8.57)  | 10  |
| <b>SNRI (Duloxetine)</b> | Somnolence                                    | Konno 2016                   | Duloxetine 60mg/day<br>Placebo                                                                    | 1 | 458 | 19.4%<br>(45/232)  | 7.1%<br>(16/226)  | RR 2.74<br>(95% CI 1.60, 4.70)  | 9   |
| <b>SNRI (Duloxetine)</b> | Withdrawal due to AE                          | Sklijarevski 2010            | Duloxetine 60mg/day<br>Placebo                                                                    | 1 | 458 | 18.5%<br>(53/287)  | 8.5%<br>(10/117)  | RR 2.16<br>(95% CI 1.14, 4.10)  | 11  |
| <b>SNRI (Duloxetine)</b> | At Least one Treatment Emergent Adverse Event | Sklijarevski 2010a           | Duloxetine 60-120mg/day<br>Placebo                                                                | 1 | 236 | 56.5%<br>(65/115)  | 47.9%<br>(58/121) | RR 1.41<br>(95% CI 0.85, 2.36)  | NSS |



|                            |                                    |                                       |                                                       |   |     |                   |                   |                                    |     |
|----------------------------|------------------------------------|---------------------------------------|-------------------------------------------------------|---|-----|-------------------|-------------------|------------------------------------|-----|
| <b>SNRI (Duloxetine)</b>   | At Least one Serious Adverse Event | Sklijarevski 2009, Sklijarevski 2010a | Duloxetine 60-120mg/day<br>Placebo                    | 2 | 640 | 2.2%<br>(9/402)   | 1.7%<br>(4/238)   | RR 1.18<br>(95% CI<br>0.35, 3.98)  | NSS |
| <b>SNRI (Duloxetine)</b>   | Constipation                       | Konno 2016, Skljarevski 2010          | Duloxetine 60mg/day<br>Placebo                        | 2 | 859 | 8.1%<br>(35/430)  | 3.0%<br>(13/429)  | RR 2.48<br>(95% CI<br>0.66, 9.31)  | NSS |
| <b>SNRI (Duloxetine)</b>   | Contusion                          | Konno 2016                            | Duloxetine 60mg/day<br>Placebo                        | 1 | 458 | 6.9%<br>(16/232)  | 3.1%<br>(7/226)   | RR 2.23<br>(95% CI<br>0.93, 5.31)  | NSS |
| <b>SNRI (Duloxetine)</b>   | Dry Mouth                          | Konno 2016, Skljarevski 2010          | Duloxetine 60mg/day<br>Placebo                        | 2 | 859 | 6.0%<br>(26/430)  | 1.0%<br>(4/429)   | RR 6.76<br>(95% CI<br>0.68, 67.37) | NSS |
| <b>SNRI (Duloxetine)</b>   | Nasopharyngitis                    | Konno 2016                            | Duloxetine 60mg/day<br>Placebo                        | 1 | 458 | 11.2%<br>(26/232) | 17.3%<br>(39/226) | RR 0.65<br>(95% CI<br>0.41, 1.03)  | NSS |
| <b>SNRI (Duloxetine)</b>   | Serious Adverse Events             | Sklijarevski 2010                     | Duloxetine 60mg/day<br>Placebo                        | 1 | 458 | 1.7%<br>(5/287)   | 2.6%<br>(3/117)   | RR 0.68<br>(95% CI<br>0.17, 2.80)  | NSS |
| <b>Spinal Manipulation</b> | Adverse Events                     | Goertz 2017                           | Spinal Manipulation +<br>Medical Care<br>Medical Care | 1 | 83  | 50.0%<br>(22/44)  | 5.1%<br>(2/39)    | RR 9.75<br>(95% CI<br>2.45, 38.83) | 3   |
| <b>Spinal Manipulation</b> | Adverse Events                     | Bond 2020                             | Spinal Manipulation<br>Sham Manipulation              | 1 | 29  | 7.1%<br>(1/14)    | 0%<br>(0/15)      | RR 3.2<br>(95% CI<br>0.14, 72.63)  | NSS |
| <b>Spinal Manipulation</b> | Adverse Events                     | Licciardone 2013                      | Spinal Manipulation<br>Sham Manipulation              | 1 | 455 | 7.0%<br>(16/230)  | 4.9%<br>(11/225)  | RR 1.42<br>(95% CI<br>0.68, 3.00)  | NSS |
| <b>Spinal Manipulation</b> | Local, mild joint pain             | Bond 2020                             | Spinal Manipulation<br>Sham Manipulation              | 1 | 29  | 7.1%<br>(1/14)    | 0%<br>(0/15)      | RR 3.2<br>(95% CI<br>0.14, 72.63)  | NSS |

|                            |                                |                  |                                                            |   |     |               |              |                              |     |
|----------------------------|--------------------------------|------------------|------------------------------------------------------------|---|-----|---------------|--------------|------------------------------|-----|
| <b>Spinal Manipulation</b> | Serious Adverse Events         | Licciardone 2013 | Spinal Manipulation Sham Manipulation                      | 1 | 455 | 2.6% (6/230)  | 1.3% (3/225) | RR 1.96 (95% CI 0.50, 7.73)  | NSS |
| <b>Topical NSAIDs</b>      | Adverse Events                 | Song 2008        | Flubiprofen Tape (63 mg/day); Worn 12-24 hours/day Placebo | 1 | 127 | 25.9% (22/85) | 50% (21/42)  | RR 0.52 (95% CI 0.32, 0.83)* | 5   |
| <b>Topical NSAIDs</b>      | Application Site Rash          | Song 2008        | Flubiprofen Tape (63 mg/day); Worn 12-24 hours/day Placebo | 1 | 127 | 3.5% (3/85)   | 9.5% (4/42)  | RR 0.37 (95% CI 0.09, 1.58)* | NSS |
| <b>Topical NSAIDs</b>      | Arthralgia                     | Song 2008        | Flubiprofen Tape (63 mg/day); Worn 12-24 hours/day Placebo | 1 | 127 | 0% (0/85)     | 4.8% (2/42)  | RR 0.10 (95% CI 0.00, 2.04)* | NSS |
| <b>Topical NSAIDs</b>      | Dizziness                      | Song 2008        | Flubiprofen Tape (63 mg/day); Worn 12-24 hours/day Placebo | 1 | 127 | 2.4% (2/85)   | 4.8% (2/42)  | RR 0.49 (95% CI 0.07, 3.39)* | NSS |
| <b>Topical NSAIDs</b>      | Erythema at Application Site   | Song 2008        | Flubiprofen Tape (63 mg/day); Worn 12-24 hours/day Placebo | 1 | 127 | 7.1% (6/85)   | 9.5% (4/42)  | RR 0.74 (95% CI 0.22, 2.49)* | NSS |
| <b>Topical NSAIDs</b>      | Headache                       | Song 2008        | Flubiprofen Tape (63 mg/day); Worn 12-24 hours/day Placebo | 1 | 127 | 3.5% (3/85)   | 9.5% (4/42)  | RR 0.37 (95% CI 0.09, 1.58)* | NSS |
| <b>Topical NSAIDs</b>      | Insomnia                       | Song 2008        | Flubiprofen Tape (63 mg/day); Worn 12-24 hours/day Placebo | 1 | 127 | 0% (0/85)     | 4.8% (2/42)  | RR 0.10 (95% CI 0.00, 2.04)* | NSS |
| <b>Topical NSAIDs</b>      | Irritation at Application Site | Song 2008        | Flubiprofen Tape (63 mg/day); Worn 12-24 hours/day Placebo | 1 | 127 | 7.1% (6/85)   | 7.1% (3/42)  | RR 0.99 (95% CI 0.26, 3.76)* | NSS |

|                       |                                  |           |                                                               |   |     |                |                 |                                       |     |
|-----------------------|----------------------------------|-----------|---------------------------------------------------------------|---|-----|----------------|-----------------|---------------------------------------|-----|
| <b>Topical NSAIDs</b> | Joint Stiffness                  | Song 2008 | Flubiprofen Tape (63 mg/day); Worn 12-24 hours/day<br>Placebo | 1 | 127 | 0%<br>(0/85)   | 2.4%<br>(1/42)  | RR 0.17<br>(95% CI<br>0.01,<br>4.01)* | NSS |
| <b>Topical NSAIDs</b> | Neck Pain                        | Song 2008 | Flubiprofen Tape (63 mg/day); Worn 12-24 hours/day<br>Placebo | 1 | 127 | 0%<br>(0/85)   | 2.4%<br>(1/42)  | RR 0.17<br>(95% CI<br>0.01,<br>4.01)* | NSS |
| <b>Topical NSAIDs</b> | Pain in Extremities              | Song 2008 | Flubiprofen Tape (63 mg/day); Worn 12 hours/day<br>Placebo    | 1 | 127 | 0%<br>(0/85)   | 2.4%<br>(1/42)  | RR 0.17<br>(95% CI<br>0.01,<br>4.01)* | NSS |
| <b>Topical NSAIDs</b> | Papular Rash                     | Song 2008 | Flubiprofen Tape (63 mg/day); Worn 12 hours/day<br>Placebo    | 1 | 127 | 0%<br>(0/85)   | 2.4%<br>(1/42)  | RR 0.17<br>(95% CI<br>0.01,<br>4.01)* | NSS |
| <b>Topical NSAIDs</b> | Paraesthesia at Application Site | Song 2008 | Flubiprofen Tape (63 mg/day); Worn 12-24 hours/day<br>Placebo | 1 | 127 | 0%<br>(0/85)   | 2.4%<br>(1/42)  | RR 0.17<br>(95% CI<br>0.01,<br>4.01)* | NSS |
| <b>Topical NSAIDs</b> | Pruritus at Application Site     | Song 2008 | Flubiprofen Tape (63 mg/day); Worn 12-24 hours/day<br>Placebo | 1 | 127 | 7.1%<br>(6/85) | 14.3%<br>(6/42) | RR 0.49<br>(95% CI<br>0.17,<br>1.44)* | NSS |
| <b>Topical NSAIDs</b> | Stomach Discomfort               | Song 2008 | Flubiprofen Tape (63 mg/day); Worn 12-24 hours/day<br>Placebo | 1 | 127 | 1.2%<br>(1/85) | 4.8%<br>(2/42)  | RR 0.25<br>(95% CI<br>0.02,<br>2.65)* | NSS |

RR: Risk Ratio; CI: Confidence Interval; RR: Risk Ratio; NNH: Number Needed to Harm; NSS: Not statistically significant; ER: Extended Release; CR: Controlled Release; QD: Once Daily; BID: Twice daily; mg: Milligrams

## Data Analysis of Adverse Events

### Oral NSAIDs

Figure 12.1 Oral NSAIDs versus placebo; Withdrawals due to Adverse Events

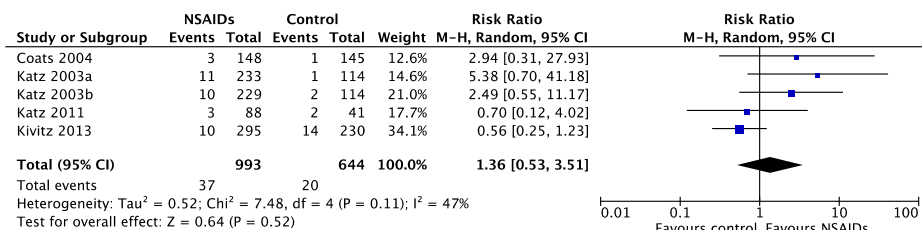

Figure 12.2 Oral NSAIDs versus placebo; Serious Adverse Events

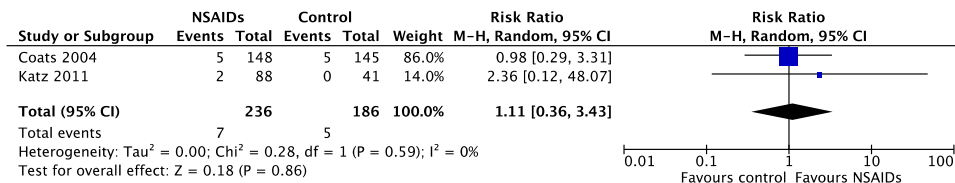

Figure 12.3 Oral NSAIDs versus placebo; Adverse Event: Edema

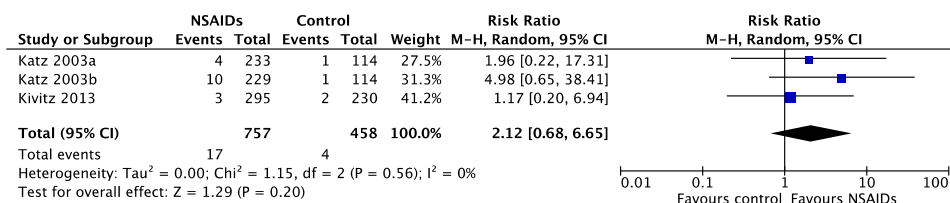

Figure 12.4 Oral NSAIDs versus placebo; Adverse Event: Headache

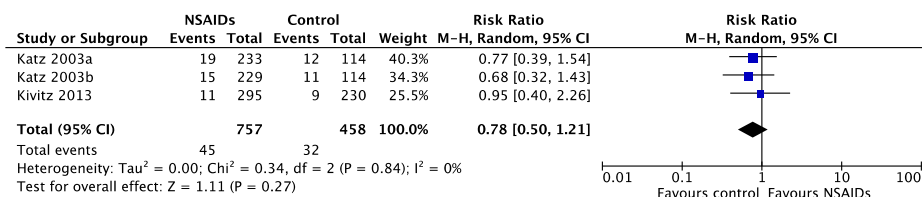

Figure 12.5 Oral NSAIDs versus placebo; Adverse Event: Upper Respiratory Infection

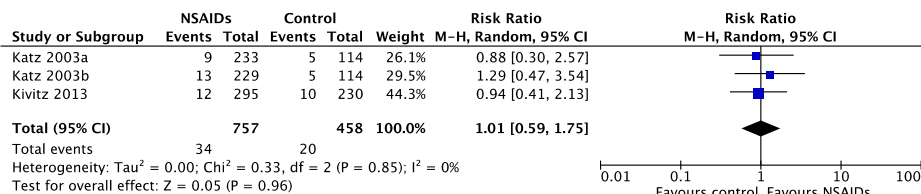

## Rubefacients

Figure 13.1 Rubefacients versus placebo; Adverse Event: Heat Sensation

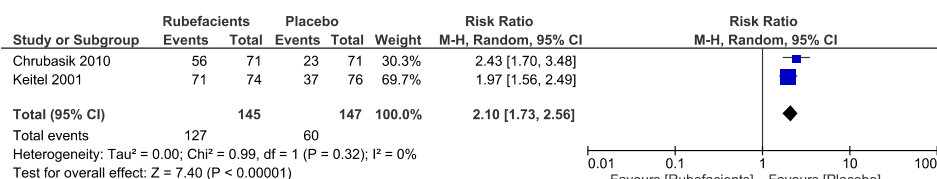

Figure 13.2 Rubefacients versus placebo; Adverse Event: Pruritus

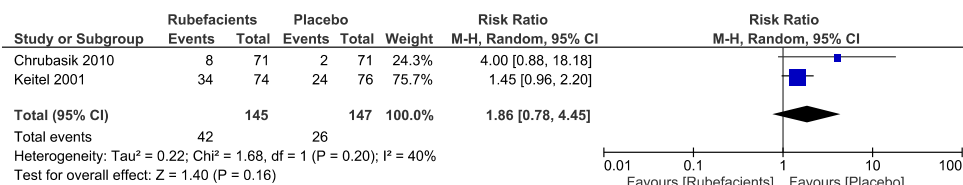

## Opioids

Figure 14.1 Opioids versus placebo; Withdrawals due to Adverse Events

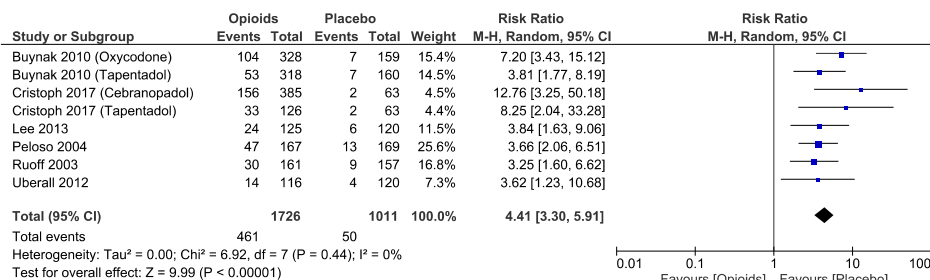

Figure 14.2 Opioids versus placebo; Serious Adverse Events

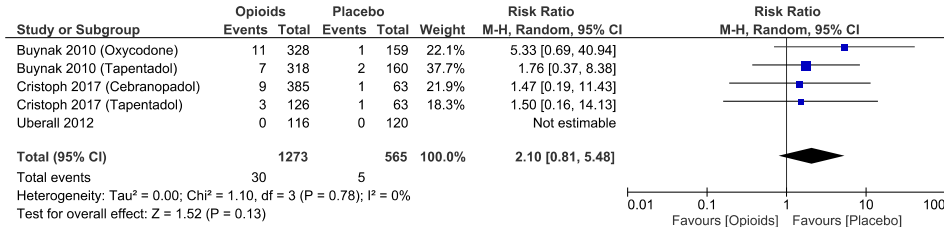

Figure 14.3 Opioids versus placebo; Adverse Event: Constipation

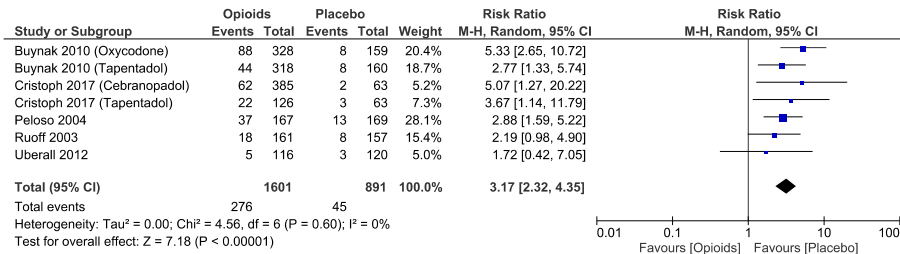

Figure 14.4 Opioids versus placebo; Adverse Event: Diarrhea

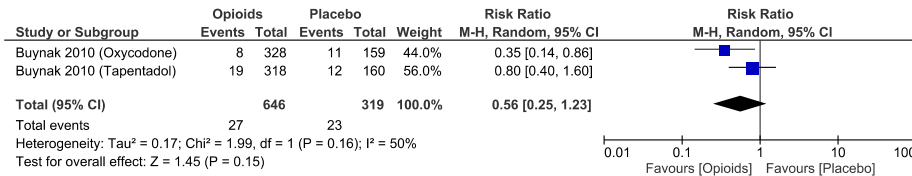

Figure 14.5 Opioids versus placebo; Adverse Event: Dizziness

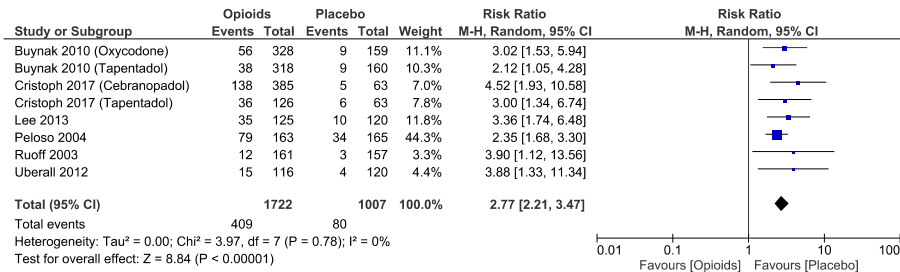

Figure 14.6 Opioids versus placebo; Adverse Event: Dry Mouth

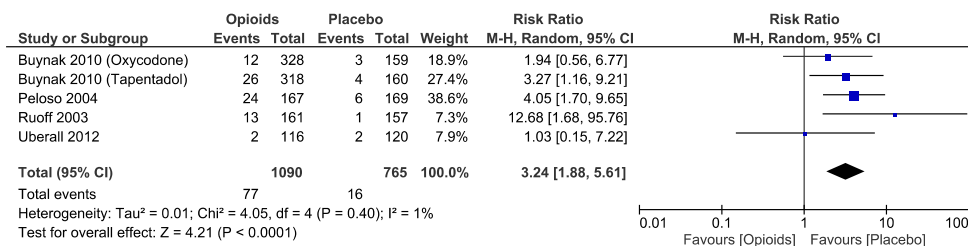

Figure 14.7 Opioids versus placebo; Adverse Event: Dyspepsia

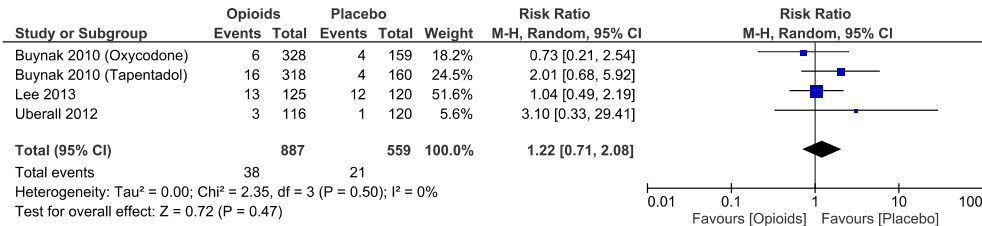

Figure 14.8 Opioids versus placebo; Adverse Event: Fatigue

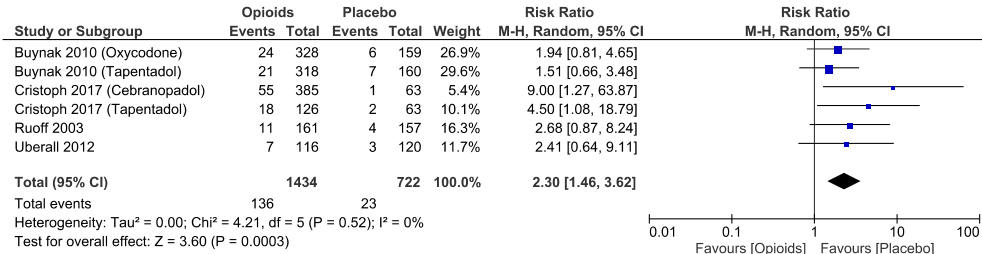

Figure 14.9 Opioids versus placebo; Adverse Event: Headache

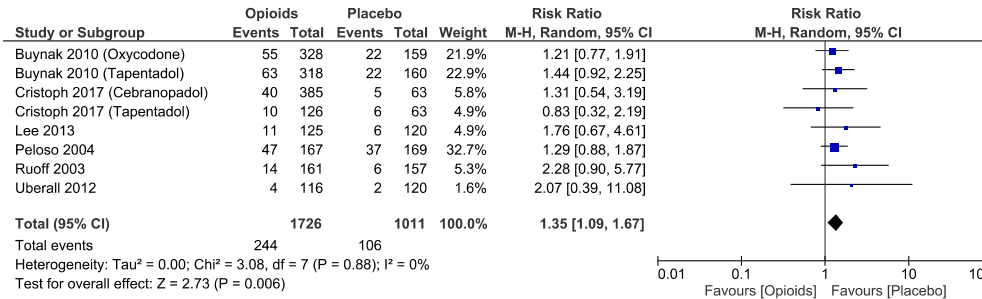

Figure 14.10 Opioids versus placebo; Adverse Event: Hyperhydrosis

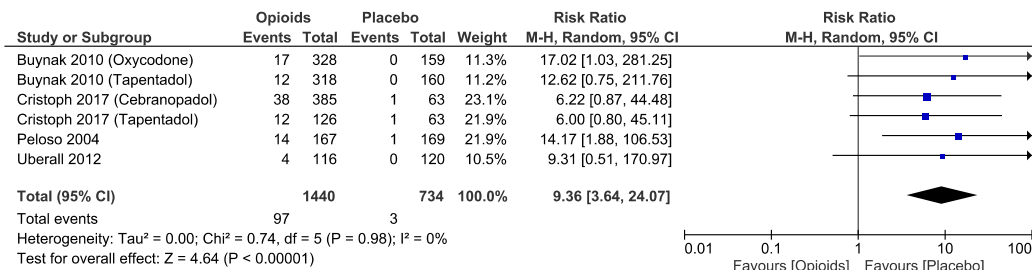

Figure 14.11 Opioids versus placebo; Adverse Event: Insomnia

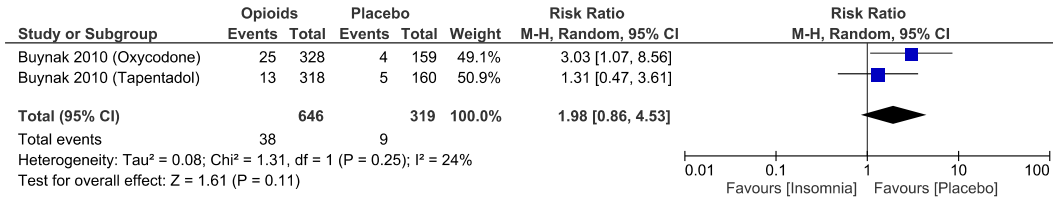

Figure 14.12 Opioids versus placebo; Adverse Event: Nausea

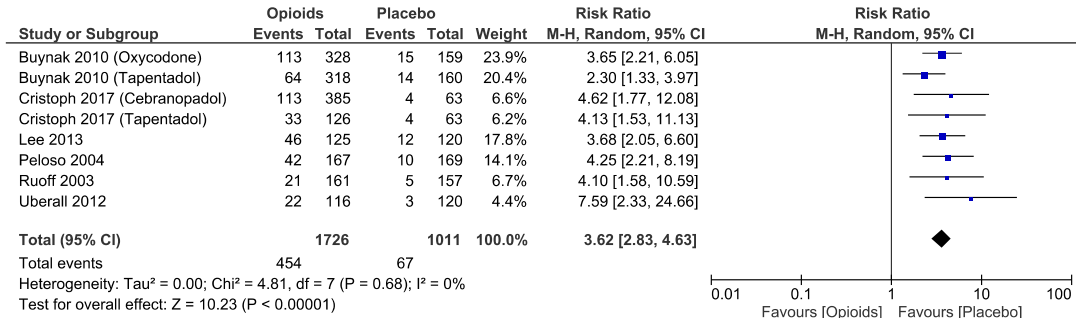

Figure 14.13 Opioids versus placebo; Adverse Event: Pruritis

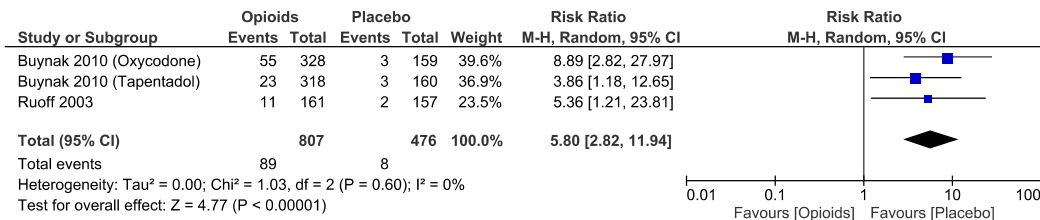

Figure 14.14 Opioids versus placebo; Adverse Event: Somnolence

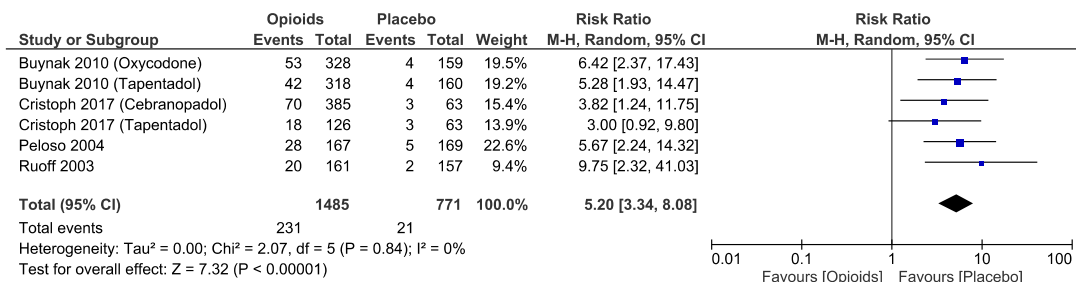



Figure 14.15 Opioids versus placebo; Adverse Event: Vomiting

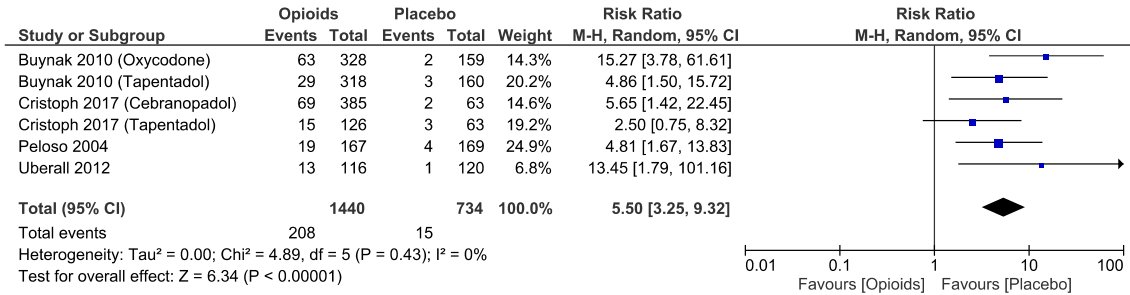

### SNRI (Duloxetine)

Figure 15.1 SNRI (Duloxetine) versus placebo; Withdrawals due to Adverse Events

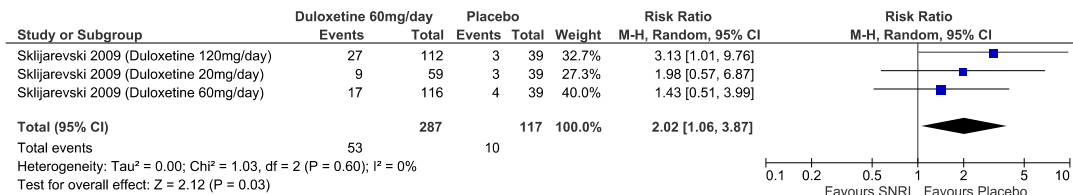

Figure 15.2 SNRI (Duloxetine) versus placebo; Serious Adverse Events

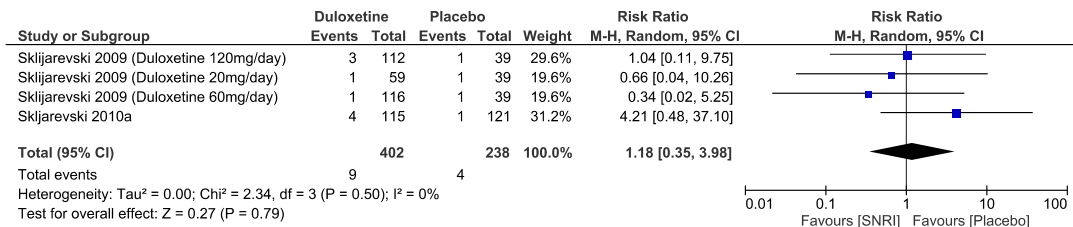

Figure 15.3 SNRI (Duloxetine) versus placebo; Adverse Event: Constipation

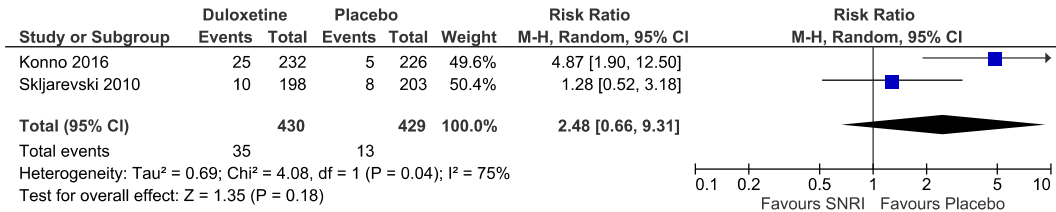

Figure 15.4 SNRI (Duloxetine) versus placebo; Adverse Event: Dizziness

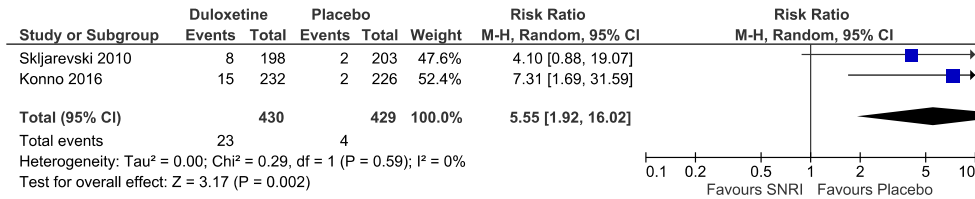

Figure 15.5 SNRI (Duloxetine) versus placebo; Adverse Event: Dry Mouth

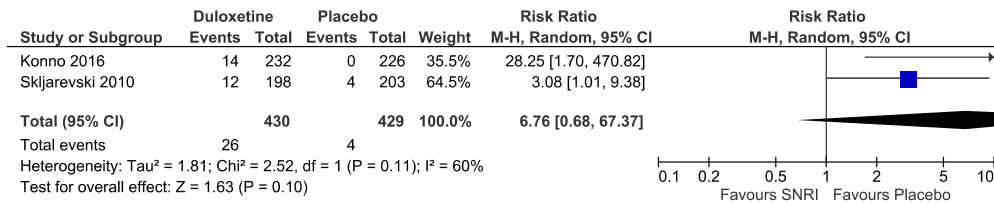

Figure 15.6 SNRI (Duloxetine) versus placebo; Adverse Event: Nausea

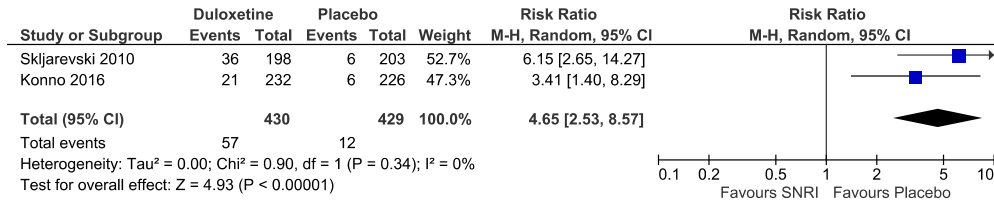

## Funnel Plots

Funnel plots were generated via RevMan for interventions with  $\geq 8$  studies. This information was used in the GRADE process to assess potential publication bias.

Figure 17.1 Exercise studies

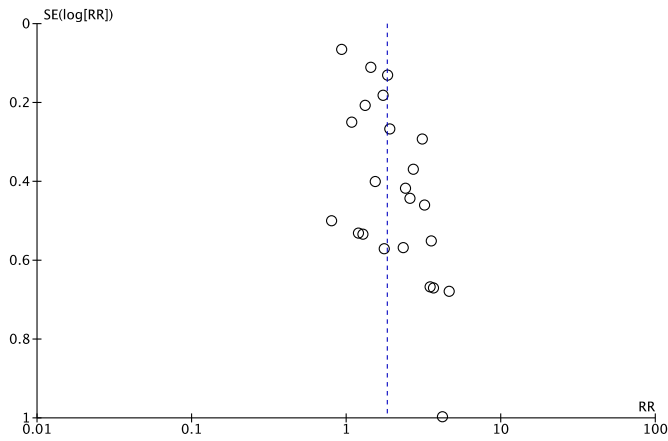

Smaller studies appear to be missing to the left of the effect line which may suggest some publication bias, but otherwise well balanced.

Figure 17.2 Acupuncture studies

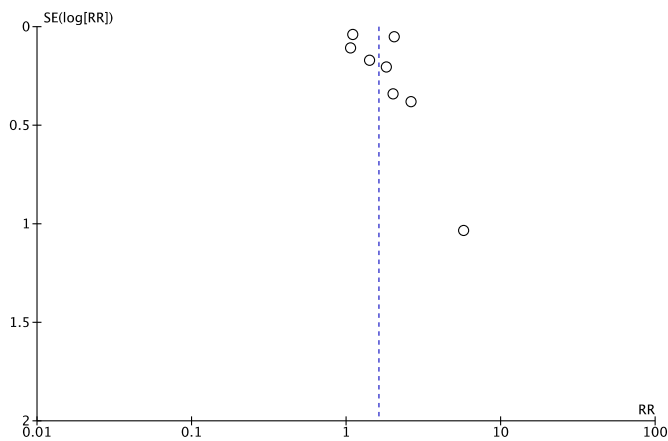

Smaller and larger studies appear to be missing to the left of the effect line which suggests publication bias.

Figure 17.3 Corticosteroid Injection studies

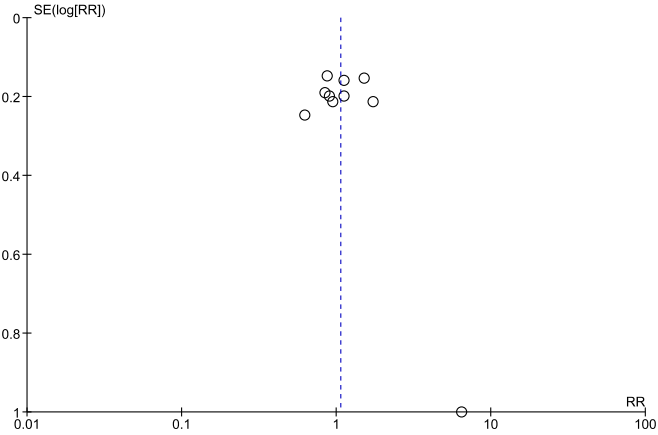

Funnel plot appears balanced.  
No suggestion of publication bias.

## **Quality Assessment**

### **Cochrane Risk of Bias Tables**

The Cochrane Risk of Bias is an assessment tool that addresses seven specific domains: sequence generation, allocation concealment, blinding of participants and personnel, blinding of outcome assessors, incomplete outcome data, selective outcome reporting, and other bias. Due to the subjective nature of the outcomes, we chose to split the 'blinding of participants and personnel' domain and use the 'other bias' domain specifically for blinding of personnel. Each domain was assigned a judgement related to the risk of bias, specifically 'low', 'high' or 'unclear' risk of bias.

### **Determining Risk of Bias Median**

To generate the meta-analyses that utilized a risk of bias median we assigned a quality score to each risk domain highlighted in the Cochrane Risk of Bias tool. Assignment is outlined as follows: (Low Risk = 0, Unclear Risk = 1, High Risk = 2). Each study had their domain assigned a number and the sum was found for each study. We determined the median and divided studies into two subgroups: Less than the median and Equal to or greater than the median.

Table 8.1 Exercise

|                  | Random sequence generation (selection bias) | Allocation concealment (selection bias) | Blinding of participants (performance bias) | Blinding of study personnel (performance bias) | Blinding of outcome assessment (detection bias) | Incomplete outcome data (attrition bias) | Selective reporting (reporting bias) |
|------------------|---------------------------------------------|-----------------------------------------|---------------------------------------------|------------------------------------------------|-------------------------------------------------|------------------------------------------|--------------------------------------|
| Albaledejo 2010  | ●                                           | ●                                       | ●                                           | ●                                              | ●                                               | ●                                        | ●                                    |
| Brandt 2015      | ?                                           | ?                                       | ●                                           | ●                                              | ●                                               | ●                                        | ●                                    |
| Brodsky 2019     | ●                                           | ●                                       | ●                                           | ?                                              | ●                                               | ●                                        | ?                                    |
| Chan 2017        | ●                                           | ●                                       | ●                                           | ●                                              | ●                                               | ●                                        | ●                                    |
| Costa 2009       | ●                                           | ●                                       | ●                                           | ●                                              | ●                                               | ●                                        | ●                                    |
| Cox 2010         | ●                                           | ●                                       | ●                                           | ●                                              | ●                                               | ●                                        | ●                                    |
| Ford 2016        | ●                                           | ●                                       | ●                                           | ●                                              | ●                                               | ●                                        | ●                                    |
| Frost 2004       | ●                                           | ●                                       | ●                                           | ●                                              | ●                                               | ●                                        | ●                                    |
| Groessl 2017     | ●                                           | ●                                       | ●                                           | ●                                              | ●                                               | ●                                        | ●                                    |
| Hall 2011        | ●                                           | ●                                       | ●                                           | ●                                              | ●                                               | ●                                        | ?                                    |
| Hartvigsen 2010a | ●                                           | ●                                       | ●                                           | ●                                              | ●                                               | ●                                        | ?                                    |
| Hartvigsen 2010b | ●                                           | ●                                       | ●                                           | ●                                              | ●                                               | ●                                        | ?                                    |
| Highland 2018    | ●                                           | ●                                       | ●                                           | ?                                              | ●                                               | ●                                        | ?                                    |
| Jensen 2012      | ●                                           | ●                                       | ●                                           | ●                                              | ●                                               | ●                                        | ?                                    |
| Moffett 1999     | ●                                           | ●                                       | ●                                           | ?                                              | ●                                               | ●                                        | ?                                    |
| Natour 2015      | ●                                           | ●                                       | ●                                           | ●                                              | ●                                               | ●                                        | ?                                    |
| Saper 2009       | ●                                           | ●                                       | ●                                           | ●                                              | ●                                               | ●                                        | ●                                    |
| Saper 2017a      | ●                                           | ●                                       | ●                                           | ●                                              | ●                                               | ●                                        | ?                                    |
| Saper 2017b      | ●                                           | ●                                       | ●                                           | ●                                              | ●                                               | ●                                        | ?                                    |
| Sherman 2005a    | ●                                           | ●                                       | ●                                           | ●                                              | ●                                               | ●                                        | ●                                    |
| Sherman 2005b    | ●                                           | ●                                       | ●                                           | ●                                              | ●                                               | ●                                        | ●                                    |
| Sherman 2011a    | ●                                           | ●                                       | ●                                           | ●                                              | ●                                               | ●                                        | ●                                    |
| Sherman 2011b    | ●                                           | ●                                       | ●                                           | ●                                              | ●                                               | ●                                        | ●                                    |

Table 8.2 Acupuncture

|                 | Random sequence generation (selection bias) | Allocation concealment (selection bias) | Blinding of participants (performance bias) | Blinding of study personnel (performance bias) | Blinding of outcome assessment (detection bias) | Incomplete outcome data (attrition bias) | Selective reporting (reporting bias) |
|-----------------|---------------------------------------------|-----------------------------------------|---------------------------------------------|------------------------------------------------|-------------------------------------------------|------------------------------------------|--------------------------------------|
| Brinkhaus 2006  | ●                                           | ●                                       | ●                                           | ●                                              | ?                                               | ●                                        | ?                                    |
| Cherkin 2009    | ●                                           | ?                                       | ●                                           | ●                                              | ●                                               | ●                                        | ●                                    |
| Coan 1980       | ●                                           | ●                                       | ●                                           | ●                                              | ?                                               | ●                                        | ●                                    |
| Haake 2007      | ●                                           | ●                                       | ●                                           | ●                                              | ●                                               | ?                                        | ?                                    |
| Hunter 2011     | ●                                           | ●                                       | ●                                           | ●                                              | ●                                               | ●                                        | ●                                    |
| Kerr 2003       | ●                                           | ●                                       | ●                                           | ●                                              | ●                                               | ●                                        | ?                                    |
| Meng 2003       | ●                                           | ●                                       | ●                                           | ●                                              | ?                                               | ●                                        | ?                                    |
| Molsberger 1998 | ●                                           | ●                                       | ●                                           | ●                                              | ●                                               | ●                                        | ?                                    |
| Qin 2019        | ●                                           | ●                                       | ●                                           | ●                                              | ●                                               | ●                                        | ●                                    |
| Witt 2006       | ●                                           | ●                                       | ●                                           | ●                                              | ?                                               | ●                                        | ?                                    |

Table 8.3 Spinal manipulation

|                  | Random sequence generation (selection bias) | Allocation concealment (selection bias) | Blinding of participants (performance bias) | Blinding of study personnel (performance bias) | Blinding of outcome assessment (detection bias) | Incomplete outcome data (attrition bias) | Selective reporting (reporting bias) |
|------------------|---------------------------------------------|-----------------------------------------|---------------------------------------------|------------------------------------------------|-------------------------------------------------|------------------------------------------|--------------------------------------|
| Bialosky 2014    | +                                           | +                                       | +                                           | -                                              | -                                               | +                                        | +                                    |
| Bond 2020        | +                                           | +                                       | +                                           | -                                              | +                                               | +                                        | +                                    |
| Ford 2019        | +                                           | +                                       | -                                           | -                                              | +                                               | -                                        | +                                    |
| Goertz 2017      | +                                           | +                                       | -                                           | -                                              | +                                               | +                                        | ?                                    |
| Licciardone 2013 | +                                           | +                                       | +                                           | -                                              | +                                               | +                                        | ?                                    |

Table 8.4 Oral NSAIDs

|             | Random sequence generation (selection bias) | Allocation concealment (selection bias) | Blinding of participants (performance bias) | Blinding of study personnel (performance bias) | Blinding of outcome assessment (detection bias) | Incomplete outcome data (attrition bias) | Selective reporting (reporting bias) |
|-------------|---------------------------------------------|-----------------------------------------|---------------------------------------------|------------------------------------------------|-------------------------------------------------|------------------------------------------|--------------------------------------|
| Coats 2004  | +                                           | +                                       | +                                           | +                                              | +                                               | -                                        | ?                                    |
| Katz 2003a  | +                                           | +                                       | +                                           | +                                              | +                                               | -                                        | ?                                    |
| Katz 2003b  | +                                           | +                                       | +                                           | +                                              | +                                               | -                                        | ?                                    |
| Katz 2011   | ?                                           | ?                                       | +                                           | +                                              | ?                                               | -                                        | ?                                    |
| Kivitz 2013 | ?                                           | ?                                       | +                                           | +                                              | +                                               | -                                        | ?                                    |

Table 8.5 Rubefacients

|                | Random sequence generation (selection bias) | Allocation concealment (selection bias) | Blinding of participants (performance bias) | Blinding of personnel (performance bias) | Blinding of outcome assessment (detection bias) | Incomplete outcome data (attrition bias) | Selective reporting (reporting bias) |
|----------------|---------------------------------------------|-----------------------------------------|---------------------------------------------|------------------------------------------|-------------------------------------------------|------------------------------------------|--------------------------------------|
| Chrubasik 2010 | +                                           | ?                                       | ?                                           | +                                        | +                                               | ?                                        | ?                                    |
| Frerick 2003   | +                                           | +                                       | ?                                           | +                                        | +                                               | -                                        | ?                                    |
| Keitel 2001    | ?                                           | ?                                       | ?                                           | +                                        | ?                                               | -                                        | ?                                    |

Table 8.6 Opioids

|                                    | Random sequence generation (selection bias) | Allocation concealment (selection bias) | Blinding of participants (performance bias) | Blinding of personnel (performance bias) | Blinding of outcome assessment (detection bias) | Incomplete outcome data (attrition bias) | Selective reporting (reporting bias) |
|------------------------------------|---------------------------------------------|-----------------------------------------|---------------------------------------------|------------------------------------------|-------------------------------------------------|------------------------------------------|--------------------------------------|
| Buynak 2010 (Oxycodone)            | +                                           | +                                       | ?                                           | ?                                        | ?                                               | +                                        | -                                    |
| Buynak 2010 (Tapentadol)           | +                                           | +                                       | ?                                           | ?                                        | ?                                               | +                                        | -                                    |
| Cristoph 2017 (Cebranopadol)       | +                                           | +                                       | ?                                           | ?                                        | ?                                               | +                                        | ?                                    |
| Cristoph 2017 (Cebranopadol 200mg) | +                                           | +                                       | ?                                           | ?                                        | ?                                               | +                                        | ?                                    |
| Cristoph 2017 (Cebranopadol 400mg) | +                                           | +                                       | ?                                           | ?                                        | ?                                               | +                                        | ?                                    |
| Cristoph 2017 (Cebranopadol 600mg) | +                                           | +                                       | ?                                           | ?                                        | ?                                               | +                                        | ?                                    |
| Cristoph 2017 (Tapentadol)         | +                                           | +                                       | ?                                           | ?                                        | ?                                               | +                                        | ?                                    |
| Lee 2013                           | +                                           | ?                                       | +                                           | ?                                        | ?                                               | ?                                        | ?                                    |
| Peloso 2004                        | +                                           | ?                                       | +                                           | ?                                        | ?                                               | ?                                        | ?                                    |
| Ruoff 2003                         | +                                           | ?                                       | ?                                           | ?                                        | ?                                               | ?                                        | ?                                    |
| Uberall 2012                       | +                                           | ?                                       | ?                                           | ?                                        | ?                                               | +                                        | ?                                    |



Table 8.7 SNRI (Duloxetine)

|                                          | Random sequence generation (selection bias) | Allocation concealment (selection bias) | Blinding of participants (performance bias) | Blinding of study personnel (performance bias) | Blinding of outcome assessment (detection bias) | Incomplete outcome data (attrition bias) | Selective reporting (reporting bias) |
|------------------------------------------|---------------------------------------------|-----------------------------------------|---------------------------------------------|------------------------------------------------|-------------------------------------------------|------------------------------------------|--------------------------------------|
| Konno 2016                               | +                                           | +                                       | +                                           | +                                              | +                                               | +                                        | +                                    |
| Sklijarevski 2009 (Duloxetine 120mg/day) | +                                           | +                                       | +                                           | +                                              | +                                               | -                                        | +                                    |
| Sklijarevski 2009 (Duloxetine 20mg/day)  | +                                           | +                                       | +                                           | +                                              | +                                               | -                                        | +                                    |
| Sklijarevski 2009 (Duloxetine 60mg/day)  | +                                           | +                                       | +                                           | +                                              | +                                               | -                                        | +                                    |
| Skjarevski 2009                          | +                                           | +                                       | +                                           | +                                              | +                                               | -                                        | +                                    |
| Skjarevski 2010                          | ?                                           | ?                                       | +                                           | +                                              | +                                               | -                                        | +                                    |
| Skjarevski 2010a                         | +                                           | +                                       | +                                           | +                                              | +                                               | -                                        | +                                    |

Table 8.8 Corticosteroid injections

|                   | Random sequence generation (selection bias) | Allocation concealment (selection bias) | Blinding of participants (performance bias) | Blinding of study personnel (performance bias) | Blinding of outcome assessment (detection bias) | Incomplete outcome data (attrition bias) | Selective reporting (reporting bias) |
|-------------------|---------------------------------------------|-----------------------------------------|---------------------------------------------|------------------------------------------------|-------------------------------------------------|------------------------------------------|--------------------------------------|
| Arden 2005        | +                                           | +                                       | +                                           | ?                                              | +                                               | -                                        | ?                                    |
| Carette 1997      | +                                           | ?                                       | ?                                           | +                                              | +                                               | -                                        | ?                                    |
| Ghahreman 2010    | +                                           | +                                       | +                                           | +                                              | +                                               | ?                                        | ?                                    |
| Ghai 2015         | +                                           | +                                       | +                                           | +                                              | +                                               | -                                        | ?                                    |
| Manchikanti 2012  | +                                           | +                                       | +                                           | +                                              | +                                               | -                                        | ?                                    |
| Manchikanti 2012a | +                                           | +                                       | +                                           | +                                              | +                                               | ?                                        | ?                                    |
| Manchikanti 2014  | +                                           | -                                       | +                                           | -                                              | +                                               | -                                        | ?                                    |
| Ng 2005           | +                                           | +                                       | +                                           | +                                              | +                                               | +                                        | -                                    |
| Nguyen 2017       | +                                           | +                                       | +                                           | -                                              | +                                               | +                                        | -                                    |
| Saqib 2016        | ?                                           | ?                                       | -                                           | ?                                              | -                                               | -                                        | -                                    |

**Table 9: GRADE Evaluation of Evidence Quality**

Ordered Interventions by Certainty in Evidence Followed by Highest Risk Ratio to Lowest Risk Ratio.

| Intervention              | Number of RCTs | Risk Ratio                     | Reasons for Downgrading                                          | Certainty in Evidence |
|---------------------------|----------------|--------------------------------|------------------------------------------------------------------|-----------------------|
| Exercise                  | 19             | RR 1.71<br>(95% CI 1.37, 2.15) | Risk of Bias (-1)                                                | Moderate              |
| Oral NSAIDs               | 4              | RR 1.44<br>(95% CI 1.17, 1.78) | Risk of Bias (-1)                                                | Moderate              |
| SNRI<br>(duloxetine)      | 4              | RR 1.25<br>(95% CI 1.13, 1.38) | Risk of Bias (-1)                                                | Moderate              |
| Spinal Manipulation       | 5              | RR 1.54<br>(95% CI 1.11, 2.12) | Risk of Bias (-1)<br>Inconsistency (-1)                          | Low                   |
| Rubefacients              | 3              | RR 1.39<br>(95% CI 1.20, 1.61) | Risk of Bias (-1)<br>Indirectness (-1)                           | Low                   |
| Acupuncture               | 10             | RR 1.58<br>(95% CI 1.13, 2.21) | Risk of Bias (-1)<br>Inconsistency (-1)<br>Publication Bias (-1) | Very low              |
| Opioids                   | 6              | RR 1.26<br>(95% CI 1.02, 1.55) | Risk of Bias (-1)<br>Indirectness (-1)<br>Imprecision (-1)       | Very low              |
| Corticosteroid Injections | 10             | RR 1.07<br>(95% CI 0.87, 1.30) | Risk of Bias (-1)<br>Inconsistency (-1)<br>Imprecision (-1)      | Very low              |

RCTs: Randomized Controlled Trials; RR: Risk Ratio; CI: Confidence Interval; RR: Risk Ratio NSAIDs: Nonsteroidal Anti-Inflammatory drugs SNRIs: Serotonin Norepinephrine Reuptake Inhibitor

**GRADE Criteria for Quality Assessment Sections**

|                        |                                                                                                                                                                                                                                                           |
|------------------------|-----------------------------------------------------------------------------------------------------------------------------------------------------------------------------------------------------------------------------------------------------------|
| Risk of Bias           | Consider allocation concealment, blinding, large losses to follow-up, ITT analysis, stopping early for benefit, etc.<br>Failure to report outcomes/selective reporting of outcomes                                                                        |
| Inconsistency          | Do the estimates of the treatment effect vary widely across studies?<br>Statistical heterogeneity, variability in results<br>Unexplained inconsistency/heterogeneity → decreased quality                                                                  |
| Indirectness           | Differences in population (i.e. patients or animal studies)<br>Differences in intervention (i.e. method or timing of delivery)<br>Differences in outcome measures (i.e. surrogates or length of time)<br>Indirect comparison (i.e. network meta-analyses) |
| Imprecision            | Does confidence interval cross threshold for clinical decision making?<br>Wide confidence intervals (few patients, few events)                                                                                                                            |
| Publication bias       | Small number of trials<br>Only industry funded trials included<br>Funnel plot                                                                                                                                                                             |
| Magnitude of effect    | Large and consistent estimates of the magnitude of a treatment effect<br>Large effect: RR >2 or <0.5; very large effect: RR >5 or <0.2                                                                                                                    |
| Dose response gradient | Presence of this gradient increases the confidence.                                                                                                                                                                                                       |
| Plausible confounding  | If residual confounding would be expected to bias the treatment effect in the opposite direction as observed - increases confidence in results.                                                                                                           |

Reference: Schünemann H, Brožek J, Guyatt G, Oxman A, editors. GRADE handbook for grading quality of evidence and strength of recommendations. Updated October 2013. The GRADE Working Group, 2013. Available from [guidelinedevelopment.org/handbook](http://guidelinedevelopment.org/handbook).

## Peer Review Comments/Feedback

### Peer Reviewer Information

5 reviewers including family physicians and allied health care professionals

\*NO competing conflicts of interest declared

### Strengths of the Systematic Review

This is an exceptionally good and helpful review of a common issue in primary care, low back pain. This review focuses on single interventions and included RCTs of adults with chronic (greater than 90 days) radicular or non-radicular low back pain. A list of pharmacological and non-pharmacological interventions are utilized with the primary outcome being a 30% reduction in pain. Multiple databases were used to search a large number of articles with 61 articles in the final review. The a-priori analyses to explore funding sources and duration of outcomes reported was a strength as was the examination of low back pain in a primary care setting. It was interesting to note acetaminophen, cannabinoids, muscle relaxants, SSRIs or TCAs did not meet inclusion criteria with an opportunity for future research.

Broad, looking at more or less every possible intervention out there. Sensitivity analyses were established a priori. Meta-analysis was done on an easily translatable outcome, that being percentage of patients who responded meaningfully, not some esoteric pain or function scale that means nothing to anyone.

Overall, congrats to the team on this excellent work. I appreciate the massive amount of work that goes into a SR/MA on one topic, let alone 15 in a review like this. However, I do have a few comments for the author team to consider... I think a main strength is that the process used in the review appears credible.

- Inclusion criteria – RCT, Responder analysis - Primary Studies assessed for risk of bias - Pre-specified analysis to explore heterogeneity - Use of the GRADE approach to determine Confidence in estimates.

Strengths of the systemic review are the breadth of articles reviewed and the choice of commonly used and commonly available treatment modalities. Limitation to responder analysis increases the strength of conclusions for a particular modality. The use of NNT's and NNH's as descriptors is for me , valuable. The use of the tables and forest plots is visually helpful.

Sufficient number of studies reviewed reasonable conclusions based on evidence reviewed.

### Weaknesses of the Systematic Review

As noted in the limitations section of the manuscript, the decision to combine heterogeneous interventions into one intervention category and the relatively few RCT's utilizing responder analysis are the weakness of this review. The diverse factors, subjective nature and varying responses to low back pain could be considered a challenge and weakness.

I was somewhat concerned that some of the questions addressed in the SR/MA may be a bit broad and because different interventions were combined the analyses display high heterogeneity (e.g., combining all exercise interventions: I2 = 75%;

[Authors' response: Manuscript revised. We felt that in an effort to limit additional sub-group analysis \(and the risk of chance findings\), that grouping potentially heterogenous non-pharmacological and pharmacological interventions was appropriate for this review. Whether groups that choose to sub-](#)

group interventions (e.g. different types of exercise or different classes of NSAIDs) find consistent and reliable, or inconsistent and confusing results remains to be seen.

Potentially the broad scope of the SR is a weakness, as stated in the discussion. Given the screening process and inclusion criteria of trials, it's likely any weakness that might have come from that was effectively mitigated.

Search: Search appears quite comprehensive (but others (Ioannidis see below) have included other databases (Central, Cinhal, Psychinfo, Lilacs)

Authors' response: Manuscript modified. Cochrane database was formally named "Central" and was included in search. Cinhal, Psychinfo and Lilacs databases were not applicable for this review.

Context: The paper lacks context about other existing reviews and guideline recommendations for the interventions reviewed. (Introduction and discussion section). A cursory search shows that several individual SR/MA have been done on the interventions included in this review.

- <https://pubmed.ncbi.nlm.nih.gov/25681408/>
- <https://pubmed.ncbi.nlm.nih.gov/26863524/>
- <https://pubmed.ncbi.nlm.nih.gov/18253994/>

o Also, it seems other papers have combined several SR/MA like done in this paper

<https://pubmed.ncbi.nlm.nih.gov/30563712/>

o How do the findings compare to previous reviews (particularly those that focused on SMD?)

Authors' response: Manuscript modified

o What specifically does this paper add to the large body of existing reviews?

Authors' response: Manuscript modified. Our systematic review was the first synthesis of multiple (15) different interventions for chronic low back pain that was led by primary care, reported outcomes through responder analysis, and included robust reporting of adverse events.

In the discussion section the short-term benefits of a modality eg. acupuncture <4 weeks may be helpful to point out to a greater extent as clinicians often separate short term and long-term management modalities in assessing their armamentarium for a condition. ( listed line 234 , 235)

Authors' response: This review focused on chronic ( $\geq 3$  months) low back pain. Whether findings should be re-analyzed into interventions that may be most effective for 'early' chronic low back pain (e.g. 3-6 months) or 'late' chronic low back pain (e.g. >6 months) will be forwarded to our chronic pain guideline committee.

Not sure if possible to separate out back pain studies done in chronic back pain aimed at return to work only -done by employers (probably future work/ review). Wondering if in return to work there is a greater problem than return to function in non-work groups?

Authors' response: Beyond the scope of this systematic review.

### Comments, considerations or changes

1. Publication Bias: 3 Funnel plots are presented in figures 17.1-17.3. but the manuscript is missing a description of how publication bias was assessed, the results of these assessments, and a conclusion regarding how publication bias affects confidence.

Authors' response: Manuscript and Appendix modified

2. Limitations: Given this is a paper that combines 15 different systematic reviews, I was watching to see if the any comments were going to be made about the comparative efficacy of the different interventions. It appears that the authors have avoided this temptation, although it was hard as a reader to not make comparisons between the interventions based on the way the manuscript is presented, which is not really appropriate based on the design (not a network MA). Address problem more head on in the limitations. It appears John Ioannides and his group are doing a SR & network MA of drug and non-drug interventions for chronic low back pain which will address these indirect comparisons.  
o <https://systematicreviewsjournal.biomedcentral.com/articles/10.1186/s13643-020-01398-3>

Authors' response: Addressed in knowledge translation tool (which was not available at time of manuscript peer review)

Comments: Overall great article to better alter poor management habits or support good management habits in a problem that is huge in primary care. Thanks for your effort.

Line 29 - you may define in brackets a rubefacient - not a common term used in general practice.

Authors' response: Manuscript modified

Line 123 Would it be helpful as a comparator to have NNH of oral NSAID's, as adverse effects often quoted as reason not to use and this review suggests some benefit?

Authors' response: NNH was not calculated due to no statistical difference between NSAIDs and placebo in withdrawals due to adverse events.

No specific comments, helpful review for family physicians, confirms my clinical experience, though the use of SNRI's is interesting and not common practice in my experience

## References

### Acupuncture

1. Brinkhaus B, Witt CM, Jena S, et al. Acupuncture in patients with chronic low back pain: a randomized controlled trial. 2006;166(4):450-457.
2. Cherkin DC, Sherman KJ, Avins AL, et al. A randomized trial comparing acupuncture, simulated acupuncture, and usual care for chronic low back pain. 2009;169(9):858-866.
3. Coan RM, Wong G, Ku SL, et al. The acupuncture treatment of low back pain: a randomized controlled study. 1980;8(1-2):181-189.
4. Haake M, Müller HH, Schade-Brittinger C, et al. German Acupuncture Trials (GERAC) for chronic low back pain: randomized, multicenter, blinded, parallel-group trial with 3 groups. 2007;167(17):1892-1898.
5. Hunter RF, McDonough SM, Bradbury I, et al. Exercise and auricular acupuncture for chronic low-back pain: A feasibility randomized-controlled trial. *The Clinical Journal of Pain*. 2011.
6. Kerr DP, Walsh DM, Baxter D. Acupuncture in the management of chronic low back pain: a blinded randomized controlled trial. 2003;19(6):364-370.
7. Meng CF, Wang D, Ngeow J, Lao L, Peterson M, Paget S. Acupuncture for chronic low back pain in older patients: a randomized, controlled trial. 2003;42(12):1508-1517.
8. Molsberger A, Winkler J, Schneider S, Mau J. Acupuncture and conventional orthopedic pain treatment in the management of chronic low back pain - a prospective randomised and controlled clinical trial. 1998(june):87.
9. Qin Z, Ding Y, Xu C, et al. Acupuncture vs Noninsertive Sham Acupuncture in Ageing Patients with Degenerative Lumbar Spinal Stenosis: a Randomized Controlled Trial. 2019.
10. Witt CM, Jena S, Selim D, et al. Pragmatic randomized trial evaluating the clinical and economic effectiveness of acupuncture for chronic low back pain. 2006;164(5):487-496.

### Anticonvulsants

11. Atkinson JH, Slater MA, Capparelli EV, et al. A randomized controlled trial of gabapentin for chronic low back pain with and without a radiating component. 2016;157(7):1499-1507.

### Corticosteroid Injections

12. Arden NK, Price C, Reading I, et al. A multicentre randomized controlled trial of epidural corticosteroid injections for sciatica: The WEST study. *Rheumatology*. 2005;44(11):1399-1406.
13. Carette S, Leclaire R, Marcoux S, et al. Epidural corticosteroid injections for sciatica due to herniated nucleus pulposus. *New England Journal of Medicine*. 1997;336(23):1634-1640.
14. Ghahreman A, Ferch R, Bogduk N. The efficacy of transforaminal injection of steroids for the treatment of lumbar radicular pain. *Pain medicine (Malden, Mass)*. 2010;11(8):1149-1168.

15. Ghai B, Kumar K, Bansal D, Dhatt SS, Kanukula R, Batra YK. Effectiveness of parasagittal interlaminar epidural local anesthetic with or without steroid in chronic lumbosacral pain: A randomized, double-blind clinical trial. *Pain Physician*. 2015;18(3):237-248.
16. Manchikanti L, Cash KA, McManus CD, Pampati V. Fluoroscopic caudal epidural injections in managing chronic axial low back pain without disc herniation, radiculitis, or facet joint pain. 2012;5:381-390.
17. Manchikanti L, Cash KA, McManus CD, Pampati V, Fellows B. Fluoroscopic caudal epidural injections with or without steroids in managing pain of lumbar spinal stenosis: One-year results of randomized, double-blind, active-controlled trial. *Journal of Spinal Disorders and Techniques*. 2012;25(4):226-234.
18. Manchikanti L, Cash KA, Pampati V, Falco FJE. Transforaminal epidural injections in chronic lumbar disc herniation: A randomized, double-blind, active-control trial. *Pain Physician*. 2014;17(4):E489-E501.
19. Ng L, Chaudhary N, Sell P. The efficacy of corticosteroids in periradicular infiltration for chronic radicular pain: a randomized, double-blind, controlled trial. 2005;30(8):857-862.
20. Nguyen C, Boutron I, Baron G, et al. Intradiscal Glucocorticoid Injection for Patients With Chronic Low Back Pain Associated With Active Discopathy: a Randomized Trial. 2017;166(8):547-556.
21. Saqib M, Bhatti SN, Khan MA, et al. Outcome Analysis Of Two Different Injection Solutions For Epidural Injection In Radicular Lumbar Backache Syndromes. *Journal of Ayub Medical College, Abbottabad : JAMC*. 2016;28(4):709-714.

### Exercise

22. Albaladejo C, Kovacs FM, Royuela A, del Pino R, Zamora J. The efficacy of a short education program and a short physiotherapy program for treating low back pain in primary care: a cluster randomized trial. 2010;35(5):483-496.
23. Brandt Y, Currier L, Plante TW, Schubert Kabban CM, Tvaryanas AP. A Randomized Controlled Trial of Core Strengthening Exercises in Helicopter Crewmembers with Low Back Pain. 2015;86(10):889-894.
24. Brodsky M, Hansen A, Bjerke W. Randomized Pilot Trial for a Community-Based Group Stretching Exercise Program for Chronic Low Back Pain. 2019;8.
25. Chan AYP, Ford JJ, Surkitt LD, et al. Individualised functional restoration plus guideline-based advice vs advice alone for non-reducible discogenic low back pain: a randomised controlled trial. 2017;103(2):121-130.
26. Costa LO, Maher CG, Latimer J, et al. Motor control exercise for chronic low back pain: a randomized placebo-controlled trial. 2009;89(12):1275-1286.
27. Cox H, Tilbrook H, Aplin J, et al. A randomised controlled trial of yoga for the treatment of chronic low back pain: results of a pilot study. 2010;16(4):187-193.
28. Ford JJ, Hahne AJ, Surkitt LD, et al. Individualised physiotherapy as an adjunct to guideline-based advice for low back disorders in primary care: a randomised controlled trial. 2016;50(4):237-245.
29. Frost H, Lamb SE, Doll HA, Carver PT, Stewart-Brown S. Randomised controlled trial of physiotherapy compared with advice for low back pain. 2004;329(7468):708.

30. Groessl EJ, Liu L, Chang DG, et al. Yoga for Military Veterans with Chronic Low Back Pain: a Randomized Clinical Trial. 2017;53(5):599-608.
31. Hall AM, Maher CG, Lam P, Ferreira M, Latimer J. Tai chi exercise for treatment of pain and disability in people with persistent low back pain: a randomized controlled trial. 2011;63(11):1576-1583.
32. Hartvigsen J, Morsø L, Bendix T, Manniche C. Supervised and non-supervised Nordic walking in the treatment of chronic low back pain: a single blind randomized clinical trial. 2010;11:30.
33. Highland KB, Schoemaker A, Rojas W, et al. Benefits of the Restorative Exercise and Strength Training for Operational Resilience and Excellence Yoga Program for Chronic Low Back Pain in Service Members: a Pilot Randomized Controlled Trial. 2018;99(1):91-98.
34. Jensen RK, Leboeuf-Yde C, Wedderkopp N, Sorensen JS, Manniche C. Rest versus exercise as treatment for patients with low back pain and Modic changes. A randomized controlled clinical trial. 2012;10:22.
35. Moffett JK, Torgerson D, Bell-Syer S, et al. Randomised controlled trial of exercise for low back pain: clinical outcomes, costs, and preferences. 1999;319(7205):279-283.
36. Natour J, Cazotti Lde A, Ribeiro LH, Baptista AS, Jones A. Pilates improves pain, function and quality of life in patients with chronic low back pain: a randomized controlled trial. 2015;29(1):59-68.
37. Saper RB, Lemaster C, Delitto A, et al. Yoga, Physical Therapy, or Education for Chronic Low Back Pain: a Randomized Noninferiority Trial. 2017;167(2):85-94.
38. Saper RB, Sherman KJ, Cullum-Dugan D, Davis RB, Phillips RS, Culpepper L. Yoga for chronic low back pain in a predominantly minority population: a pilot randomized controlled trial. 2009;15(6):18-27.
39. Sherman KJ, Cherkin DC, Erro J, Miglioretti DL, Deyo RA. Comparing yoga, exercise, and a self-care book for chronic low back pain: a randomized, controlled trial. 2005;143(12):849-856.
40. Sherman KJ, Cherkin DC, Wellman RD, et al. A randomized trial comparing yoga, stretching, and a self-care book for chronic low back pain. 2011;171(22):2019-2026.

### **Opioids**

41. Buynak R, Shapiro DY, Okamoto A, et al. Efficacy and safety of tapentadol extended release for the management of chronic low back pain: results of a prospective, randomized, double-blind, placebo- and active-controlled Phase III study. 2010;11(11):1787-1804.
42. Christoph A, Eerdekens MH, Kok M, Volkers G, Freynhagen R. Cebranopadol, a novel first-in-class analgesic drug candidate: first experience in patients with chronic low back pain in a randomized clinical trial. 2017;158(9):1813-1824.
43. Lee JH, Lee C-S, Ultracet ERSG. A randomized, double-blind, placebo-controlled, parallel-group study to evaluate the efficacy and safety of the extended-release tramadol hydrochloride/acetaminophen fixed-dose combination tablet for the treatment of chronic low back pain. *Clinical therapeutics*. 2013;35(11):1830-1840.



44. Peloso PM, Fortin L, Beaulieu A, Kamin M, Rosenthal N. Analgesic efficacy and safety of tramadol/ acetaminophen combination tablets (Ultracet) in treatment of chronic low back pain: a multicenter, outpatient, randomized, double blind, placebo controlled trial. 2004;31(12):2454-2463.
45. Ruoff GE, Rosenthal N, Jordan D, Karim R, Kamin M. Tramadol/acetaminophen combination tablets for the treatment of chronic lower back pain: a multicenter, randomized, double-blind, placebo-controlled outpatient study. 2003;25(4):1123-1141.
46. Uberall MA, Mueller-Schwefe GH, Terhaag B. Efficacy and safety of flupirtine modified release for the management of moderate to severe chronic low back pain: results of SUPREME, a prospective randomized, double-blind, placebo- and active-controlled parallel-group phase IV study. 2012;28(10):1617-1634.

#### **Oral NSAIDs**

47. Coats TL, Borenstein DG, Nangia NK, Brown MT. Effects of valdecoxib in the treatment of chronic low back pain: results of a randomized, placebo-controlled trial. 2004;26(8):1249-1260.
48. Katz N, Borenstein DG, Birbara C, et al. Efficacy and safety of tanezumab in the treatment of chronic low back pain. 2011;152(10):2248-2258.
49. Katz N, Ju WD, Krupa DA, et al. Efficacy and safety of rofecoxib in patients with chronic low back pain: Results from two 4-week, randomized, placebo-controlled, parallel-group, double-blind trials. *Spine*. 2003;28(9):851-858.
50. Katz N, Rodgers DB, Krupa D, Reicin A. Onset of pain relief with rofecoxib in chronic low back pain: results of two four-week, randomized, placebo-controlled trials. 2004;20(5):651-658.
51. Kivitz AJ, Gimbel JS, Bramson C, et al. Efficacy and safety of tanezumab versus naproxen in the treatment of chronic low back pain. 2013;154(7):1009-1021.

#### **Rubefacients**

52. Chrubasik S, Weiser T, Beime B. Effectiveness and safety of topical capsaicin cream in the treatment of chronic soft tissue pain. 2010;24(12):1877-1885.
53. Frerick H, Keitel W, Kuhn U, Schmidt S, Bredehorst A, Kuhlmann M. Topical treatment of chronic low back pain with a capsicum plaster. 2003;106(1-2):59-64.
54. Keitel W, Frerick H, Kuhn U, Schmidt U, Kuhlmann M, Bredehorst A. Capsicum pain plaster in chronic non-specific low back pain. 2001;51(11):896-903.

#### **SNRI (duloxetine)**

55. Konno S, Oda N, Ochiai T, Alev L. Randomized, Double-blind, Placebo-controlled Phase III Trial of Duloxetine Monotherapy in Japanese Patients With Chronic Low Back Pain. 2016;41(22):1709-1717.
56. Skljarevski V, Desai D, Liu-Seifert H, et al. Efficacy and safety of duloxetine in patients with chronic low back pain. 2010;35(13):E578-585.
57. Skljarevski V, Ossanna M, Liu-Seifert H, et al. A double-blind, randomized trial of duloxetine versus placebo in the management of chronic low back pain. 2009;16(9):1041-1048.

58. Skljarevski V, Zhang S, Desai D, et al. Duloxetine versus placebo in patients with chronic low back pain: a 12-week, fixed-dose, randomized, double-blind trial. 2010;11(12):1282-1290.

### **Spinal Manipulation**

59. Bialosky JE, George SZ, Horn ME, Price DD, Staud R, Robinson ME. Spinal manipulative therapy-specific changes in pain sensitivity in individuals with low back pain (NCT01168999). 2014;15(2):136-148.
60. Bond BM, Kinslow CD, Yoder AW, Liu W. Effect of spinal manipulative therapy on mechanical pain sensitivity in patients with chronic nonspecific low back pain: a pilot randomized, controlled trial. *The Journal of manual & manipulative therapy*. 2020;28(1):15-27.
61. Ford JJ, Slater SL, Richards MC, et al. Individualised manual therapy plus guideline-based advice vs advice alone for people with clinical features of lumbar zygapophyseal joint pain: a randomised controlled trial. 2019;105(1):53-64.
62. Goertz CM, Salsbury SA, Long CR, et al. Patient-centered professional practice models for managing low back pain in older adults: a pilot randomized controlled trial. 2017;17(1):235.
63. Licciardone JC, Aryal S. Clinical response and relapse in patients with chronic low back pain following osteopathic manual treatment: results from the OSTEOPATHIC Trial. 2014;19(6):541-548.
64. Licciardone JC, Gatchel RJ, Aryal S. Recovery From Chronic Low Back Pain After Osteopathic Manipulative Treatment: a Randomized Controlled Trial. 2016;116(3):144-155.
65. Licciardone JC, Gatchel RJ, Aryal S. Targeting Patient Subgroups With Chronic Low Back Pain for Osteopathic Manipulative Treatment: responder Analyses From a Randomized Controlled Trial. 2016;116(3):156-168.
66. Licciardone JC, Kearns CM, Minotti DE. Outcomes of osteopathic manual treatment for chronic low back pain according to baseline pain severity: results from the OSTEOPATHIC Trial. 2013;18(6):533-540.
67. Licciardone JC, Minotti DE, Gatchel RJ, Kearns CM, Singh KP. Osteopathic manual treatment and ultrasound therapy for chronic low back pain: a randomized controlled trial. 2013;11(2):122-129.

### **Topical NSAIDs**

68. Nct. Flurbiprofen Tape for Treatment of Chronic Low Back Pain. 2008.
